# Supplementary material
Source: publisher figshare collection journal article supplement (https://rs.figshare.com/ndownloader/files/17763665)
Supplement: Supplementary file 1 [file 17763665]

## Sheet: ESM1_SurveyData
no	theme	question	deep-time support	near-time support	participant	experience	gender	background	used.palaeo.conseration	questionnaire.type
1	Ecosystem Function and Services	Do critical thresholds exist at which the loss of species diversity, or the loss of particular species, disrupts ecosystem functions and services, and how can these thresholds be predicted?	yes	yes	1	experienced	Male	conservation	Yes	mass.mail
2	Ecosystem Function and Services	What is the effectiveness of different methods for the assessment of ecosystem services?	no	no	1	experienced	Male	conservation	Yes	mass.mail
3	Ecosystem Function and Services	How can biodiversity considerations be integrated into economic policies to reflect the monetary and nonmonetary value of biodiversity, ecosystem processes, goods, and services?	no	no	1	experienced	Male	conservation	Yes	mass.mail
4	Ecosystem Function and Services	How can ecosystems be managed to increase protection of humans and biodiversity from extreme events?	no	yes	1	experienced	Male	conservation	Yes	mass.mail
5	Ecosystem Function and Services	How, where, and when has biodiversity loss affected human welfare?	no	yes	1	experienced	Male	conservation	Yes	mass.mail
6	Ecosystem Function and Services	What strategies for distributing the material benefits derived from biodiversity most effectively foster environmental stewardship and biodiversity conservation?	no	no	1	experienced	Male	conservation	Yes	mass.mail
7	Ecosystem Function and Services	How can protected area networks be designed to increase carbon storage benefits and mitigate climate impacts, with these benefits as incentives to support conservation actions?	no	no	1	experienced	Male	conservation	Yes	mass.mail
8	Ecosystem Function and Services	How does soil biodiversity contribute to the extent and persistence of ecosystem services, including agricultural productivity?	no	no	1	experienced	Male	conservation	Yes	mass.mail
9	Climate Change	9. What impact will the melting of polar ice and a reduction in permafrost have on the human use of high-latitude ecosystems, and how will these changes in human use affect biodiversity?	no	no	1	experienced	Male	conservation	Yes	mass.mail
10	Climate Change	10. Which elements of biodiversity in which locations are most vulnerable to climate change, including extreme events?	yes	yes	1	experienced	Male	conservation	Yes	mass.mail
11	Climate Change	11. How is the resilience of ecosystems to climate change affected by human activities and interventions?	no	yes	1	experienced	Male	conservation	Yes	mass.mail
12	Climate Change	12. What factors determine the rates at which coastal ecosystems can respond to sea-level rise, and which of these are amenable to management?	no	yes	1	experienced	Male	conservation	Yes	mass.mail
13	Climate Change	13. How will climate change, together with other environmental stressors, alter the distribution and prevalence of diseases of wild species?	no	no	1	experienced	Male	conservation	Yes	mass.mail
14	Climate Change	14. How will human responses to climate change (e.g., changes in agriculture, resource conflicts, and migration) affect biodiversity?	no	yes	1	experienced	Male	conservation	Yes	mass.mail
15	Climate Change	15. How might biodiversity policies and management practices be modified and implemented to accommodate climate change?	yes	yes	1	experienced	Male	conservation	Yes	mass.mail
16	Climate Change	16. How might emerging carbon markets affect biodiversity through their impacts on the protection, management, and creation of habitats?	no	no	1	experienced	Male	conservation	Yes	mass.mail
17	Climate Change	17. What are the potential effects of feedbacks between climate change and ecosystem dynamics (e.g., drought, forest dieback, and coral bleaching) on the effectiveness of policy measures to sequester carbon and protect biodiversity?	no	yes	1	experienced	Male	conservation	Yes	mass.mail
18	Climate Change	18. How much carbon is sequestered by different ecosystems, including their soils, and how can these ecosystems be managed to contribute most effectively to the mitigation of climate change?	no	yes	1	experienced	Male	conservation	Yes	mass.mail
19	Climate Change	19. How, where, and to what extent can natural and seminatural ecosystems contribute to climate change adaptation and mitigation?	no	yes	1	experienced	Male	conservation	Yes	mass.mail
20	Climate Change	20. How will climate change affect the distribution and impacts of climate-dependent disturbance regimes, such as fire?	yes	yes	1	experienced	Male	conservation	Yes	mass.mail
21	Climate Change	21. How will climate change affect global food production, and what are the resulting consequences for ecosystems and agrobiodiversity?	no	no	1	experienced	Male	conservation	Yes	mass.mail
22	Climate Change	22. How does biodiversity shape social resilience to the effects of climate change?	no	yes	1	experienced	Male	conservation	Yes	mass.mail
23	Technological Change	23. How might nanotechnology have positive or negative impacts on biodiversity conservation?	no	no	1	experienced	Male	conservation	Yes	mass.mail
24	Technological Change	24. How do the type, location, and associated mitigation measures of renewable energy technologies affect biodiversity?	no	no	1	experienced	Male	conservation	Yes	mass.mail
25	Technological Change	25. What are the direct and indirect impacts of genetically modified organisms on biodiversity?	no	no	1	experienced	Male	conservation	Yes	mass.mail
26	Technological Change	26. What are the implications for land use and biodiversity of the new and emerging “bioeconomy” markets (crops for pharmaceuticals, plastics, adhesives, etc.)?	no	no	1	experienced	Male	conservation	Yes	mass.mail
27	Protected Areas	27. How effective are different types of protected areas (e.g., strict nature reserves, hunting reserves, and national parks) at conserving biodiversity and providing ecosystem services?	no	yes	1	experienced	Male	conservation	Yes	mass.mail
28	Protected Areas	28. What is the management cost per hectare required to manage protected areas effectively, and how does this vary with management category, geography, and threat?	no	no	1	experienced	Male	conservation	Yes	mass.mail
29	Protected Areas	29. What are the human well-being costs and benefits of protected areas, how are these distributed, and how do they vary with governance, resource tenure arrangements, and site characteristics?	no	no	1	experienced	Male	conservation	Yes	mass.mail
30	Protected Areas	30. How does the management of protected areas affect conservation beyond the boundaries of the protected area, such as through the displacement of human populations, hunting, or fishing?	no	no	1	experienced	Male	conservation	Yes	mass.mail
31	Ecosystem Management and Restoration	31. What is the trade-off for biodiversity between balancing production of natural resources from intensive management systems, such as plantation forestry and aquaculture, versus harvesting those resources from more natural ecosystems?	no	no	1	experienced	Male	conservation	Yes	mass.mail
32	Ecosystem Management and Restoration	32. What was the condition of ecosystems before significant human disruption, and how can this knowledge be used to improve current and future management?	yes	yes	1	experienced	Male	conservation	Yes	mass.mail
33	Ecosystem Management and Restoration	33. What, and where, are the significant opportunities for large-scale ecosystem restoration that benefits biodiversity and human well-being?	yes	yes	1	experienced	Male	conservation	Yes	mass.mail
34	Ecosystem Management and Restoration	34. How can ecosystem management systems be designed to better emulate natural processes, notably natural disturbance regimes, and to what extent does this improve conservation effectiveness?	no	yes	1	experienced	Male	conservation	Yes	mass.mail
35	Ecosystem Management and Restoration	35. To what extent, and under what conditions, does the integration of marine, terrestrial, and freshwater ecosystems within conservation plans yield better outcomes than plans based on single realms?	no	no	1	experienced	Male	conservation	Yes	mass.mail
36	Ecosystem Management and Restoration	36. What spatial pattern of human settlement (e.g., clustered vs. dispersed) has the least impact on biodiversity?	no	no	1	experienced	Male	conservation	Yes	mass.mail
37	Ecosystem Management and Restoration	37. What is the contribution of areas that are intensively managed for production of commodities (such as food, timber, or biofuels) to conservation of biodiversity at the landscape scale?	no	no	1	experienced	Male	conservation	Yes	mass.mail
38	Ecosystem Management and Restoration	38. How can an understanding of factors affecting household decisions to invest in different naturalresource- based productive activities (e.g., agriculture, fishing, or hunting) be used to predict the biodiversity impacts of household responses to environmental change?	no	no	1	experienced	Male	conservation	Yes	mass.mail
39	Terrestrial Ecosystems	39. What are the impacts on biodiversity and ecosystem services of biofuel production and how will these vary by feedstock type, location, objective, and technology applied?	no	no	1	experienced	Male	conservation	Yes	mass.mail
40	Terrestrial Ecosystems	40. Under what conditions can agricultural intensification contribute to conserving overall biodiversity by reducing pressure to convert natural ecosystems?	no	no	1	experienced	Male	conservation	Yes	mass.mail
41	Terrestrial Ecosystems	41. What are the impacts (on and off site) on agricultural returns and biodiversity of “biodiversity-friendly” agricultural practices, such as organic, minimum tillage, and agroenvironment schemes?	no	no	1	experienced	Male	conservation	Yes	mass.mail
42	Terrestrial Ecosystems	42. Under what circumstances can afforestation, reforestation, and reduced emissions from deforestation and degradation (REDD) benefit biodiversity conservation, reduce emissions, and provide sustainable livelihoods?	no	no	1	experienced	Male	conservation	Yes	mass.mail
43	Terrestrial Ecosystems	43. How do different forms of forest governance influence biodiversity conservation outcomes and the implementation of REDD?	no	no	1	experienced	Male	conservation	Yes	mass.mail
44	Terrestrial Ecosystems	44. How are arid and semiarid ecosystems affected by the interaction of multiple stressors such as grazing by domestic livestock, soil erosion, and drought?	no	yes	1	experienced	Male	conservation	Yes	mass.mail
45	Terrestrial Ecosystems	45. What are the contributions of urban nature reserves and other green amenity spaces, such as golf courses, to biodiversity conservation, and how can these be enhanced?	no	no	1	experienced	Male	conservation	Yes	mass.mail
46	Marine Ecosystems	46. How will ocean acidification affect marine biodiversity and ecosystem function, and what measures could mitigate these effects?	yes	yes	1	experienced	Male	conservation	Yes	mass.mail
47	Marine Ecosystems	47. What are the ecological, social, and economic impacts resulting from the expansion of freshwater and marine aquaculture?	no	no	1	experienced	Male	conservation	Yes	mass.mail
48	Marine Ecosystems	48. Which management actions are most effective for ensuring the long-term survival of coral reefs in response to the combined impacts of climate change and other existing stressors?	yes	yes	1	experienced	Male	conservation	Yes	mass.mail
49	Marine Ecosystems	49. Which management approaches to fisheries are most effective at mitigating the impacts of fish extraction and fishing gear on nontarget species and their habitats?	no	no	1	experienced	Male	conservation	Yes	mass.mail
50	Marine Ecosystems	50. How does the effectiveness of marine protected areas vary with biological, physical, and social factors and with connectivity to other protected areas?	no	no	1	experienced	Male	conservation	Yes	mass.mail
51	Marine Ecosystems	51. What will be the impacts of climate change on phytoplankton and oceanic productivity, and what will be the feedbacks of these impacts on the climate?	yes	yes	1	experienced	Male	conservation	Yes	mass.mail
52	Marine Ecosystems	52. How will multiple stressors, especially fishing, pollution, sea temperature fluctuations, acidification, and diseases, interact to affect marine ecosystems?	yes	yes	1	experienced	Male	conservation	Yes	mass.mail
53	Marine Ecosystems	53. Which mechanisms are most effective at conserving biodiversity in ocean areas occurring outside the legal jurisdiction of any single country?	no	no	1	experienced	Male	conservation	Yes	mass.mail
54	Freshwater Ecosystems	54. How can freshwater biodiversity and ecosystem service values best be incorporated in the design of water-provisioning schemes for direct human use and food production?	no	no	1	experienced	Male	conservation	Yes	mass.mail
55	Freshwater Ecosystems	55. Which aquatic species and communities are most vulnerable to human impacts, and how would their degradation affect the provision of ecosystem services?	no	yes	1	experienced	Male	conservation	Yes	mass.mail
56	Freshwater Ecosystems	56. Where will the impacts of global climate change on hydrology be most extreme, and how might they affect freshwater species and the ability of wetlands and inland waters to deliver ecosystem services?	no	yes	1	experienced	Male	conservation	Yes	mass.mail
57	Freshwater Ecosystems	57. Which multinational governance, cross-sector cooperation arrangements, and finance mechanisms will make freshwater ecosystem management more effective and reduce international conflicts over water?	no	no	1	experienced	Male	conservation	Yes	mass.mail
58	Freshwater Ecosystems	58. How does investment in restoration of wetlands and riparian areas compare with construction of dams and flood defenses in providing cost-effective improvements in flood management and the storage and retention of water for domestic, industrial, and agricultural use?	no	no	1	experienced	Male	conservation	Yes	mass.mail
59	Species Management	59. Under what conditions is trade in captive or wildharvested species beneficial for wild populations of the traded species?	no	no	1	experienced	Male	conservation	Yes	mass.mail
60	Species Management	60. What information is required to enable responsible authorities to decide when and how to manage nonnative species?	no	no	1	experienced	Male	conservation	Yes	mass.mail
61	Species Management	61. What is the relative effectiveness of different methods for facilitating movement of a species among disjunct patches of its habitat?	no	no	1	experienced	Male	conservation	Yes	mass.mail
62	Species Management	62. What is the cost-effectiveness of different contributions to species conservation programs such as education, captive breeding, and habitat management?	no	no	1	experienced	Male	conservation	Yes	mass.mail
63	Species Management	63. What are the ecosystem impacts of efforts to conserve charismatic, flagship, or umbrella species?	no	no	1	experienced	Male	conservation	Yes	mass.mail
64	Species Management	64. What are the likely risks, costs, and benefits of reintroducing and translocating species as a response to climate change?	no	yes	1	experienced	Male	conservation	Yes	mass.mail
65	Species Management	65. What are the most effective approaches for reversing range and population collapse in top predators, large herbivores, and other species that exert disproportionate effects on ecosystem structure and function?	no	no	1	experienced	Male	conservation	Yes	mass.mail
66	Species Management	66. How can we best manage diseases that have the potential to move among wild species, domestic species, and people?	no	no	1	experienced	Male	conservation	Yes	mass.mail
67	Organizational Systems and Processes	67. How do the characteristics of the organizations (e.g., government vs. nongovernment) and their funding (e.g., amount and duration of funds) shape the effectiveness of conservation interventions?	no	no	1	experienced	Male	conservation	Yes	mass.mail
68	Organizational Systems and Processes	68. What factors affect the extent to which practitioners integrate consideration of human needs and preferences into policy and practice?	no	no	1	experienced	Male	conservation	Yes	mass.mail
69	Organizational Systems and Processes	69. What is the cost-effectiveness of different approaches for rapidly expanding professional conservation capacity, and how does this vary with circumstances and among countries?	no	no	1	experienced	Male	conservation	Yes	mass.mail
70	Organizational Systems and Processes	70. What is the effectiveness of the different mechanisms used to foster the evaluation and dissemination of conservation interventions?	no	no	1	experienced	Male	conservation	Yes	mass.mail
71	Organizational Systems and Processes	71. How effective are the different strategies devised to integrate scientific knowledge into conservation policy and practice?	no	no	1	experienced	Male	conservation	Yes	mass.mail
72	Organizational Systems and Processes	72. How effective are the different mechanisms used to promote data sharing and collaboration among individuals, conservationists, and conservation organizations?	no	no	1	experienced	Male	conservation	Yes	mass.mail
73	Societal Context and Change	73. What are the impacts on biodiversity of shifting patterns and trends in human demography, economic activity, consumption, and technology?	no	no	1	experienced	Male	conservation	Yes	mass.mail
74	Societal Context and Change	74. How does the relationship between economic growth and biodiversity vary across scales, among different types of ecosystems, and with the type of economic activity?	no	no	1	experienced	Male	conservation	Yes	mass.mail
75	Societal Context and Change	75. What are the direct and indirect impacts of armed conflict on biodiversity?	no	no	1	experienced	Male	conservation	Yes	mass.mail
76	Societal Context and Change	76. What are the biodiversity impacts of changes in energy prices?	no	no	1	experienced	Male	conservation	Yes	mass.mail
77	Societal Context and Change	77. How do resource tenure systems shape conservation outcomes in different social and ecological contexts?	no	no	1	experienced	Male	conservation	Yes	mass.mail
78	Societal Context and Change	78. What are the impacts of international trade agreements and related policy instruments on biodiversity?	no	no	1	experienced	Male	conservation	Yes	mass.mail
79	Societal Context and Change	79. How do economic subsidies affect biodiversity within the recipient country and elsewhere?	no	no	1	experienced	Male	conservation	Yes	mass.mail
80	Societal Context and Change	80. How does corruption influence the effectiveness of conservation, and what are the most effective ways of preventing negative consequences?	no	no	1	experienced	Male	conservation	Yes	mass.mail
81	Societal Context and Change	81. What are the conservation impacts of improved access to education, employment, and reproductive choice?	no	no	1	experienced	Male	conservation	Yes	mass.mail
82	Societal Context and Change	82. What is the relationship between individuals learning about environmental problems and their conservation attitudes, knowledge, beliefs, and behaviors?	no	no	1	experienced	Male	conservation	Yes	mass.mail
83	Societal Context and Change	83. What are the impacts of increasing human dissociation from nature on the conservation of biodiversity?	no	no	1	experienced	Male	conservation	Yes	mass.mail
84	Societal Context and Change	84. What are the effects of changes in human patterns of food consumption on biodiversity (e.g., shift from bushmeat to domestic meat and from fish to plantbased protein), and how are such human patterns of food consumption shaped by education programs, financial incentives, and other policy instruments?	no	no	1	experienced	Male	conservation	Yes	mass.mail
85	Societal Context and Change	85. What factors shape human (in)tolerance of the presence and activities ofwild animals, especially where those animals induce human–wildlife conflict?	no	no	1	experienced	Male	conservation	Yes	mass.mail
86	Impacts of Conservation Interventions	86. What have been the impacts on biodiversity of the Convention on Biological Diversity 2010 targets, and what objectives, mechanism, time frame, and means of measurement would be most effective for future targets?	no	no	1	experienced	Male	conservation	Yes	mass.mail
87	Impacts of Conservation Interventions	87. How do different values (e.g., use vs. preservation) and the framing of these values (e.g., ecosystem services vs. species) motivate policy makers to assign public resources to conservation programs and policies?	no	no	1	experienced	Male	conservation	Yes	mass.mail
88	Impacts of Conservation Interventions	88. What factors shape individual and state compliance with local, national, and international conservation regimes?	no	no	1	experienced	Male	conservation	Yes	mass.mail
89	Impacts of Conservation Interventions	89. What are the consequences of investment in improving knowledge (e.g., status, nature of threat, and effectiveness of interventions) versus expenditure on conservation action, and how does this differ among conservation issues?	no	no	1	experienced	Male	conservation	Yes	mass.mail
90	Impacts of Conservation Interventions	90. What are the impacts on biodiversity and human well-being of differing approaches to devolving the responsibility for natural resource management?	no	no	1	experienced	Male	conservation	Yes	mass.mail
91	Impacts of Conservation Interventions	91. What are the impacts of different conservation incentive programs on biodiversity and human wellbeing?	no	no	1	experienced	Male	conservation	Yes	mass.mail
92	Impacts of Conservation Interventions	92. How does public involvement, especially of marginalized groups, in conservation decision making shape the effectiveness of conservation interventions?	no	no	1	experienced	Male	conservation	Yes	mass.mail
93	Impacts of Conservation Interventions	93. What are the impacts of free, prior, and informed consent policies on the emergence, evolution, and performance of conservation interventions?	no	no	1	experienced	Male	conservation	Yes	mass.mail
94	Impacts of Conservation Interventions	94. How does providing information to resource users affect individual behavior and support for collective restrictions, and how does the effect vary with different means of providing the information?	no	no	1	experienced	Male	conservation	Yes	mass.mail
95	Impacts of Conservation Interventions	95. What are the conservation impacts of corporate social responsibility regimes that are biodiversityoriented?	no	no	1	experienced	Male	conservation	Yes	mass.mail
96	Impacts of Conservation Interventions	96. What are the social impacts of conservation interventions, and how and why do these impacts vary among social groups (e.g., elites, poor, women, and indigenous)?	no	no	1	experienced	Male	conservation	Yes	mass.mail
97	Impacts of Conservation Interventions	97. What factors shape the likelihood and extent of formal recognition of customary rights and traditional institutions as the basis for conservation policy and practices, and what are the impacts of this formal recognition on conservation outcomes?	no	yes	1	experienced	Male	conservation	Yes	mass.mail
98	Impacts of Conservation Interventions	98. What are the most cost-effectivemeans of encouraging broad, long-lasting, and active societal support and action for conservation in different contexts and among different actors?	no	no	1	experienced	Male	conservation	Yes	mass.mail
99	Impacts of Conservation Interventions	99. What has been the effect of environmental impact assessments on biodiversity conservation?	no	no	1	experienced	Male	conservation	Yes	mass.mail
100	Impacts of Conservation Interventions	100. What mechanisms best promote the use of local ideas and knowledge in conservation programs in ways that enhance biodiversity outcomes?	no	no	1	experienced	Male	conservation	Yes	mass.mail
1	Ecosystem Function and Services	Do critical thresholds exist at which the loss of species diversity, or the loss of particular species, disrupts ecosystem functions and services, and how can these thresholds be predicted?	yes	yes	2	experienced	Male	palaeo	Yes	mass.mail
2	Ecosystem Function and Services	What is the effectiveness of different methods for the assessment of ecosystem services?	yes	yes	2	experienced	Male	palaeo	Yes	mass.mail
3	Ecosystem Function and Services	How can biodiversity considerations be integrated into economic policies to reflect the monetary and nonmonetary value of biodiversity, ecosystem processes, goods, and services?	no	no	2	experienced	Male	palaeo	Yes	mass.mail
4	Ecosystem Function and Services	How can ecosystems be managed to increase protection of humans and biodiversity from extreme events?	no	no	2	experienced	Male	palaeo	Yes	mass.mail
5	Ecosystem Function and Services	How, where, and when has biodiversity loss affected human welfare?	no	yes	2	experienced	Male	palaeo	Yes	mass.mail
6	Ecosystem Function and Services	What strategies for distributing the material benefits derived from biodiversity most effectively foster environmental stewardship and biodiversity conservation?	no	no	2	experienced	Male	palaeo	Yes	mass.mail
7	Ecosystem Function and Services	How can protected area networks be designed to increase carbon storage benefits and mitigate climate impacts, with these benefits as incentives to support conservation actions?	no	no	2	experienced	Male	palaeo	Yes	mass.mail
8	Ecosystem Function and Services	How does soil biodiversity contribute to the extent and persistence of ecosystem services, including agricultural productivity?	no	no	2	experienced	Male	palaeo	Yes	mass.mail
9	Climate Change	9. What impact will the melting of polar ice and a reduction in permafrost have on the human use of high-latitude ecosystems, and how will these changes in human use affect biodiversity?	no	no	2	experienced	Male	palaeo	Yes	mass.mail
10	Climate Change	10. Which elements of biodiversity in which locations are most vulnerable to climate change, including extreme events?	yes	yes	2	experienced	Male	palaeo	Yes	mass.mail
11	Climate Change	11. How is the resilience of ecosystems to climate change affected by human activities and interventions?	no	yes	2	experienced	Male	palaeo	Yes	mass.mail
12	Climate Change	12. What factors determine the rates at which coastal ecosystems can respond to sea-level rise, and which of these are amenable to management?	yes	yes	2	experienced	Male	palaeo	Yes	mass.mail
13	Climate Change	13. How will climate change, together with other environmental stressors, alter the distribution and prevalence of diseases of wild species?	no	no	2	experienced	Male	palaeo	Yes	mass.mail
14	Climate Change	14. How will human responses to climate change (e.g., changes in agriculture, resource conflicts, and migration) affect biodiversity?	no	no	2	experienced	Male	palaeo	Yes	mass.mail
15	Climate Change	15. How might biodiversity policies and management practices be modified and implemented to accommodate climate change?	no	no	2	experienced	Male	palaeo	Yes	mass.mail
16	Climate Change	16. How might emerging carbon markets affect biodiversity through their impacts on the protection, management, and creation of habitats?	no	no	2	experienced	Male	palaeo	Yes	mass.mail
17	Climate Change	17. What are the potential effects of feedbacks between climate change and ecosystem dynamics (e.g., drought, forest dieback, and coral bleaching) on the effectiveness of policy measures to sequester carbon and protect biodiversity?	no	no	2	experienced	Male	palaeo	Yes	mass.mail
18	Climate Change	18. How much carbon is sequestered by different ecosystems, including their soils, and how can these ecosystems be managed to contribute most effectively to the mitigation of climate change?	yes	yes	2	experienced	Male	palaeo	Yes	mass.mail
19	Climate Change	19. How, where, and to what extent can natural and seminatural ecosystems contribute to climate change adaptation and mitigation?	yes	yes	2	experienced	Male	palaeo	Yes	mass.mail
20	Climate Change	20. How will climate change affect the distribution and impacts of climate-dependent disturbance regimes, such as fire?	yes	yes	2	experienced	Male	palaeo	Yes	mass.mail
21	Climate Change	21. How will climate change affect global food production, and what are the resulting consequences for ecosystems and agrobiodiversity?	no	no	2	experienced	Male	palaeo	Yes	mass.mail
22	Climate Change	22. How does biodiversity shape social resilience to the effects of climate change?	no	no	2	experienced	Male	palaeo	Yes	mass.mail
23	Technological Change	23. How might nanotechnology have positive or negative impacts on biodiversity conservation?	no	no	2	experienced	Male	palaeo	Yes	mass.mail
24	Technological Change	24. How do the type, location, and associated mitigation measures of renewable energy technologies affect biodiversity?	no	no	2	experienced	Male	palaeo	Yes	mass.mail
25	Technological Change	25. What are the direct and indirect impacts of genetically modified organisms on biodiversity?	no	no	2	experienced	Male	palaeo	Yes	mass.mail
26	Technological Change	26. What are the implications for land use and biodiversity of the new and emerging “bioeconomy” markets (crops for pharmaceuticals, plastics, adhesives, etc.)?	no	no	2	experienced	Male	palaeo	Yes	mass.mail
27	Protected Areas	27. How effective are different types of protected areas (e.g., strict nature reserves, hunting reserves, and national parks) at conserving biodiversity and providing ecosystem services?	no	yes	2	experienced	Male	palaeo	Yes	mass.mail
28	Protected Areas	28. What is the management cost per hectare required to manage protected areas effectively, and how does this vary with management category, geography, and threat?	no	no	2	experienced	Male	palaeo	Yes	mass.mail
29	Protected Areas	29. What are the human well-being costs and benefits of protected areas, how are these distributed, and how do they vary with governance, resource tenure arrangements, and site characteristics?	no	no	2	experienced	Male	palaeo	Yes	mass.mail
30	Protected Areas	30. How does the management of protected areas affect conservation beyond the boundaries of the protected area, such as through the displacement of human populations, hunting, or fishing?	no	yes	2	experienced	Male	palaeo	Yes	mass.mail
31	Ecosystem Management and Restoration	31. What is the trade-off for biodiversity between balancing production of natural resources from intensive management systems, such as plantation forestry and aquaculture, versus harvesting those resources from more natural ecosystems?	no	no	2	experienced	Male	palaeo	Yes	mass.mail
32	Ecosystem Management and Restoration	32. What was the condition of ecosystems before significant human disruption, and how can this knowledge be used to improve current and future management?	no	yes	2	experienced	Male	palaeo	Yes	mass.mail
33	Ecosystem Management and Restoration	33. What, and where, are the significant opportunities for large-scale ecosystem restoration that benefits biodiversity and human well-being?	no	yes	2	experienced	Male	palaeo	Yes	mass.mail
34	Ecosystem Management and Restoration	34. How can ecosystem management systems be designed to better emulate natural processes, notably natural disturbance regimes, and to what extent does this improve conservation effectiveness?	no	yes	2	experienced	Male	palaeo	Yes	mass.mail
35	Ecosystem Management and Restoration	35. To what extent, and under what conditions, does the integration of marine, terrestrial, and freshwater ecosystems within conservation plans yield better outcomes than plans based on single realms?	no	no	2	experienced	Male	palaeo	Yes	mass.mail
36	Ecosystem Management and Restoration	36. What spatial pattern of human settlement (e.g., clustered vs. dispersed) has the least impact on biodiversity?	no	no	2	experienced	Male	palaeo	Yes	mass.mail
37	Ecosystem Management and Restoration	37. What is the contribution of areas that are intensively managed for production of commodities (such as food, timber, or biofuels) to conservation of biodiversity at the landscape scale?	no	no	2	experienced	Male	palaeo	Yes	mass.mail
38	Ecosystem Management and Restoration	38. How can an understanding of factors affecting household decisions to invest in different naturalresource- based productive activities (e.g., agriculture, fishing, or hunting) be used to predict the biodiversity impacts of household responses to environmental change?	no	no	2	experienced	Male	palaeo	Yes	mass.mail
39	Terrestrial Ecosystems	39. What are the impacts on biodiversity and ecosystem services of biofuel production and how will these vary by feedstock type, location, objective, and technology applied?	no	no	2	experienced	Male	palaeo	Yes	mass.mail
40	Terrestrial Ecosystems	40. Under what conditions can agricultural intensification contribute to conserving overall biodiversity by reducing pressure to convert natural ecosystems?	no	no	2	experienced	Male	palaeo	Yes	mass.mail
41	Terrestrial Ecosystems	41. What are the impacts (on and off site) on agricultural returns and biodiversity of “biodiversity-friendly” agricultural practices, such as organic, minimum tillage, and agroenvironment schemes?	no	no	2	experienced	Male	palaeo	Yes	mass.mail
42	Terrestrial Ecosystems	42. Under what circumstances can afforestation, reforestation, and reduced emissions from deforestation and degradation (REDD) benefit biodiversity conservation, reduce emissions, and provide sustainable livelihoods?	no	no	2	experienced	Male	palaeo	Yes	mass.mail
43	Terrestrial Ecosystems	43. How do different forms of forest governance influence biodiversity conservation outcomes and the implementation of REDD?	no	no	2	experienced	Male	palaeo	Yes	mass.mail
44	Terrestrial Ecosystems	44. How are arid and semiarid ecosystems affected by the interaction of multiple stressors such as grazing by domestic livestock, soil erosion, and drought?	no	no	2	experienced	Male	palaeo	Yes	mass.mail
45	Terrestrial Ecosystems	45. What are the contributions of urban nature reserves and other green amenity spaces, such as golf courses, to biodiversity conservation, and how can these be enhanced?	no	no	2	experienced	Male	palaeo	Yes	mass.mail
46	Marine Ecosystems	46. How will ocean acidification affect marine biodiversity and ecosystem function, and what measures could mitigate these effects?	yes	yes	2	experienced	Male	palaeo	Yes	mass.mail
47	Marine Ecosystems	47. What are the ecological, social, and economic impacts resulting from the expansion of freshwater and marine aquaculture?	no	yes	2	experienced	Male	palaeo	Yes	mass.mail
48	Marine Ecosystems	48. Which management actions are most effective for ensuring the long-term survival of coral reefs in response to the combined impacts of climate change and other existing stressors?	yes	yes	2	experienced	Male	palaeo	Yes	mass.mail
49	Marine Ecosystems	49. Which management approaches to fisheries are most effective at mitigating the impacts of fish extraction and fishing gear on nontarget species and their habitats?	no	no	2	experienced	Male	palaeo	Yes	mass.mail
50	Marine Ecosystems	50. How does the effectiveness of marine protected areas vary with biological, physical, and social factors and with connectivity to other protected areas?	no	yes	2	experienced	Male	palaeo	Yes	mass.mail
51	Marine Ecosystems	51. What will be the impacts of climate change on phytoplankton and oceanic productivity, and what will be the feedbacks of these impacts on the climate?	yes	yes	2	experienced	Male	palaeo	Yes	mass.mail
52	Marine Ecosystems	52. How will multiple stressors, especially fishing, pollution, sea temperature fluctuations, acidification, and diseases, interact to affect marine ecosystems?	no	yes	2	experienced	Male	palaeo	Yes	mass.mail
53	Marine Ecosystems	53. Which mechanisms are most effective at conserving biodiversity in ocean areas occurring outside the legal jurisdiction of any single country?	no	no	2	experienced	Male	palaeo	Yes	mass.mail
54	Freshwater Ecosystems	54. How can freshwater biodiversity and ecosystem service values best be incorporated in the design of water-provisioning schemes for direct human use and food production?	no	no	2	experienced	Male	palaeo	Yes	mass.mail
55	Freshwater Ecosystems	55. Which aquatic species and communities are most vulnerable to human impacts, and how would their degradation affect the provision of ecosystem services?	no	yes	2	experienced	Male	palaeo	Yes	mass.mail
56	Freshwater Ecosystems	56. Where will the impacts of global climate change on hydrology be most extreme, and how might they affect freshwater species and the ability of wetlands and inland waters to deliver ecosystem services?	no	yes	2	experienced	Male	palaeo	Yes	mass.mail
57	Freshwater Ecosystems	57. Which multinational governance, cross-sector cooperation arrangements, and finance mechanisms will make freshwater ecosystem management more effective and reduce international conflicts over water?	no	no	2	experienced	Male	palaeo	Yes	mass.mail
58	Freshwater Ecosystems	58. How does investment in restoration of wetlands and riparian areas compare with construction of dams and flood defenses in providing cost-effective improvements in flood management and the storage and retention of water for domestic, industrial, and agricultural use?	no	no	2	experienced	Male	palaeo	Yes	mass.mail
59	Species Management	59. Under what conditions is trade in captive or wildharvested species beneficial for wild populations of the traded species?	no	no	2	experienced	Male	palaeo	Yes	mass.mail
60	Species Management	60. What information is required to enable responsible authorities to decide when and how to manage nonnative species?	no	no	2	experienced	Male	palaeo	Yes	mass.mail
61	Species Management	61. What is the relative effectiveness of different methods for facilitating movement of a species among disjunct patches of its habitat?	no	no	2	experienced	Male	palaeo	Yes	mass.mail
62	Species Management	62. What is the cost-effectiveness of different contributions to species conservation programs such as education, captive breeding, and habitat management?	no	no	2	experienced	Male	palaeo	Yes	mass.mail
63	Species Management	63. What are the ecosystem impacts of efforts to conserve charismatic, flagship, or umbrella species?	no	no	2	experienced	Male	palaeo	Yes	mass.mail
64	Species Management	64. What are the likely risks, costs, and benefits of reintroducing and translocating species as a response to climate change?	no	no	2	experienced	Male	palaeo	Yes	mass.mail
65	Species Management	65. What are the most effective approaches for reversing range and population collapse in top predators, large herbivores, and other species that exert disproportionate effects on ecosystem structure and function?	no	no	2	experienced	Male	palaeo	Yes	mass.mail
66	Species Management	66. How can we best manage diseases that have the potential to move among wild species, domestic species, and people?	no	no	2	experienced	Male	palaeo	Yes	mass.mail
67	Organizational Systems and Processes	67. How do the characteristics of the organizations (e.g., government vs. nongovernment) and their funding (e.g., amount and duration of funds) shape the effectiveness of conservation interventions?	no	no	2	experienced	Male	palaeo	Yes	mass.mail
68	Organizational Systems and Processes	68. What factors affect the extent to which practitioners integrate consideration of human needs and preferences into policy and practice?	no	no	2	experienced	Male	palaeo	Yes	mass.mail
69	Organizational Systems and Processes	69. What is the cost-effectiveness of different approaches for rapidly expanding professional conservation capacity, and how does this vary with circumstances and among countries?	no	no	2	experienced	Male	palaeo	Yes	mass.mail
70	Organizational Systems and Processes	70. What is the effectiveness of the different mechanisms used to foster the evaluation and dissemination of conservation interventions?	no	no	2	experienced	Male	palaeo	Yes	mass.mail
71	Organizational Systems and Processes	71. How effective are the different strategies devised to integrate scientific knowledge into conservation policy and practice?	no	no	2	experienced	Male	palaeo	Yes	mass.mail
72	Organizational Systems and Processes	72. How effective are the different mechanisms used to promote data sharing and collaboration among individuals, conservationists, and conservation organizations?	no	no	2	experienced	Male	palaeo	Yes	mass.mail
73	Societal Context and Change	73. What are the impacts on biodiversity of shifting patterns and trends in human demography, economic activity, consumption, and technology?	no	yes	2	experienced	Male	palaeo	Yes	mass.mail
74	Societal Context and Change	74. How does the relationship between economic growth and biodiversity vary across scales, among different types of ecosystems, and with the type of economic activity?	no	no	2	experienced	Male	palaeo	Yes	mass.mail
75	Societal Context and Change	75. What are the direct and indirect impacts of armed conflict on biodiversity?	no	no	2	experienced	Male	palaeo	Yes	mass.mail
76	Societal Context and Change	76. What are the biodiversity impacts of changes in energy prices?	no	no	2	experienced	Male	palaeo	Yes	mass.mail
77	Societal Context and Change	77. How do resource tenure systems shape conservation outcomes in different social and ecological contexts?	no	no	2	experienced	Male	palaeo	Yes	mass.mail
78	Societal Context and Change	78. What are the impacts of international trade agreements and related policy instruments on biodiversity?	no	no	2	experienced	Male	palaeo	Yes	mass.mail
79	Societal Context and Change	79. How do economic subsidies affect biodiversity within the recipient country and elsewhere?	no	no	2	experienced	Male	palaeo	Yes	mass.mail
80	Societal Context and Change	80. How does corruption influence the effectiveness of conservation, and what are the most effective ways of preventing negative consequences?	no	no	2	experienced	Male	palaeo	Yes	mass.mail
81	Societal Context and Change	81. What are the conservation impacts of improved access to education, employment, and reproductive choice?	no	no	2	experienced	Male	palaeo	Yes	mass.mail
82	Societal Context and Change	82. What is the relationship between individuals learning about environmental problems and their conservation attitudes, knowledge, beliefs, and behaviors?	no	no	2	experienced	Male	palaeo	Yes	mass.mail
83	Societal Context and Change	83. What are the impacts of increasing human dissociation from nature on the conservation of biodiversity?	no	no	2	experienced	Male	palaeo	Yes	mass.mail
84	Societal Context and Change	84. What are the effects of changes in human patterns of food consumption on biodiversity (e.g., shift from bushmeat to domestic meat and from fish to plantbased protein), and how are such human patterns of food consumption shaped by education programs, financial incentives, and other policy instruments?	no	no	2	experienced	Male	palaeo	Yes	mass.mail
85	Societal Context and Change	85. What factors shape human (in)tolerance of the presence and activities ofwild animals, especially where those animals induce human–wildlife conflict?	no	no	2	experienced	Male	palaeo	Yes	mass.mail
86	Impacts of Conservation Interventions	86. What have been the impacts on biodiversity of the Convention on Biological Diversity 2010 targets, and what objectives, mechanism, time frame, and means of measurement would be most effective for future targets?	no	no	2	experienced	Male	palaeo	Yes	mass.mail
87	Impacts of Conservation Interventions	87. How do different values (e.g., use vs. preservation) and the framing of these values (e.g., ecosystem services vs. species) motivate policy makers to assign public resources to conservation programs and policies?	no	no	2	experienced	Male	palaeo	Yes	mass.mail
88	Impacts of Conservation Interventions	88. What factors shape individual and state compliance with local, national, and international conservation regimes?	no	no	2	experienced	Male	palaeo	Yes	mass.mail
89	Impacts of Conservation Interventions	89. What are the consequences of investment in improving knowledge (e.g., status, nature of threat, and effectiveness of interventions) versus expenditure on conservation action, and how does this differ among conservation issues?	no	no	2	experienced	Male	palaeo	Yes	mass.mail
90	Impacts of Conservation Interventions	90. What are the impacts on biodiversity and human well-being of differing approaches to devolving the responsibility for natural resource management?	no	no	2	experienced	Male	palaeo	Yes	mass.mail
91	Impacts of Conservation Interventions	91. What are the impacts of different conservation incentive programs on biodiversity and human wellbeing?	no	no	2	experienced	Male	palaeo	Yes	mass.mail
92	Impacts of Conservation Interventions	92. How does public involvement, especially of marginalized groups, in conservation decision making shape the effectiveness of conservation interventions?	no	no	2	experienced	Male	palaeo	Yes	mass.mail
93	Impacts of Conservation Interventions	93. What are the impacts of free, prior, and informed consent policies on the emergence, evolution, and performance of conservation interventions?	no	no	2	experienced	Male	palaeo	Yes	mass.mail
94	Impacts of Conservation Interventions	94. How does providing information to resource users affect individual behavior and support for collective restrictions, and how does the effect vary with different means of providing the information?	no	no	2	experienced	Male	palaeo	Yes	mass.mail
95	Impacts of Conservation Interventions	95. What are the conservation impacts of corporate social responsibility regimes that are biodiversityoriented?	no	no	2	experienced	Male	palaeo	Yes	mass.mail
96	Impacts of Conservation Interventions	96. What are the social impacts of conservation interventions, and how and why do these impacts vary among social groups (e.g., elites, poor, women, and indigenous)?	no	no	2	experienced	Male	palaeo	Yes	mass.mail
97	Impacts of Conservation Interventions	97. What factors shape the likelihood and extent of formal recognition of customary rights and traditional institutions as the basis for conservation policy and practices, and what are the impacts of this formal recognition on conservation outcomes?	no	no	2	experienced	Male	palaeo	Yes	mass.mail
98	Impacts of Conservation Interventions	98. What are the most cost-effectivemeans of encouraging broad, long-lasting, and active societal support and action for conservation in different contexts and among different actors?	no	no	2	experienced	Male	palaeo	Yes	mass.mail
99	Impacts of Conservation Interventions	99. What has been the effect of environmental impact assessments on biodiversity conservation?	no	no	2	experienced	Male	palaeo	Yes	mass.mail
100	Impacts of Conservation Interventions	100. What mechanisms best promote the use of local ideas and knowledge in conservation programs in ways that enhance biodiversity outcomes?	no	no	2	experienced	Male	palaeo	Yes	mass.mail
1	Ecosystem Function and Services	Do critical thresholds exist at which the loss of species diversity, or the loss of particular species, disrupts ecosystem functions and services, and how can these thresholds be predicted?	yes	yes	3	experienced	Male	palaeo	Yes	mass.mail
2	Ecosystem Function and Services	What is the effectiveness of different methods for the assessment of ecosystem services?	yes	yes	3	experienced	Male	palaeo	Yes	mass.mail
3	Ecosystem Function and Services	How can biodiversity considerations be integrated into economic policies to reflect the monetary and nonmonetary value of biodiversity, ecosystem processes, goods, and services?	yes	yes	3	experienced	Male	palaeo	Yes	mass.mail
4	Ecosystem Function and Services	How can ecosystems be managed to increase protection of humans and biodiversity from extreme events?	no	yes	3	experienced	Male	palaeo	Yes	mass.mail
5	Ecosystem Function and Services	How, where, and when has biodiversity loss affected human welfare?	no	yes	3	experienced	Male	palaeo	Yes	mass.mail
6	Ecosystem Function and Services	What strategies for distributing the material benefits derived from biodiversity most effectively foster environmental stewardship and biodiversity conservation?	no	no	3	experienced	Male	palaeo	Yes	mass.mail
7	Ecosystem Function and Services	How can protected area networks be designed to increase carbon storage benefits and mitigate climate impacts, with these benefits as incentives to support conservation actions?	no	no	3	experienced	Male	palaeo	Yes	mass.mail
8	Ecosystem Function and Services	How does soil biodiversity contribute to the extent and persistence of ecosystem services, including agricultural productivity?	no	yes	3	experienced	Male	palaeo	Yes	mass.mail
9	Climate Change	9. What impact will the melting of polar ice and a reduction in permafrost have on the human use of high-latitude ecosystems, and how will these changes in human use affect biodiversity?	no	yes	3	experienced	Male	palaeo	Yes	mass.mail
10	Climate Change	10. Which elements of biodiversity in which locations are most vulnerable to climate change, including extreme events?	yes	yes	3	experienced	Male	palaeo	Yes	mass.mail
11	Climate Change	11. How is the resilience of ecosystems to climate change affected by human activities and interventions?	yes	no	3	experienced	Male	palaeo	Yes	mass.mail
12	Climate Change	12. What factors determine the rates at which coastal ecosystems can respond to sea-level rise, and which of these are amenable to management?	yes	yes	3	experienced	Male	palaeo	Yes	mass.mail
13	Climate Change	13. How will climate change, together with other environmental stressors, alter the distribution and prevalence of diseases of wild species?	no	yes	3	experienced	Male	palaeo	Yes	mass.mail
14	Climate Change	14. How will human responses to climate change (e.g., changes in agriculture, resource conflicts, and migration) affect biodiversity?	yes	yes	3	experienced	Male	palaeo	Yes	mass.mail
15	Climate Change	15. How might biodiversity policies and management practices be modified and implemented to accommodate climate change?	yes	yes	3	experienced	Male	palaeo	Yes	mass.mail
16	Climate Change	16. How might emerging carbon markets affect biodiversity through their impacts on the protection, management, and creation of habitats?	no	no	3	experienced	Male	palaeo	Yes	mass.mail
17	Climate Change	17. What are the potential effects of feedbacks between climate change and ecosystem dynamics (e.g., drought, forest dieback, and coral bleaching) on the effectiveness of policy measures to sequester carbon and protect biodiversity?	no	yes	3	experienced	Male	palaeo	Yes	mass.mail
18	Climate Change	18. How much carbon is sequestered by different ecosystems, including their soils, and how can these ecosystems be managed to contribute most effectively to the mitigation of climate change?	no	yes	3	experienced	Male	palaeo	Yes	mass.mail
19	Climate Change	19. How, where, and to what extent can natural and seminatural ecosystems contribute to climate change adaptation and mitigation?	yes	yes	3	experienced	Male	palaeo	Yes	mass.mail
20	Climate Change	20. How will climate change affect the distribution and impacts of climate-dependent disturbance regimes, such as fire?	no	yes	3	experienced	Male	palaeo	Yes	mass.mail
21	Climate Change	21. How will climate change affect global food production, and what are the resulting consequences for ecosystems and agrobiodiversity?	no	yes	3	experienced	Male	palaeo	Yes	mass.mail
22	Climate Change	22. How does biodiversity shape social resilience to the effects of climate change?	no	yes	3	experienced	Male	palaeo	Yes	mass.mail
23	Technological Change	23. How might nanotechnology have positive or negative impacts on biodiversity conservation?	no	no	3	experienced	Male	palaeo	Yes	mass.mail
24	Technological Change	24. How do the type, location, and associated mitigation measures of renewable energy technologies affect biodiversity?	no	no	3	experienced	Male	palaeo	Yes	mass.mail
25	Technological Change	25. What are the direct and indirect impacts of genetically modified organisms on biodiversity?	no	no	3	experienced	Male	palaeo	Yes	mass.mail
26	Technological Change	26. What are the implications for land use and biodiversity of the new and emerging “bioeconomy” markets (crops for pharmaceuticals, plastics, adhesives, etc.)?	no	no	3	experienced	Male	palaeo	Yes	mass.mail
27	Protected Areas	27. How effective are different types of protected areas (e.g., strict nature reserves, hunting reserves, and national parks) at conserving biodiversity and providing ecosystem services?	no	no	3	experienced	Male	palaeo	Yes	mass.mail
28	Protected Areas	28. What is the management cost per hectare required to manage protected areas effectively, and how does this vary with management category, geography, and threat?	no	no	3	experienced	Male	palaeo	Yes	mass.mail
29	Protected Areas	29. What are the human well-being costs and benefits of protected areas, how are these distributed, and how do they vary with governance, resource tenure arrangements, and site characteristics?	no	no	3	experienced	Male	palaeo	Yes	mass.mail
30	Protected Areas	30. How does the management of protected areas affect conservation beyond the boundaries of the protected area, such as through the displacement of human populations, hunting, or fishing?	no	no	3	experienced	Male	palaeo	Yes	mass.mail
31	Ecosystem Management and Restoration	31. What is the trade-off for biodiversity between balancing production of natural resources from intensive management systems, such as plantation forestry and aquaculture, versus harvesting those resources from more natural ecosystems?	no	no	3	experienced	Male	palaeo	Yes	mass.mail
32	Ecosystem Management and Restoration	32. What was the condition of ecosystems before significant human disruption, and how can this knowledge be used to improve current and future management?	yes	yes	3	experienced	Male	palaeo	Yes	mass.mail
33	Ecosystem Management and Restoration	33. What, and where, are the significant opportunities for large-scale ecosystem restoration that benefits biodiversity and human well-being?	no	yes	3	experienced	Male	palaeo	Yes	mass.mail
34	Ecosystem Management and Restoration	34. How can ecosystem management systems be designed to better emulate natural processes, notably natural disturbance regimes, and to what extent does this improve conservation effectiveness?	yes	yes	3	experienced	Male	palaeo	Yes	mass.mail
35	Ecosystem Management and Restoration	35. To what extent, and under what conditions, does the integration of marine, terrestrial, and freshwater ecosystems within conservation plans yield better outcomes than plans based on single realms?	no	no	3	experienced	Male	palaeo	Yes	mass.mail
36	Ecosystem Management and Restoration	36. What spatial pattern of human settlement (e.g., clustered vs. dispersed) has the least impact on biodiversity?	no	yes	3	experienced	Male	palaeo	Yes	mass.mail
37	Ecosystem Management and Restoration	37. What is the contribution of areas that are intensively managed for production of commodities (such as food, timber, or biofuels) to conservation of biodiversity at the landscape scale?	no	no	3	experienced	Male	palaeo	Yes	mass.mail
38	Ecosystem Management and Restoration	38. How can an understanding of factors affecting household decisions to invest in different naturalresource- based productive activities (e.g., agriculture, fishing, or hunting) be used to predict the biodiversity impacts of household responses to environmental change?	no	no	3	experienced	Male	palaeo	Yes	mass.mail
39	Terrestrial Ecosystems	39. What are the impacts on biodiversity and ecosystem services of biofuel production and how will these vary by feedstock type, location, objective, and technology applied?	no	no	3	experienced	Male	palaeo	Yes	mass.mail
40	Terrestrial Ecosystems	40. Under what conditions can agricultural intensification contribute to conserving overall biodiversity by reducing pressure to convert natural ecosystems?	no	no	3	experienced	Male	palaeo	Yes	mass.mail
41	Terrestrial Ecosystems	41. What are the impacts (on and off site) on agricultural returns and biodiversity of “biodiversity-friendly” agricultural practices, such as organic, minimum tillage, and agroenvironment schemes?	no	yes	3	experienced	Male	palaeo	Yes	mass.mail
42	Terrestrial Ecosystems	42. Under what circumstances can afforestation, reforestation, and reduced emissions from deforestation and degradation (REDD) benefit biodiversity conservation, reduce emissions, and provide sustainable livelihoods?	no	no	3	experienced	Male	palaeo	Yes	mass.mail
43	Terrestrial Ecosystems	43. How do different forms of forest governance influence biodiversity conservation outcomes and the implementation of REDD?	no	no	3	experienced	Male	palaeo	Yes	mass.mail
44	Terrestrial Ecosystems	44. How are arid and semiarid ecosystems affected by the interaction of multiple stressors such as grazing by domestic livestock, soil erosion, and drought?	no	no	3	experienced	Male	palaeo	Yes	mass.mail
45	Terrestrial Ecosystems	45. What are the contributions of urban nature reserves and other green amenity spaces, such as golf courses, to biodiversity conservation, and how can these be enhanced?	no	no	3	experienced	Male	palaeo	Yes	mass.mail
46	Marine Ecosystems	46. How will ocean acidification affect marine biodiversity and ecosystem function, and what measures could mitigate these effects?	yes	yes	3	experienced	Male	palaeo	Yes	mass.mail
47	Marine Ecosystems	47. What are the ecological, social, and economic impacts resulting from the expansion of freshwater and marine aquaculture?	no	no	3	experienced	Male	palaeo	Yes	mass.mail
48	Marine Ecosystems	48. Which management actions are most effective for ensuring the long-term survival of coral reefs in response to the combined impacts of climate change and other existing stressors?	no	no	3	experienced	Male	palaeo	Yes	mass.mail
49	Marine Ecosystems	49. Which management approaches to fisheries are most effective at mitigating the impacts of fish extraction and fishing gear on nontarget species and their habitats?	no	no	3	experienced	Male	palaeo	Yes	mass.mail
50	Marine Ecosystems	50. How does the effectiveness of marine protected areas vary with biological, physical, and social factors and with connectivity to other protected areas?	no	no	3	experienced	Male	palaeo	Yes	mass.mail
51	Marine Ecosystems	51. What will be the impacts of climate change on phytoplankton and oceanic productivity, and what will be the feedbacks of these impacts on the climate?	yes	yes	3	experienced	Male	palaeo	Yes	mass.mail
52	Marine Ecosystems	52. How will multiple stressors, especially fishing, pollution, sea temperature fluctuations, acidification, and diseases, interact to affect marine ecosystems?	no	no	3	experienced	Male	palaeo	Yes	mass.mail
53	Marine Ecosystems	53. Which mechanisms are most effective at conserving biodiversity in ocean areas occurring outside the legal jurisdiction of any single country?	no	no	3	experienced	Male	palaeo	Yes	mass.mail
54	Freshwater Ecosystems	54. How can freshwater biodiversity and ecosystem service values best be incorporated in the design of water-provisioning schemes for direct human use and food production?	no	no	3	experienced	Male	palaeo	Yes	mass.mail
55	Freshwater Ecosystems	55. Which aquatic species and communities are most vulnerable to human impacts, and how would their degradation affect the provision of ecosystem services?	no	no	3	experienced	Male	palaeo	Yes	mass.mail
56	Freshwater Ecosystems	56. Where will the impacts of global climate change on hydrology be most extreme, and how might they affect freshwater species and the ability of wetlands and inland waters to deliver ecosystem services?	no	yes	3	experienced	Male	palaeo	Yes	mass.mail
57	Freshwater Ecosystems	57. Which multinational governance, cross-sector cooperation arrangements, and finance mechanisms will make freshwater ecosystem management more effective and reduce international conflicts over water?	no	no	3	experienced	Male	palaeo	Yes	mass.mail
58	Freshwater Ecosystems	58. How does investment in restoration of wetlands and riparian areas compare with construction of dams and flood defenses in providing cost-effective improvements in flood management and the storage and retention of water for domestic, industrial, and agricultural use?	no	no	3	experienced	Male	palaeo	Yes	mass.mail
59	Species Management	59. Under what conditions is trade in captive or wildharvested species beneficial for wild populations of the traded species?	no	no	3	experienced	Male	palaeo	Yes	mass.mail
60	Species Management	60. What information is required to enable responsible authorities to decide when and how to manage nonnative species?	no	no	3	experienced	Male	palaeo	Yes	mass.mail
61	Species Management	61. What is the relative effectiveness of different methods for facilitating movement of a species among disjunct patches of its habitat?	no	no	3	experienced	Male	palaeo	Yes	mass.mail
62	Species Management	62. What is the cost-effectiveness of different contributions to species conservation programs such as education, captive breeding, and habitat management?	no	no	3	experienced	Male	palaeo	Yes	mass.mail
63	Species Management	63. What are the ecosystem impacts of efforts to conserve charismatic, flagship, or umbrella species?	no	no	3	experienced	Male	palaeo	Yes	mass.mail
64	Species Management	64. What are the likely risks, costs, and benefits of reintroducing and translocating species as a response to climate change?	yes	yes	3	experienced	Male	palaeo	Yes	mass.mail
65	Species Management	65. What are the most effective approaches for reversing range and population collapse in top predators, large herbivores, and other species that exert disproportionate effects on ecosystem structure and function?	no	no	3	experienced	Male	palaeo	Yes	mass.mail
66	Species Management	66. How can we best manage diseases that have the potential to move among wild species, domestic species, and people?	no	no	3	experienced	Male	palaeo	Yes	mass.mail
67	Organizational Systems and Processes	67. How do the characteristics of the organizations (e.g., government vs. nongovernment) and their funding (e.g., amount and duration of funds) shape the effectiveness of conservation interventions?	no	no	3	experienced	Male	palaeo	Yes	mass.mail
68	Organizational Systems and Processes	68. What factors affect the extent to which practitioners integrate consideration of human needs and preferences into policy and practice?	no	no	3	experienced	Male	palaeo	Yes	mass.mail
69	Organizational Systems and Processes	69. What is the cost-effectiveness of different approaches for rapidly expanding professional conservation capacity, and how does this vary with circumstances and among countries?	no	no	3	experienced	Male	palaeo	Yes	mass.mail
70	Organizational Systems and Processes	70. What is the effectiveness of the different mechanisms used to foster the evaluation and dissemination of conservation interventions?	no	no	3	experienced	Male	palaeo	Yes	mass.mail
71	Organizational Systems and Processes	71. How effective are the different strategies devised to integrate scientific knowledge into conservation policy and practice?	no	no	3	experienced	Male	palaeo	Yes	mass.mail
72	Organizational Systems and Processes	72. How effective are the different mechanisms used to promote data sharing and collaboration among individuals, conservationists, and conservation organizations?	no	no	3	experienced	Male	palaeo	Yes	mass.mail
73	Societal Context and Change	73. What are the impacts on biodiversity of shifting patterns and trends in human demography, economic activity, consumption, and technology?	no	yes	3	experienced	Male	palaeo	Yes	mass.mail
74	Societal Context and Change	74. How does the relationship between economic growth and biodiversity vary across scales, among different types of ecosystems, and with the type of economic activity?	no	no	3	experienced	Male	palaeo	Yes	mass.mail
75	Societal Context and Change	75. What are the direct and indirect impacts of armed conflict on biodiversity?	no	no	3	experienced	Male	palaeo	Yes	mass.mail
76	Societal Context and Change	76. What are the biodiversity impacts of changes in energy prices?	no	no	3	experienced	Male	palaeo	Yes	mass.mail
77	Societal Context and Change	77. How do resource tenure systems shape conservation outcomes in different social and ecological contexts?	no	no	3	experienced	Male	palaeo	Yes	mass.mail
78	Societal Context and Change	78. What are the impacts of international trade agreements and related policy instruments on biodiversity?	no	no	3	experienced	Male	palaeo	Yes	mass.mail
79	Societal Context and Change	79. How do economic subsidies affect biodiversity within the recipient country and elsewhere?	no	no	3	experienced	Male	palaeo	Yes	mass.mail
80	Societal Context and Change	80. How does corruption influence the effectiveness of conservation, and what are the most effective ways of preventing negative consequences?	no	no	3	experienced	Male	palaeo	Yes	mass.mail
81	Societal Context and Change	81. What are the conservation impacts of improved access to education, employment, and reproductive choice?	no	no	3	experienced	Male	palaeo	Yes	mass.mail
82	Societal Context and Change	82. What is the relationship between individuals learning about environmental problems and their conservation attitudes, knowledge, beliefs, and behaviors?	no	no	3	experienced	Male	palaeo	Yes	mass.mail
83	Societal Context and Change	83. What are the impacts of increasing human dissociation from nature on the conservation of biodiversity?	no	no	3	experienced	Male	palaeo	Yes	mass.mail
84	Societal Context and Change	84. What are the effects of changes in human patterns of food consumption on biodiversity (e.g., shift from bushmeat to domestic meat and from fish to plantbased protein), and how are such human patterns of food consumption shaped by education programs, financial incentives, and other policy instruments?	no	no	3	experienced	Male	palaeo	Yes	mass.mail
85	Societal Context and Change	85. What factors shape human (in)tolerance of the presence and activities ofwild animals, especially where those animals induce human–wildlife conflict?	no	no	3	experienced	Male	palaeo	Yes	mass.mail
86	Impacts of Conservation Interventions	86. What have been the impacts on biodiversity of the Convention on Biological Diversity 2010 targets, and what objectives, mechanism, time frame, and means of measurement would be most effective for future targets?	no	no	3	experienced	Male	palaeo	Yes	mass.mail
87	Impacts of Conservation Interventions	87. How do different values (e.g., use vs. preservation) and the framing of these values (e.g., ecosystem services vs. species) motivate policy makers to assign public resources to conservation programs and policies?	no	no	3	experienced	Male	palaeo	Yes	mass.mail
88	Impacts of Conservation Interventions	88. What factors shape individual and state compliance with local, national, and international conservation regimes?	no	no	3	experienced	Male	palaeo	Yes	mass.mail
89	Impacts of Conservation Interventions	89. What are the consequences of investment in improving knowledge (e.g., status, nature of threat, and effectiveness of interventions) versus expenditure on conservation action, and how does this differ among conservation issues?	no	no	3	experienced	Male	palaeo	Yes	mass.mail
90	Impacts of Conservation Interventions	90. What are the impacts on biodiversity and human well-being of differing approaches to devolving the responsibility for natural resource management?	no	no	3	experienced	Male	palaeo	Yes	mass.mail
91	Impacts of Conservation Interventions	91. What are the impacts of different conservation incentive programs on biodiversity and human wellbeing?	no	no	3	experienced	Male	palaeo	Yes	mass.mail
92	Impacts of Conservation Interventions	92. How does public involvement, especially of marginalized groups, in conservation decision making shape the effectiveness of conservation interventions?	no	no	3	experienced	Male	palaeo	Yes	mass.mail
93	Impacts of Conservation Interventions	93. What are the impacts of free, prior, and informed consent policies on the emergence, evolution, and performance of conservation interventions?	no	no	3	experienced	Male	palaeo	Yes	mass.mail
94	Impacts of Conservation Interventions	94. How does providing information to resource users affect individual behavior and support for collective restrictions, and how does the effect vary with different means of providing the information?	no	no	3	experienced	Male	palaeo	Yes	mass.mail
95	Impacts of Conservation Interventions	95. What are the conservation impacts of corporate social responsibility regimes that are biodiversityoriented?	no	no	3	experienced	Male	palaeo	Yes	mass.mail
96	Impacts of Conservation Interventions	96. What are the social impacts of conservation interventions, and how and why do these impacts vary among social groups (e.g., elites, poor, women, and indigenous)?	no	no	3	experienced	Male	palaeo	Yes	mass.mail
97	Impacts of Conservation Interventions	97. What factors shape the likelihood and extent of formal recognition of customary rights and traditional institutions as the basis for conservation policy and practices, and what are the impacts of this formal recognition on conservation outcomes?	no	no	3	experienced	Male	palaeo	Yes	mass.mail
98	Impacts of Conservation Interventions	98. What are the most cost-effectivemeans of encouraging broad, long-lasting, and active societal support and action for conservation in different contexts and among different actors?	no	no	3	experienced	Male	palaeo	Yes	mass.mail
99	Impacts of Conservation Interventions	99. What has been the effect of environmental impact assessments on biodiversity conservation?	no	no	3	experienced	Male	palaeo	Yes	mass.mail
100	Impacts of Conservation Interventions	100. What mechanisms best promote the use of local ideas and knowledge in conservation programs in ways that enhance biodiversity outcomes?	no	no	3	experienced	Male	palaeo	Yes	mass.mail
1	Ecosystem Function and Services	Do critical thresholds exist at which the loss of species diversity, or the loss of particular species, disrupts ecosystem functions and services, and how can these thresholds be predicted?	yes	yes	4	postdoc	Male	palaeo	Yes	mass.mail
2	Ecosystem Function and Services	What is the effectiveness of different methods for the assessment of ecosystem services?	yes	yes	4	postdoc	Male	palaeo	Yes	mass.mail
3	Ecosystem Function and Services	How can biodiversity considerations be integrated into economic policies to reflect the monetary and nonmonetary value of biodiversity, ecosystem processes, goods, and services?	yes	yes	4	postdoc	Male	palaeo	Yes	mass.mail
4	Ecosystem Function and Services	How can ecosystems be managed to increase protection of humans and biodiversity from extreme events?	no	yes	4	postdoc	Male	palaeo	Yes	mass.mail
5	Ecosystem Function and Services	How, where, and when has biodiversity loss affected human welfare?	no	yes	4	postdoc	Male	palaeo	Yes	mass.mail
6	Ecosystem Function and Services	What strategies for distributing the material benefits derived from biodiversity most effectively foster environmental stewardship and biodiversity conservation?	no	no	4	postdoc	Male	palaeo	Yes	mass.mail
7	Ecosystem Function and Services	How can protected area networks be designed to increase carbon storage benefits and mitigate climate impacts, with these benefits as incentives to support conservation actions?	no	yes	4	postdoc	Male	palaeo	Yes	mass.mail
8	Ecosystem Function and Services	How does soil biodiversity contribute to the extent and persistence of ecosystem services, including agricultural productivity?	yes	yes	4	postdoc	Male	palaeo	Yes	mass.mail
9	Climate Change	9. What impact will the melting of polar ice and a reduction in permafrost have on the human use of high-latitude ecosystems, and how will these changes in human use affect biodiversity?	no	yes	4	postdoc	Male	palaeo	Yes	mass.mail
10	Climate Change	10. Which elements of biodiversity in which locations are most vulnerable to climate change, including extreme events?	yes	yes	4	postdoc	Male	palaeo	Yes	mass.mail
11	Climate Change	11. How is the resilience of ecosystems to climate change affected by human activities and interventions?	no	yes	4	postdoc	Male	palaeo	Yes	mass.mail
12	Climate Change	12. What factors determine the rates at which coastal ecosystems can respond to sea-level rise, and which of these are amenable to management?	yes	yes	4	postdoc	Male	palaeo	Yes	mass.mail
13	Climate Change	13. How will climate change, together with other environmental stressors, alter the distribution and prevalence of diseases of wild species?	yes	yes	4	postdoc	Male	palaeo	Yes	mass.mail
14	Climate Change	14. How will human responses to climate change (e.g., changes in agriculture, resource conflicts, and migration) affect biodiversity?	no	yes	4	postdoc	Male	palaeo	Yes	mass.mail
15	Climate Change	15. How might biodiversity policies and management practices be modified and implemented to accommodate climate change?	yes	yes	4	postdoc	Male	palaeo	Yes	mass.mail
16	Climate Change	16. How might emerging carbon markets affect biodiversity through their impacts on the protection, management, and creation of habitats?	no	no	4	postdoc	Male	palaeo	Yes	mass.mail
17	Climate Change	17. What are the potential effects of feedbacks between climate change and ecosystem dynamics (e.g., drought, forest dieback, and coral bleaching) on the effectiveness of policy measures to sequester carbon and protect biodiversity?	no	no	4	postdoc	Male	palaeo	Yes	mass.mail
18	Climate Change	18. How much carbon is sequestered by different ecosystems, including their soils, and how can these ecosystems be managed to contribute most effectively to the mitigation of climate change?	yes	yes	4	postdoc	Male	palaeo	Yes	mass.mail
19	Climate Change	19. How, where, and to what extent can natural and seminatural ecosystems contribute to climate change adaptation and mitigation?	yes	yes	4	postdoc	Male	palaeo	Yes	mass.mail
20	Climate Change	20. How will climate change affect the distribution and impacts of climate-dependent disturbance regimes, such as fire?	yes	yes	4	postdoc	Male	palaeo	Yes	mass.mail
21	Climate Change	21. How will climate change affect global food production, and what are the resulting consequences for ecosystems and agrobiodiversity?	no	yes	4	postdoc	Male	palaeo	Yes	mass.mail
22	Climate Change	22. How does biodiversity shape social resilience to the effects of climate change?	no	no	4	postdoc	Male	palaeo	Yes	mass.mail
23	Technological Change	23. How might nanotechnology have positive or negative impacts on biodiversity conservation?	no	no	4	postdoc	Male	palaeo	Yes	mass.mail
24	Technological Change	24. How do the type, location, and associated mitigation measures of renewable energy technologies affect biodiversity?	no	no	4	postdoc	Male	palaeo	Yes	mass.mail
25	Technological Change	25. What are the direct and indirect impacts of genetically modified organisms on biodiversity?	no	no	4	postdoc	Male	palaeo	Yes	mass.mail
26	Technological Change	26. What are the implications for land use and biodiversity of the new and emerging “bioeconomy” markets (crops for pharmaceuticals, plastics, adhesives, etc.)?	no	no	4	postdoc	Male	palaeo	Yes	mass.mail
27	Protected Areas	27. How effective are different types of protected areas (e.g., strict nature reserves, hunting reserves, and national parks) at conserving biodiversity and providing ecosystem services?	no	yes	4	postdoc	Male	palaeo	Yes	mass.mail
28	Protected Areas	28. What is the management cost per hectare required to manage protected areas effectively, and how does this vary with management category, geography, and threat?	no	no	4	postdoc	Male	palaeo	Yes	mass.mail
29	Protected Areas	29. What are the human well-being costs and benefits of protected areas, how are these distributed, and how do they vary with governance, resource tenure arrangements, and site characteristics?	no	no	4	postdoc	Male	palaeo	Yes	mass.mail
30	Protected Areas	30. How does the management of protected areas affect conservation beyond the boundaries of the protected area, such as through the displacement of human populations, hunting, or fishing?	no	yes	4	postdoc	Male	palaeo	Yes	mass.mail
31	Ecosystem Management and Restoration	31. What is the trade-off for biodiversity between balancing production of natural resources from intensive management systems, such as plantation forestry and aquaculture, versus harvesting those resources from more natural ecosystems?	no	yes	4	postdoc	Male	palaeo	Yes	mass.mail
32	Ecosystem Management and Restoration	32. What was the condition of ecosystems before significant human disruption, and how can this knowledge be used to improve current and future management?	yes	yes	4	postdoc	Male	palaeo	Yes	mass.mail
33	Ecosystem Management and Restoration	33. What, and where, are the significant opportunities for large-scale ecosystem restoration that benefits biodiversity and human well-being?	no	yes	4	postdoc	Male	palaeo	Yes	mass.mail
34	Ecosystem Management and Restoration	34. How can ecosystem management systems be designed to better emulate natural processes, notably natural disturbance regimes, and to what extent does this improve conservation effectiveness?	yes	yes	4	postdoc	Male	palaeo	Yes	mass.mail
35	Ecosystem Management and Restoration	35. To what extent, and under what conditions, does the integration of marine, terrestrial, and freshwater ecosystems within conservation plans yield better outcomes than plans based on single realms?	no	no	4	postdoc	Male	palaeo	Yes	mass.mail
36	Ecosystem Management and Restoration	36. What spatial pattern of human settlement (e.g., clustered vs. dispersed) has the least impact on biodiversity?	no	yes	4	postdoc	Male	palaeo	Yes	mass.mail
37	Ecosystem Management and Restoration	37. What is the contribution of areas that are intensively managed for production of commodities (such as food, timber, or biofuels) to conservation of biodiversity at the landscape scale?	no	no	4	postdoc	Male	palaeo	Yes	mass.mail
38	Ecosystem Management and Restoration	38. How can an understanding of factors affecting household decisions to invest in different naturalresource- based productive activities (e.g., agriculture, fishing, or hunting) be used to predict the biodiversity impacts of household responses to environmental change?	no	no	4	postdoc	Male	palaeo	Yes	mass.mail
39	Terrestrial Ecosystems	39. What are the impacts on biodiversity and ecosystem services of biofuel production and how will these vary by feedstock type, location, objective, and technology applied?	no	no	4	postdoc	Male	palaeo	Yes	mass.mail
40	Terrestrial Ecosystems	40. Under what conditions can agricultural intensification contribute to conserving overall biodiversity by reducing pressure to convert natural ecosystems?	no	yes	4	postdoc	Male	palaeo	Yes	mass.mail
41	Terrestrial Ecosystems	41. What are the impacts (on and off site) on agricultural returns and biodiversity of “biodiversity-friendly” agricultural practices, such as organic, minimum tillage, and agroenvironment schemes?	no	no	4	postdoc	Male	palaeo	Yes	mass.mail
42	Terrestrial Ecosystems	42. Under what circumstances can afforestation, reforestation, and reduced emissions from deforestation and degradation (REDD) benefit biodiversity conservation, reduce emissions, and provide sustainable livelihoods?	no	no	4	postdoc	Male	palaeo	Yes	mass.mail
43	Terrestrial Ecosystems	43. How do different forms of forest governance influence biodiversity conservation outcomes and the implementation of REDD?	no	no	4	postdoc	Male	palaeo	Yes	mass.mail
44	Terrestrial Ecosystems	44. How are arid and semiarid ecosystems affected by the interaction of multiple stressors such as grazing by domestic livestock, soil erosion, and drought?	no	yes	4	postdoc	Male	palaeo	Yes	mass.mail
45	Terrestrial Ecosystems	45. What are the contributions of urban nature reserves and other green amenity spaces, such as golf courses, to biodiversity conservation, and how can these be enhanced?	no	no	4	postdoc	Male	palaeo	Yes	mass.mail
46	Marine Ecosystems	46. How will ocean acidification affect marine biodiversity and ecosystem function, and what measures could mitigate these effects?	yes	yes	4	postdoc	Male	palaeo	Yes	mass.mail
47	Marine Ecosystems	47. What are the ecological, social, and economic impacts resulting from the expansion of freshwater and marine aquaculture?	no	no	4	postdoc	Male	palaeo	Yes	mass.mail
48	Marine Ecosystems	48. Which management actions are most effective for ensuring the long-term survival of coral reefs in response to the combined impacts of climate change and other existing stressors?	no	no	4	postdoc	Male	palaeo	Yes	mass.mail
49	Marine Ecosystems	49. Which management approaches to fisheries are most effective at mitigating the impacts of fish extraction and fishing gear on nontarget species and their habitats?	no	no	4	postdoc	Male	palaeo	Yes	mass.mail
50	Marine Ecosystems	50. How does the effectiveness of marine protected areas vary with biological, physical, and social factors and with connectivity to other protected areas?	no	no	4	postdoc	Male	palaeo	Yes	mass.mail
51	Marine Ecosystems	51. What will be the impacts of climate change on phytoplankton and oceanic productivity, and what will be the feedbacks of these impacts on the climate?	yes	yes	4	postdoc	Male	palaeo	Yes	mass.mail
52	Marine Ecosystems	52. How will multiple stressors, especially fishing, pollution, sea temperature fluctuations, acidification, and diseases, interact to affect marine ecosystems?	yes	yes	4	postdoc	Male	palaeo	Yes	mass.mail
53	Marine Ecosystems	53. Which mechanisms are most effective at conserving biodiversity in ocean areas occurring outside the legal jurisdiction of any single country?	no	no	4	postdoc	Male	palaeo	Yes	mass.mail
54	Freshwater Ecosystems	54. How can freshwater biodiversity and ecosystem service values best be incorporated in the design of water-provisioning schemes for direct human use and food production?	no	no	4	postdoc	Male	palaeo	Yes	mass.mail
55	Freshwater Ecosystems	55. Which aquatic species and communities are most vulnerable to human impacts, and how would their degradation affect the provision of ecosystem services?	no	yes	4	postdoc	Male	palaeo	Yes	mass.mail
56	Freshwater Ecosystems	56. Where will the impacts of global climate change on hydrology be most extreme, and how might they affect freshwater species and the ability of wetlands and inland waters to deliver ecosystem services?	yes	yes	4	postdoc	Male	palaeo	Yes	mass.mail
57	Freshwater Ecosystems	57. Which multinational governance, cross-sector cooperation arrangements, and finance mechanisms will make freshwater ecosystem management more effective and reduce international conflicts over water?	no	no	4	postdoc	Male	palaeo	Yes	mass.mail
58	Freshwater Ecosystems	58. How does investment in restoration of wetlands and riparian areas compare with construction of dams and flood defenses in providing cost-effective improvements in flood management and the storage and retention of water for domestic, industrial, and agricultural use?	no	no	4	postdoc	Male	palaeo	Yes	mass.mail
59	Species Management	59. Under what conditions is trade in captive or wildharvested species beneficial for wild populations of the traded species?	no	yes	4	postdoc	Male	palaeo	Yes	mass.mail
60	Species Management	60. What information is required to enable responsible authorities to decide when and how to manage nonnative species?	no	yes	4	postdoc	Male	palaeo	Yes	mass.mail
61	Species Management	61. What is the relative effectiveness of different methods for facilitating movement of a species among disjunct patches of its habitat?	no	yes	4	postdoc	Male	palaeo	Yes	mass.mail
62	Species Management	62. What is the cost-effectiveness of different contributions to species conservation programs such as education, captive breeding, and habitat management?	no	no	4	postdoc	Male	palaeo	Yes	mass.mail
63	Species Management	63. What are the ecosystem impacts of efforts to conserve charismatic, flagship, or umbrella species?	no	no	4	postdoc	Male	palaeo	Yes	mass.mail
64	Species Management	64. What are the likely risks, costs, and benefits of reintroducing and translocating species as a response to climate change?	yes	yes	4	postdoc	Male	palaeo	Yes	mass.mail
65	Species Management	65. What are the most effective approaches for reversing range and population collapse in top predators, large herbivores, and other species that exert disproportionate effects on ecosystem structure and function?	yes	yes	4	postdoc	Male	palaeo	Yes	mass.mail
66	Species Management	66. How can we best manage diseases that have the potential to move among wild species, domestic species, and people?	no	no	4	postdoc	Male	palaeo	Yes	mass.mail
67	Organizational Systems and Processes	67. How do the characteristics of the organizations (e.g., government vs. nongovernment) and their funding (e.g., amount and duration of funds) shape the effectiveness of conservation interventions?	no	no	4	postdoc	Male	palaeo	Yes	mass.mail
68	Organizational Systems and Processes	68. What factors affect the extent to which practitioners integrate consideration of human needs and preferences into policy and practice?	no	no	4	postdoc	Male	palaeo	Yes	mass.mail
69	Organizational Systems and Processes	69. What is the cost-effectiveness of different approaches for rapidly expanding professional conservation capacity, and how does this vary with circumstances and among countries?	no	no	4	postdoc	Male	palaeo	Yes	mass.mail
70	Organizational Systems and Processes	70. What is the effectiveness of the different mechanisms used to foster the evaluation and dissemination of conservation interventions?	no	no	4	postdoc	Male	palaeo	Yes	mass.mail
71	Organizational Systems and Processes	71. How effective are the different strategies devised to integrate scientific knowledge into conservation policy and practice?	no	no	4	postdoc	Male	palaeo	Yes	mass.mail
72	Organizational Systems and Processes	72. How effective are the different mechanisms used to promote data sharing and collaboration among individuals, conservationists, and conservation organizations?	no	no	4	postdoc	Male	palaeo	Yes	mass.mail
73	Societal Context and Change	73. What are the impacts on biodiversity of shifting patterns and trends in human demography, economic activity, consumption, and technology?	no	yes	4	postdoc	Male	palaeo	Yes	mass.mail
74	Societal Context and Change	74. How does the relationship between economic growth and biodiversity vary across scales, among different types of ecosystems, and with the type of economic activity?	no	yes	4	postdoc	Male	palaeo	Yes	mass.mail
75	Societal Context and Change	75. What are the direct and indirect impacts of armed conflict on biodiversity?	no	yes	4	postdoc	Male	palaeo	Yes	mass.mail
76	Societal Context and Change	76. What are the biodiversity impacts of changes in energy prices?	no	no	4	postdoc	Male	palaeo	Yes	mass.mail
77	Societal Context and Change	77. How do resource tenure systems shape conservation outcomes in different social and ecological contexts?	no	no	4	postdoc	Male	palaeo	Yes	mass.mail
78	Societal Context and Change	78. What are the impacts of international trade agreements and related policy instruments on biodiversity?	no	no	4	postdoc	Male	palaeo	Yes	mass.mail
79	Societal Context and Change	79. How do economic subsidies affect biodiversity within the recipient country and elsewhere?	no	no	4	postdoc	Male	palaeo	Yes	mass.mail
80	Societal Context and Change	80. How does corruption influence the effectiveness of conservation, and what are the most effective ways of preventing negative consequences?	no	no	4	postdoc	Male	palaeo	Yes	mass.mail
81	Societal Context and Change	81. What are the conservation impacts of improved access to education, employment, and reproductive choice?	no	no	4	postdoc	Male	palaeo	Yes	mass.mail
82	Societal Context and Change	82. What is the relationship between individuals learning about environmental problems and their conservation attitudes, knowledge, beliefs, and behaviors?	no	no	4	postdoc	Male	palaeo	Yes	mass.mail
83	Societal Context and Change	83. What are the impacts of increasing human dissociation from nature on the conservation of biodiversity?	no	no	4	postdoc	Male	palaeo	Yes	mass.mail
84	Societal Context and Change	84. What are the effects of changes in human patterns of food consumption on biodiversity (e.g., shift from bushmeat to domestic meat and from fish to plantbased protein), and how are such human patterns of food consumption shaped by education programs, financial incentives, and other policy instruments?	no	yes	4	postdoc	Male	palaeo	Yes	mass.mail
85	Societal Context and Change	85. What factors shape human (in)tolerance of the presence and activities ofwild animals, especially where those animals induce human–wildlife conflict?	no	yes	4	postdoc	Male	palaeo	Yes	mass.mail
86	Impacts of Conservation Interventions	86. What have been the impacts on biodiversity of the Convention on Biological Diversity 2010 targets, and what objectives, mechanism, time frame, and means of measurement would be most effective for future targets?	no	no	4	postdoc	Male	palaeo	Yes	mass.mail
87	Impacts of Conservation Interventions	87. How do different values (e.g., use vs. preservation) and the framing of these values (e.g., ecosystem services vs. species) motivate policy makers to assign public resources to conservation programs and policies?	no	no	4	postdoc	Male	palaeo	Yes	mass.mail
88	Impacts of Conservation Interventions	88. What factors shape individual and state compliance with local, national, and international conservation regimes?	no	no	4	postdoc	Male	palaeo	Yes	mass.mail
89	Impacts of Conservation Interventions	89. What are the consequences of investment in improving knowledge (e.g., status, nature of threat, and effectiveness of interventions) versus expenditure on conservation action, and how does this differ among conservation issues?	no	no	4	postdoc	Male	palaeo	Yes	mass.mail
90	Impacts of Conservation Interventions	90. What are the impacts on biodiversity and human well-being of differing approaches to devolving the responsibility for natural resource management?	no	no	4	postdoc	Male	palaeo	Yes	mass.mail
91	Impacts of Conservation Interventions	91. What are the impacts of different conservation incentive programs on biodiversity and human wellbeing?	no	no	4	postdoc	Male	palaeo	Yes	mass.mail
92	Impacts of Conservation Interventions	92. How does public involvement, especially of marginalized groups, in conservation decision making shape the effectiveness of conservation interventions?	no	no	4	postdoc	Male	palaeo	Yes	mass.mail
93	Impacts of Conservation Interventions	93. What are the impacts of free, prior, and informed consent policies on the emergence, evolution, and performance of conservation interventions?	no	no	4	postdoc	Male	palaeo	Yes	mass.mail
94	Impacts of Conservation Interventions	94. How does providing information to resource users affect individual behavior and support for collective restrictions, and how does the effect vary with different means of providing the information?	no	no	4	postdoc	Male	palaeo	Yes	mass.mail
95	Impacts of Conservation Interventions	95. What are the conservation impacts of corporate social responsibility regimes that are biodiversityoriented?	no	no	4	postdoc	Male	palaeo	Yes	mass.mail
96	Impacts of Conservation Interventions	96. What are the social impacts of conservation interventions, and how and why do these impacts vary among social groups (e.g., elites, poor, women, and indigenous)?	no	no	4	postdoc	Male	palaeo	Yes	mass.mail
97	Impacts of Conservation Interventions	97. What factors shape the likelihood and extent of formal recognition of customary rights and traditional institutions as the basis for conservation policy and practices, and what are the impacts of this formal recognition on conservation outcomes?	no	yes	4	postdoc	Male	palaeo	Yes	mass.mail
98	Impacts of Conservation Interventions	98. What are the most cost-effectivemeans of encouraging broad, long-lasting, and active societal support and action for conservation in different contexts and among different actors?	no	no	4	postdoc	Male	palaeo	Yes	mass.mail
99	Impacts of Conservation Interventions	99. What has been the effect of environmental impact assessments on biodiversity conservation?	no	no	4	postdoc	Male	palaeo	Yes	mass.mail
100	Impacts of Conservation Interventions	100. What mechanisms best promote the use of local ideas and knowledge in conservation programs in ways that enhance biodiversity outcomes?	no	no	4	postdoc	Male	palaeo	Yes	mass.mail
1	Ecosystem Function and Services	Do critical thresholds exist at which the loss of species diversity, or the loss of particular species, disrupts ecosystem functions and services, and how can these thresholds be predicted?	yes	yes	5	postdoc	Male	palaeo	No	mass.mail
2	Ecosystem Function and Services	What is the effectiveness of different methods for the assessment of ecosystem services?	no	no	5	postdoc	Male	palaeo	No	mass.mail
3	Ecosystem Function and Services	How can biodiversity considerations be integrated into economic policies to reflect the monetary and nonmonetary value of biodiversity, ecosystem processes, goods, and services?	no	no	5	postdoc	Male	palaeo	No	mass.mail
4	Ecosystem Function and Services	How can ecosystems be managed to increase protection of humans and biodiversity from extreme events?	no	no	5	postdoc	Male	palaeo	No	mass.mail
5	Ecosystem Function and Services	How, where, and when has biodiversity loss affected human welfare?	no	no	5	postdoc	Male	palaeo	No	mass.mail
6	Ecosystem Function and Services	What strategies for distributing the material benefits derived from biodiversity most effectively foster environmental stewardship and biodiversity conservation?	no	no	5	postdoc	Male	palaeo	No	mass.mail
7	Ecosystem Function and Services	How can protected area networks be designed to increase carbon storage benefits and mitigate climate impacts, with these benefits as incentives to support conservation actions?	no	no	5	postdoc	Male	palaeo	No	mass.mail
8	Ecosystem Function and Services	How does soil biodiversity contribute to the extent and persistence of ecosystem services, including agricultural productivity?	yes	yes	5	postdoc	Male	palaeo	No	mass.mail
9	Climate Change	9. What impact will the melting of polar ice and a reduction in permafrost have on the human use of high-latitude ecosystems, and how will these changes in human use affect biodiversity?	no	no	5	postdoc	Male	palaeo	No	mass.mail
10	Climate Change	10. Which elements of biodiversity in which locations are most vulnerable to climate change, including extreme events?	yes	yes	5	postdoc	Male	palaeo	No	mass.mail
11	Climate Change	11. How is the resilience of ecosystems to climate change affected by human activities and interventions?	no	no	5	postdoc	Male	palaeo	No	mass.mail
12	Climate Change	12. What factors determine the rates at which coastal ecosystems can respond to sea-level rise, and which of these are amenable to management?	yes	yes	5	postdoc	Male	palaeo	No	mass.mail
13	Climate Change	13. How will climate change, together with other environmental stressors, alter the distribution and prevalence of diseases of wild species?	no	yes	5	postdoc	Male	palaeo	No	mass.mail
14	Climate Change	14. How will human responses to climate change (e.g., changes in agriculture, resource conflicts, and migration) affect biodiversity?	no	no	5	postdoc	Male	palaeo	No	mass.mail
15	Climate Change	15. How might biodiversity policies and management practices be modified and implemented to accommodate climate change?	no	no	5	postdoc	Male	palaeo	No	mass.mail
16	Climate Change	16. How might emerging carbon markets affect biodiversity through their impacts on the protection, management, and creation of habitats?	no	no	5	postdoc	Male	palaeo	No	mass.mail
17	Climate Change	17. What are the potential effects of feedbacks between climate change and ecosystem dynamics (e.g., drought, forest dieback, and coral bleaching) on the effectiveness of policy measures to sequester carbon and protect biodiversity?	no	yes	5	postdoc	Male	palaeo	No	mass.mail
18	Climate Change	18. How much carbon is sequestered by different ecosystems, including their soils, and how can these ecosystems be managed to contribute most effectively to the mitigation of climate change?	no	yes	5	postdoc	Male	palaeo	No	mass.mail
19	Climate Change	19. How, where, and to what extent can natural and seminatural ecosystems contribute to climate change adaptation and mitigation?	no	no	5	postdoc	Male	palaeo	No	mass.mail
20	Climate Change	20. How will climate change affect the distribution and impacts of climate-dependent disturbance regimes, such as fire?	yes	yes	5	postdoc	Male	palaeo	No	mass.mail
21	Climate Change	21. How will climate change affect global food production, and what are the resulting consequences for ecosystems and agrobiodiversity?	no	no	5	postdoc	Male	palaeo	No	mass.mail
22	Climate Change	22. How does biodiversity shape social resilience to the effects of climate change?	no	no	5	postdoc	Male	palaeo	No	mass.mail
23	Technological Change	23. How might nanotechnology have positive or negative impacts on biodiversity conservation?	no	no	5	postdoc	Male	palaeo	No	mass.mail
24	Technological Change	24. How do the type, location, and associated mitigation measures of renewable energy technologies affect biodiversity?	no	no	5	postdoc	Male	palaeo	No	mass.mail
25	Technological Change	25. What are the direct and indirect impacts of genetically modified organisms on biodiversity?	no	no	5	postdoc	Male	palaeo	No	mass.mail
26	Technological Change	26. What are the implications for land use and biodiversity of the new and emerging “bioeconomy” markets (crops for pharmaceuticals, plastics, adhesives, etc.)?	no	no	5	postdoc	Male	palaeo	No	mass.mail
27	Protected Areas	27. How effective are different types of protected areas (e.g., strict nature reserves, hunting reserves, and national parks) at conserving biodiversity and providing ecosystem services?	no	no	5	postdoc	Male	palaeo	No	mass.mail
28	Protected Areas	28. What is the management cost per hectare required to manage protected areas effectively, and how does this vary with management category, geography, and threat?	no	no	5	postdoc	Male	palaeo	No	mass.mail
29	Protected Areas	29. What are the human well-being costs and benefits of protected areas, how are these distributed, and how do they vary with governance, resource tenure arrangements, and site characteristics?	no	no	5	postdoc	Male	palaeo	No	mass.mail
30	Protected Areas	30. How does the management of protected areas affect conservation beyond the boundaries of the protected area, such as through the displacement of human populations, hunting, or fishing?	no	no	5	postdoc	Male	palaeo	No	mass.mail
31	Ecosystem Management and Restoration	31. What is the trade-off for biodiversity between balancing production of natural resources from intensive management systems, such as plantation forestry and aquaculture, versus harvesting those resources from more natural ecosystems?	no	no	5	postdoc	Male	palaeo	No	mass.mail
32	Ecosystem Management and Restoration	32. What was the condition of ecosystems before significant human disruption, and how can this knowledge be used to improve current and future management?	yes	yes	5	postdoc	Male	palaeo	No	mass.mail
33	Ecosystem Management and Restoration	33. What, and where, are the significant opportunities for large-scale ecosystem restoration that benefits biodiversity and human well-being?	no	no	5	postdoc	Male	palaeo	No	mass.mail
34	Ecosystem Management and Restoration	34. How can ecosystem management systems be designed to better emulate natural processes, notably natural disturbance regimes, and to what extent does this improve conservation effectiveness?	no	no	5	postdoc	Male	palaeo	No	mass.mail
35	Ecosystem Management and Restoration	35. To what extent, and under what conditions, does the integration of marine, terrestrial, and freshwater ecosystems within conservation plans yield better outcomes than plans based on single realms?	no	no	5	postdoc	Male	palaeo	No	mass.mail
36	Ecosystem Management and Restoration	36. What spatial pattern of human settlement (e.g., clustered vs. dispersed) has the least impact on biodiversity?	no	no	5	postdoc	Male	palaeo	No	mass.mail
37	Ecosystem Management and Restoration	37. What is the contribution of areas that are intensively managed for production of commodities (such as food, timber, or biofuels) to conservation of biodiversity at the landscape scale?	no	no	5	postdoc	Male	palaeo	No	mass.mail
38	Ecosystem Management and Restoration	38. How can an understanding of factors affecting household decisions to invest in different naturalresource- based productive activities (e.g., agriculture, fishing, or hunting) be used to predict the biodiversity impacts of household responses to environmental change?	no	no	5	postdoc	Male	palaeo	No	mass.mail
39	Terrestrial Ecosystems	39. What are the impacts on biodiversity and ecosystem services of biofuel production and how will these vary by feedstock type, location, objective, and technology applied?	no	no	5	postdoc	Male	palaeo	No	mass.mail
40	Terrestrial Ecosystems	40. Under what conditions can agricultural intensification contribute to conserving overall biodiversity by reducing pressure to convert natural ecosystems?	no	no	5	postdoc	Male	palaeo	No	mass.mail
41	Terrestrial Ecosystems	41. What are the impacts (on and off site) on agricultural returns and biodiversity of “biodiversity-friendly” agricultural practices, such as organic, minimum tillage, and agroenvironment schemes?	no	no	5	postdoc	Male	palaeo	No	mass.mail
42	Terrestrial Ecosystems	42. Under what circumstances can afforestation, reforestation, and reduced emissions from deforestation and degradation (REDD) benefit biodiversity conservation, reduce emissions, and provide sustainable livelihoods?	no	no	5	postdoc	Male	palaeo	No	mass.mail
43	Terrestrial Ecosystems	43. How do different forms of forest governance influence biodiversity conservation outcomes and the implementation of REDD?	no	no	5	postdoc	Male	palaeo	No	mass.mail
44	Terrestrial Ecosystems	44. How are arid and semiarid ecosystems affected by the interaction of multiple stressors such as grazing by domestic livestock, soil erosion, and drought?	no	yes	5	postdoc	Male	palaeo	No	mass.mail
45	Terrestrial Ecosystems	45. What are the contributions of urban nature reserves and other green amenity spaces, such as golf courses, to biodiversity conservation, and how can these be enhanced?	no	no	5	postdoc	Male	palaeo	No	mass.mail
46	Marine Ecosystems	46. How will ocean acidification affect marine biodiversity and ecosystem function, and what measures could mitigate these effects?	yes	no	5	postdoc	Male	palaeo	No	mass.mail
47	Marine Ecosystems	47. What are the ecological, social, and economic impacts resulting from the expansion of freshwater and marine aquaculture?	no	no	5	postdoc	Male	palaeo	No	mass.mail
48	Marine Ecosystems	48. Which management actions are most effective for ensuring the long-term survival of coral reefs in response to the combined impacts of climate change and other existing stressors?	no	no	5	postdoc	Male	palaeo	No	mass.mail
49	Marine Ecosystems	49. Which management approaches to fisheries are most effective at mitigating the impacts of fish extraction and fishing gear on nontarget species and their habitats?	no	no	5	postdoc	Male	palaeo	No	mass.mail
50	Marine Ecosystems	50. How does the effectiveness of marine protected areas vary with biological, physical, and social factors and with connectivity to other protected areas?	no	no	5	postdoc	Male	palaeo	No	mass.mail
51	Marine Ecosystems	51. What will be the impacts of climate change on phytoplankton and oceanic productivity, and what will be the feedbacks of these impacts on the climate?	yes	yes	5	postdoc	Male	palaeo	No	mass.mail
52	Marine Ecosystems	52. How will multiple stressors, especially fishing, pollution, sea temperature fluctuations, acidification, and diseases, interact to affect marine ecosystems?	no	no	5	postdoc	Male	palaeo	No	mass.mail
53	Marine Ecosystems	53. Which mechanisms are most effective at conserving biodiversity in ocean areas occurring outside the legal jurisdiction of any single country?	no	no	5	postdoc	Male	palaeo	No	mass.mail
54	Freshwater Ecosystems	54. How can freshwater biodiversity and ecosystem service values best be incorporated in the design of water-provisioning schemes for direct human use and food production?	no	no	5	postdoc	Male	palaeo	No	mass.mail
55	Freshwater Ecosystems	55. Which aquatic species and communities are most vulnerable to human impacts, and how would their degradation affect the provision of ecosystem services?	no	no	5	postdoc	Male	palaeo	No	mass.mail
56	Freshwater Ecosystems	56. Where will the impacts of global climate change on hydrology be most extreme, and how might they affect freshwater species and the ability of wetlands and inland waters to deliver ecosystem services?	yes	yes	5	postdoc	Male	palaeo	No	mass.mail
57	Freshwater Ecosystems	57. Which multinational governance, cross-sector cooperation arrangements, and finance mechanisms will make freshwater ecosystem management more effective and reduce international conflicts over water?	no	no	5	postdoc	Male	palaeo	No	mass.mail
58	Freshwater Ecosystems	58. How does investment in restoration of wetlands and riparian areas compare with construction of dams and flood defenses in providing cost-effective improvements in flood management and the storage and retention of water for domestic, industrial, and agricultural use?	no	no	5	postdoc	Male	palaeo	No	mass.mail
59	Species Management	59. Under what conditions is trade in captive or wildharvested species beneficial for wild populations of the traded species?	no	no	5	postdoc	Male	palaeo	No	mass.mail
60	Species Management	60. What information is required to enable responsible authorities to decide when and how to manage nonnative species?	no	no	5	postdoc	Male	palaeo	No	mass.mail
61	Species Management	61. What is the relative effectiveness of different methods for facilitating movement of a species among disjunct patches of its habitat?	no	no	5	postdoc	Male	palaeo	No	mass.mail
62	Species Management	62. What is the cost-effectiveness of different contributions to species conservation programs such as education, captive breeding, and habitat management?	no	no	5	postdoc	Male	palaeo	No	mass.mail
63	Species Management	63. What are the ecosystem impacts of efforts to conserve charismatic, flagship, or umbrella species?	no	no	5	postdoc	Male	palaeo	No	mass.mail
64	Species Management	64. What are the likely risks, costs, and benefits of reintroducing and translocating species as a response to climate change?	no	no	5	postdoc	Male	palaeo	No	mass.mail
65	Species Management	65. What are the most effective approaches for reversing range and population collapse in top predators, large herbivores, and other species that exert disproportionate effects on ecosystem structure and function?	no	no	5	postdoc	Male	palaeo	No	mass.mail
66	Species Management	66. How can we best manage diseases that have the potential to move among wild species, domestic species, and people?	no	no	5	postdoc	Male	palaeo	No	mass.mail
67	Organizational Systems and Processes	67. How do the characteristics of the organizations (e.g., government vs. nongovernment) and their funding (e.g., amount and duration of funds) shape the effectiveness of conservation interventions?	no	no	5	postdoc	Male	palaeo	No	mass.mail
68	Organizational Systems and Processes	68. What factors affect the extent to which practitioners integrate consideration of human needs and preferences into policy and practice?	no	no	5	postdoc	Male	palaeo	No	mass.mail
69	Organizational Systems and Processes	69. What is the cost-effectiveness of different approaches for rapidly expanding professional conservation capacity, and how does this vary with circumstances and among countries?	no	no	5	postdoc	Male	palaeo	No	mass.mail
70	Organizational Systems and Processes	70. What is the effectiveness of the different mechanisms used to foster the evaluation and dissemination of conservation interventions?	no	no	5	postdoc	Male	palaeo	No	mass.mail
71	Organizational Systems and Processes	71. How effective are the different strategies devised to integrate scientific knowledge into conservation policy and practice?	no	no	5	postdoc	Male	palaeo	No	mass.mail
72	Organizational Systems and Processes	72. How effective are the different mechanisms used to promote data sharing and collaboration among individuals, conservationists, and conservation organizations?	no	no	5	postdoc	Male	palaeo	No	mass.mail
73	Societal Context and Change	73. What are the impacts on biodiversity of shifting patterns and trends in human demography, economic activity, consumption, and technology?	no	no	5	postdoc	Male	palaeo	No	mass.mail
74	Societal Context and Change	74. How does the relationship between economic growth and biodiversity vary across scales, among different types of ecosystems, and with the type of economic activity?	no	no	5	postdoc	Male	palaeo	No	mass.mail
75	Societal Context and Change	75. What are the direct and indirect impacts of armed conflict on biodiversity?	no	no	5	postdoc	Male	palaeo	No	mass.mail
76	Societal Context and Change	76. What are the biodiversity impacts of changes in energy prices?	no	no	5	postdoc	Male	palaeo	No	mass.mail
77	Societal Context and Change	77. How do resource tenure systems shape conservation outcomes in different social and ecological contexts?	no	no	5	postdoc	Male	palaeo	No	mass.mail
78	Societal Context and Change	78. What are the impacts of international trade agreements and related policy instruments on biodiversity?	no	no	5	postdoc	Male	palaeo	No	mass.mail
79	Societal Context and Change	79. How do economic subsidies affect biodiversity within the recipient country and elsewhere?	no	no	5	postdoc	Male	palaeo	No	mass.mail
80	Societal Context and Change	80. How does corruption influence the effectiveness of conservation, and what are the most effective ways of preventing negative consequences?	no	no	5	postdoc	Male	palaeo	No	mass.mail
81	Societal Context and Change	81. What are the conservation impacts of improved access to education, employment, and reproductive choice?	no	no	5	postdoc	Male	palaeo	No	mass.mail
82	Societal Context and Change	82. What is the relationship between individuals learning about environmental problems and their conservation attitudes, knowledge, beliefs, and behaviors?	no	no	5	postdoc	Male	palaeo	No	mass.mail
83	Societal Context and Change	83. What are the impacts of increasing human dissociation from nature on the conservation of biodiversity?	no	no	5	postdoc	Male	palaeo	No	mass.mail
84	Societal Context and Change	84. What are the effects of changes in human patterns of food consumption on biodiversity (e.g., shift from bushmeat to domestic meat and from fish to plantbased protein), and how are such human patterns of food consumption shaped by education programs, financial incentives, and other policy instruments?	no	no	5	postdoc	Male	palaeo	No	mass.mail
85	Societal Context and Change	85. What factors shape human (in)tolerance of the presence and activities ofwild animals, especially where those animals induce human–wildlife conflict?	no	no	5	postdoc	Male	palaeo	No	mass.mail
86	Impacts of Conservation Interventions	86. What have been the impacts on biodiversity of the Convention on Biological Diversity 2010 targets, and what objectives, mechanism, time frame, and means of measurement would be most effective for future targets?	no	no	5	postdoc	Male	palaeo	No	mass.mail
87	Impacts of Conservation Interventions	87. How do different values (e.g., use vs. preservation) and the framing of these values (e.g., ecosystem services vs. species) motivate policy makers to assign public resources to conservation programs and policies?	no	no	5	postdoc	Male	palaeo	No	mass.mail
88	Impacts of Conservation Interventions	88. What factors shape individual and state compliance with local, national, and international conservation regimes?	no	no	5	postdoc	Male	palaeo	No	mass.mail
89	Impacts of Conservation Interventions	89. What are the consequences of investment in improving knowledge (e.g., status, nature of threat, and effectiveness of interventions) versus expenditure on conservation action, and how does this differ among conservation issues?	no	no	5	postdoc	Male	palaeo	No	mass.mail
90	Impacts of Conservation Interventions	90. What are the impacts on biodiversity and human well-being of differing approaches to devolving the responsibility for natural resource management?	no	no	5	postdoc	Male	palaeo	No	mass.mail
91	Impacts of Conservation Interventions	91. What are the impacts of different conservation incentive programs on biodiversity and human wellbeing?	no	no	5	postdoc	Male	palaeo	No	mass.mail
92	Impacts of Conservation Interventions	92. How does public involvement, especially of marginalized groups, in conservation decision making shape the effectiveness of conservation interventions?	no	no	5	postdoc	Male	palaeo	No	mass.mail
93	Impacts of Conservation Interventions	93. What are the impacts of free, prior, and informed consent policies on the emergence, evolution, and performance of conservation interventions?	no	no	5	postdoc	Male	palaeo	No	mass.mail
94	Impacts of Conservation Interventions	94. How does providing information to resource users affect individual behavior and support for collective restrictions, and how does the effect vary with different means of providing the information?	no	no	5	postdoc	Male	palaeo	No	mass.mail
95	Impacts of Conservation Interventions	95. What are the conservation impacts of corporate social responsibility regimes that are biodiversityoriented?	no	no	5	postdoc	Male	palaeo	No	mass.mail
96	Impacts of Conservation Interventions	96. What are the social impacts of conservation interventions, and how and why do these impacts vary among social groups (e.g., elites, poor, women, and indigenous)?	no	no	5	postdoc	Male	palaeo	No	mass.mail
97	Impacts of Conservation Interventions	97. What factors shape the likelihood and extent of formal recognition of customary rights and traditional institutions as the basis for conservation policy and practices, and what are the impacts of this formal recognition on conservation outcomes?	no	no	5	postdoc	Male	palaeo	No	mass.mail
98	Impacts of Conservation Interventions	98. What are the most cost-effectivemeans of encouraging broad, long-lasting, and active societal support and action for conservation in different contexts and among different actors?	no	no	5	postdoc	Male	palaeo	No	mass.mail
99	Impacts of Conservation Interventions	99. What has been the effect of environmental impact assessments on biodiversity conservation?	no	no	5	postdoc	Male	palaeo	No	mass.mail
100	Impacts of Conservation Interventions	100. What mechanisms best promote the use of local ideas and knowledge in conservation programs in ways that enhance biodiversity outcomes?	no	no	5	postdoc	Male	palaeo	No	mass.mail
1	Ecosystem Function and Services	Do critical thresholds exist at which the loss of species diversity, or the loss of particular species, disrupts ecosystem functions and services, and how can these thresholds be predicted?	yes		6	experienced	Female	palaeo	No	mass.mail
2	Ecosystem Function and Services	What is the effectiveness of different methods for the assessment of ecosystem services?	yes		6	experienced	Female	palaeo	No	mass.mail
3	Ecosystem Function and Services	How can biodiversity considerations be integrated into economic policies to reflect the monetary and nonmonetary value of biodiversity, ecosystem processes, goods, and services?	yes		6	experienced	Female	palaeo	No	mass.mail
4	Ecosystem Function and Services	How can ecosystems be managed to increase protection of humans and biodiversity from extreme events?	yes		6	experienced	Female	palaeo	No	mass.mail
5	Ecosystem Function and Services	How, where, and when has biodiversity loss affected human welfare?	yes		6	experienced	Female	palaeo	No	mass.mail
6	Ecosystem Function and Services	What strategies for distributing the material benefits derived from biodiversity most effectively foster environmental stewardship and biodiversity conservation?	no		6	experienced	Female	palaeo	No	mass.mail
7	Ecosystem Function and Services	How can protected area networks be designed to increase carbon storage benefits and mitigate climate impacts, with these benefits as incentives to support conservation actions?	yes		6	experienced	Female	palaeo	No	mass.mail
8	Ecosystem Function and Services	How does soil biodiversity contribute to the extent and persistence of ecosystem services, including agricultural productivity?	no		6	experienced	Female	palaeo	No	mass.mail
9	Climate Change	9. What impact will the melting of polar ice and a reduction in permafrost have on the human use of high-latitude ecosystems, and how will these changes in human use affect biodiversity?	yes		6	experienced	Female	palaeo	No	mass.mail
10	Climate Change	10. Which elements of biodiversity in which locations are most vulnerable to climate change, including extreme events?	yes		6	experienced	Female	palaeo	No	mass.mail
11	Climate Change	11. How is the resilience of ecosystems to climate change affected by human activities and interventions?	no		6	experienced	Female	palaeo	No	mass.mail
12	Climate Change	12. What factors determine the rates at which coastal ecosystems can respond to sea-level rise, and which of these are amenable to management?	yes		6	experienced	Female	palaeo	No	mass.mail
13	Climate Change	13. How will climate change, together with other environmental stressors, alter the distribution and prevalence of diseases of wild species?	no		6	experienced	Female	palaeo	No	mass.mail
14	Climate Change	14. How will human responses to climate change (e.g., changes in agriculture, resource conflicts, and migration) affect biodiversity?	no		6	experienced	Female	palaeo	No	mass.mail
15	Climate Change	15. How might biodiversity policies and management practices be modified and implemented to accommodate climate change?	no		6	experienced	Female	palaeo	No	mass.mail
16	Climate Change	16. How might emerging carbon markets affect biodiversity through their impacts on the protection, management, and creation of habitats?	no		6	experienced	Female	palaeo	No	mass.mail
17	Climate Change	17. What are the potential effects of feedbacks between climate change and ecosystem dynamics (e.g., drought, forest dieback, and coral bleaching) on the effectiveness of policy measures to sequester carbon and protect biodiversity?	yes		6	experienced	Female	palaeo	No	mass.mail
18	Climate Change	18. How much carbon is sequestered by different ecosystems, including their soils, and how can these ecosystems be managed to contribute most effectively to the mitigation of climate change?	yes		6	experienced	Female	palaeo	No	mass.mail
19	Climate Change	19. How, where, and to what extent can natural and seminatural ecosystems contribute to climate change adaptation and mitigation?	yes		6	experienced	Female	palaeo	No	mass.mail
20	Climate Change	20. How will climate change affect the distribution and impacts of climate-dependent disturbance regimes, such as fire?	yes		6	experienced	Female	palaeo	No	mass.mail
21	Climate Change	21. How will climate change affect global food production, and what are the resulting consequences for ecosystems and agrobiodiversity?	no		6	experienced	Female	palaeo	No	mass.mail
22	Climate Change	22. How does biodiversity shape social resilience to the effects of climate change?	no		6	experienced	Female	palaeo	No	mass.mail
23	Technological Change	23. How might nanotechnology have positive or negative impacts on biodiversity conservation?	no		6	experienced	Female	palaeo	No	mass.mail
24	Technological Change	24. How do the type, location, and associated mitigation measures of renewable energy technologies affect biodiversity?	no		6	experienced	Female	palaeo	No	mass.mail
25	Technological Change	25. What are the direct and indirect impacts of genetically modified organisms on biodiversity?	no		6	experienced	Female	palaeo	No	mass.mail
26	Technological Change	26. What are the implications for land use and biodiversity of the new and emerging “bioeconomy” markets (crops for pharmaceuticals, plastics, adhesives, etc.)?	no		6	experienced	Female	palaeo	No	mass.mail
27	Protected Areas	27. How effective are different types of protected areas (e.g., strict nature reserves, hunting reserves, and national parks) at conserving biodiversity and providing ecosystem services?	no		6	experienced	Female	palaeo	No	mass.mail
28	Protected Areas	28. What is the management cost per hectare required to manage protected areas effectively, and how does this vary with management category, geography, and threat?	no		6	experienced	Female	palaeo	No	mass.mail
29	Protected Areas	29. What are the human well-being costs and benefits of protected areas, how are these distributed, and how do they vary with governance, resource tenure arrangements, and site characteristics?	no		6	experienced	Female	palaeo	No	mass.mail
30	Protected Areas	30. How does the management of protected areas affect conservation beyond the boundaries of the protected area, such as through the displacement of human populations, hunting, or fishing?	no		6	experienced	Female	palaeo	No	mass.mail
31	Ecosystem Management and Restoration	31. What is the trade-off for biodiversity between balancing production of natural resources from intensive management systems, such as plantation forestry and aquaculture, versus harvesting those resources from more natural ecosystems?	no		6	experienced	Female	palaeo	No	mass.mail
32	Ecosystem Management and Restoration	32. What was the condition of ecosystems before significant human disruption, and how can this knowledge be used to improve current and future management?	yes		6	experienced	Female	palaeo	No	mass.mail
33	Ecosystem Management and Restoration	33. What, and where, are the significant opportunities for large-scale ecosystem restoration that benefits biodiversity and human well-being?	no		6	experienced	Female	palaeo	No	mass.mail
34	Ecosystem Management and Restoration	34. How can ecosystem management systems be designed to better emulate natural processes, notably natural disturbance regimes, and to what extent does this improve conservation effectiveness?	no		6	experienced	Female	palaeo	No	mass.mail
35	Ecosystem Management and Restoration	35. To what extent, and under what conditions, does the integration of marine, terrestrial, and freshwater ecosystems within conservation plans yield better outcomes than plans based on single realms?	no		6	experienced	Female	palaeo	No	mass.mail
36	Ecosystem Management and Restoration	36. What spatial pattern of human settlement (e.g., clustered vs. dispersed) has the least impact on biodiversity?	no		6	experienced	Female	palaeo	No	mass.mail
37	Ecosystem Management and Restoration	37. What is the contribution of areas that are intensively managed for production of commodities (such as food, timber, or biofuels) to conservation of biodiversity at the landscape scale?	no		6	experienced	Female	palaeo	No	mass.mail
38	Ecosystem Management and Restoration	38. How can an understanding of factors affecting household decisions to invest in different naturalresource- based productive activities (e.g., agriculture, fishing, or hunting) be used to predict the biodiversity impacts of household responses to environmental change?	no		6	experienced	Female	palaeo	No	mass.mail
39	Terrestrial Ecosystems	39. What are the impacts on biodiversity and ecosystem services of biofuel production and how will these vary by feedstock type, location, objective, and technology applied?	no		6	experienced	Female	palaeo	No	mass.mail
40	Terrestrial Ecosystems	40. Under what conditions can agricultural intensification contribute to conserving overall biodiversity by reducing pressure to convert natural ecosystems?	no		6	experienced	Female	palaeo	No	mass.mail
41	Terrestrial Ecosystems	41. What are the impacts (on and off site) on agricultural returns and biodiversity of “biodiversity-friendly” agricultural practices, such as organic, minimum tillage, and agroenvironment schemes?	no		6	experienced	Female	palaeo	No	mass.mail
42	Terrestrial Ecosystems	42. Under what circumstances can afforestation, reforestation, and reduced emissions from deforestation and degradation (REDD) benefit biodiversity conservation, reduce emissions, and provide sustainable livelihoods?	no		6	experienced	Female	palaeo	No	mass.mail
43	Terrestrial Ecosystems	43. How do different forms of forest governance influence biodiversity conservation outcomes and the implementation of REDD?	no		6	experienced	Female	palaeo	No	mass.mail
44	Terrestrial Ecosystems	44. How are arid and semiarid ecosystems affected by the interaction of multiple stressors such as grazing by domestic livestock, soil erosion, and drought?	yes		6	experienced	Female	palaeo	No	mass.mail
45	Terrestrial Ecosystems	45. What are the contributions of urban nature reserves and other green amenity spaces, such as golf courses, to biodiversity conservation, and how can these be enhanced?	no		6	experienced	Female	palaeo	No	mass.mail
46	Marine Ecosystems	46. How will ocean acidification affect marine biodiversity and ecosystem function, and what measures could mitigate these effects?	yes		6	experienced	Female	palaeo	No	mass.mail
47	Marine Ecosystems	47. What are the ecological, social, and economic impacts resulting from the expansion of freshwater and marine aquaculture?	no		6	experienced	Female	palaeo	No	mass.mail
48	Marine Ecosystems	48. Which management actions are most effective for ensuring the long-term survival of coral reefs in response to the combined impacts of climate change and other existing stressors?	yes		6	experienced	Female	palaeo	No	mass.mail
49	Marine Ecosystems	49. Which management approaches to fisheries are most effective at mitigating the impacts of fish extraction and fishing gear on nontarget species and their habitats?	no		6	experienced	Female	palaeo	No	mass.mail
50	Marine Ecosystems	50. How does the effectiveness of marine protected areas vary with biological, physical, and social factors and with connectivity to other protected areas?	yes		6	experienced	Female	palaeo	No	mass.mail
51	Marine Ecosystems	51. What will be the impacts of climate change on phytoplankton and oceanic productivity, and what will be the feedbacks of these impacts on the climate?	yes		6	experienced	Female	palaeo	No	mass.mail
52	Marine Ecosystems	52. How will multiple stressors, especially fishing, pollution, sea temperature fluctuations, acidification, and diseases, interact to affect marine ecosystems?	yes		6	experienced	Female	palaeo	No	mass.mail
53	Marine Ecosystems	53. Which mechanisms are most effective at conserving biodiversity in ocean areas occurring outside the legal jurisdiction of any single country?	no		6	experienced	Female	palaeo	No	mass.mail
54	Freshwater Ecosystems	54. How can freshwater biodiversity and ecosystem service values best be incorporated in the design of water-provisioning schemes for direct human use and food production?	no		6	experienced	Female	palaeo	No	mass.mail
55	Freshwater Ecosystems	55. Which aquatic species and communities are most vulnerable to human impacts, and how would their degradation affect the provision of ecosystem services?	yes		6	experienced	Female	palaeo	No	mass.mail
56	Freshwater Ecosystems	56. Where will the impacts of global climate change on hydrology be most extreme, and how might they affect freshwater species and the ability of wetlands and inland waters to deliver ecosystem services?	yes		6	experienced	Female	palaeo	No	mass.mail
57	Freshwater Ecosystems	57. Which multinational governance, cross-sector cooperation arrangements, and finance mechanisms will make freshwater ecosystem management more effective and reduce international conflicts over water?	no		6	experienced	Female	palaeo	No	mass.mail
58	Freshwater Ecosystems	58. How does investment in restoration of wetlands and riparian areas compare with construction of dams and flood defenses in providing cost-effective improvements in flood management and the storage and retention of water for domestic, industrial, and agricultural use?	no		6	experienced	Female	palaeo	No	mass.mail
59	Species Management	59. Under what conditions is trade in captive or wildharvested species beneficial for wild populations of the traded species?	no		6	experienced	Female	palaeo	No	mass.mail
60	Species Management	60. What information is required to enable responsible authorities to decide when and how to manage nonnative species?	no		6	experienced	Female	palaeo	No	mass.mail
61	Species Management	61. What is the relative effectiveness of different methods for facilitating movement of a species among disjunct patches of its habitat?	no		6	experienced	Female	palaeo	No	mass.mail
62	Species Management	62. What is the cost-effectiveness of different contributions to species conservation programs such as education, captive breeding, and habitat management?	no		6	experienced	Female	palaeo	No	mass.mail
63	Species Management	63. What are the ecosystem impacts of efforts to conserve charismatic, flagship, or umbrella species?	no		6	experienced	Female	palaeo	No	mass.mail
64	Species Management	64. What are the likely risks, costs, and benefits of reintroducing and translocating species as a response to climate change?	yes		6	experienced	Female	palaeo	No	mass.mail
65	Species Management	65. What are the most effective approaches for reversing range and population collapse in top predators, large herbivores, and other species that exert disproportionate effects on ecosystem structure and function?	yes		6	experienced	Female	palaeo	No	mass.mail
66	Species Management	66. How can we best manage diseases that have the potential to move among wild species, domestic species, and people?	no		6	experienced	Female	palaeo	No	mass.mail
67	Organizational Systems and Processes	67. How do the characteristics of the organizations (e.g., government vs. nongovernment) and their funding (e.g., amount and duration of funds) shape the effectiveness of conservation interventions?	no		6	experienced	Female	palaeo	No	mass.mail
68	Organizational Systems and Processes	68. What factors affect the extent to which practitioners integrate consideration of human needs and preferences into policy and practice?	no		6	experienced	Female	palaeo	No	mass.mail
69	Organizational Systems and Processes	69. What is the cost-effectiveness of different approaches for rapidly expanding professional conservation capacity, and how does this vary with circumstances and among countries?	no		6	experienced	Female	palaeo	No	mass.mail
70	Organizational Systems and Processes	70. What is the effectiveness of the different mechanisms used to foster the evaluation and dissemination of conservation interventions?	no		6	experienced	Female	palaeo	No	mass.mail
71	Organizational Systems and Processes	71. How effective are the different strategies devised to integrate scientific knowledge into conservation policy and practice?	no		6	experienced	Female	palaeo	No	mass.mail
72	Organizational Systems and Processes	72. How effective are the different mechanisms used to promote data sharing and collaboration among individuals, conservationists, and conservation organizations?	no		6	experienced	Female	palaeo	No	mass.mail
73	Societal Context and Change	73. What are the impacts on biodiversity of shifting patterns and trends in human demography, economic activity, consumption, and technology?	no		6	experienced	Female	palaeo	No	mass.mail
74	Societal Context and Change	74. How does the relationship between economic growth and biodiversity vary across scales, among different types of ecosystems, and with the type of economic activity?	no		6	experienced	Female	palaeo	No	mass.mail
75	Societal Context and Change	75. What are the direct and indirect impacts of armed conflict on biodiversity?	no		6	experienced	Female	palaeo	No	mass.mail
76	Societal Context and Change	76. What are the biodiversity impacts of changes in energy prices?	no		6	experienced	Female	palaeo	No	mass.mail
77	Societal Context and Change	77. How do resource tenure systems shape conservation outcomes in different social and ecological contexts?	no		6	experienced	Female	palaeo	No	mass.mail
78	Societal Context and Change	78. What are the impacts of international trade agreements and related policy instruments on biodiversity?	no		6	experienced	Female	palaeo	No	mass.mail
79	Societal Context and Change	79. How do economic subsidies affect biodiversity within the recipient country and elsewhere?	no		6	experienced	Female	palaeo	No	mass.mail
80	Societal Context and Change	80. How does corruption influence the effectiveness of conservation, and what are the most effective ways of preventing negative consequences?	no		6	experienced	Female	palaeo	No	mass.mail
81	Societal Context and Change	81. What are the conservation impacts of improved access to education, employment, and reproductive choice?	no		6	experienced	Female	palaeo	No	mass.mail
82	Societal Context and Change	82. What is the relationship between individuals learning about environmental problems and their conservation attitudes, knowledge, beliefs, and behaviors?	no		6	experienced	Female	palaeo	No	mass.mail
83	Societal Context and Change	83. What are the impacts of increasing human dissociation from nature on the conservation of biodiversity?	no		6	experienced	Female	palaeo	No	mass.mail
84	Societal Context and Change	84. What are the effects of changes in human patterns of food consumption on biodiversity (e.g., shift from bushmeat to domestic meat and from fish to plantbased protein), and how are such human patterns of food consumption shaped by education programs, financial incentives, and other policy instruments?	no		6	experienced	Female	palaeo	No	mass.mail
85	Societal Context and Change	85. What factors shape human (in)tolerance of the presence and activities ofwild animals, especially where those animals induce human–wildlife conflict?	no		6	experienced	Female	palaeo	No	mass.mail
86	Impacts of Conservation Interventions	86. What have been the impacts on biodiversity of the Convention on Biological Diversity 2010 targets, and what objectives, mechanism, time frame, and means of measurement would be most effective for future targets?	no		6	experienced	Female	palaeo	No	mass.mail
87	Impacts of Conservation Interventions	87. How do different values (e.g., use vs. preservation) and the framing of these values (e.g., ecosystem services vs. species) motivate policy makers to assign public resources to conservation programs and policies?	no		6	experienced	Female	palaeo	No	mass.mail
88	Impacts of Conservation Interventions	88. What factors shape individual and state compliance with local, national, and international conservation regimes?	no		6	experienced	Female	palaeo	No	mass.mail
89	Impacts of Conservation Interventions	89. What are the consequences of investment in improving knowledge (e.g., status, nature of threat, and effectiveness of interventions) versus expenditure on conservation action, and how does this differ among conservation issues?	no		6	experienced	Female	palaeo	No	mass.mail
90	Impacts of Conservation Interventions	90. What are the impacts on biodiversity and human well-being of differing approaches to devolving the responsibility for natural resource management?	no		6	experienced	Female	palaeo	No	mass.mail
91	Impacts of Conservation Interventions	91. What are the impacts of different conservation incentive programs on biodiversity and human wellbeing?	no		6	experienced	Female	palaeo	No	mass.mail
92	Impacts of Conservation Interventions	92. How does public involvement, especially of marginalized groups, in conservation decision making shape the effectiveness of conservation interventions?	no		6	experienced	Female	palaeo	No	mass.mail
93	Impacts of Conservation Interventions	93. What are the impacts of free, prior, and informed consent policies on the emergence, evolution, and performance of conservation interventions?	no		6	experienced	Female	palaeo	No	mass.mail
94	Impacts of Conservation Interventions	94. How does providing information to resource users affect individual behavior and support for collective restrictions, and how does the effect vary with different means of providing the information?	no		6	experienced	Female	palaeo	No	mass.mail
95	Impacts of Conservation Interventions	95. What are the conservation impacts of corporate social responsibility regimes that are biodiversityoriented?	no		6	experienced	Female	palaeo	No	mass.mail
96	Impacts of Conservation Interventions	96. What are the social impacts of conservation interventions, and how and why do these impacts vary among social groups (e.g., elites, poor, women, and indigenous)?	no		6	experienced	Female	palaeo	No	mass.mail
97	Impacts of Conservation Interventions	97. What factors shape the likelihood and extent of formal recognition of customary rights and traditional institutions as the basis for conservation policy and practices, and what are the impacts of this formal recognition on conservation outcomes?	no		6	experienced	Female	palaeo	No	mass.mail
98	Impacts of Conservation Interventions	98. What are the most cost-effectivemeans of encouraging broad, long-lasting, and active societal support and action for conservation in different contexts and among different actors?	no		6	experienced	Female	palaeo	No	mass.mail
99	Impacts of Conservation Interventions	99. What has been the effect of environmental impact assessments on biodiversity conservation?	no		6	experienced	Female	palaeo	No	mass.mail
100	Impacts of Conservation Interventions	100. What mechanisms best promote the use of local ideas and knowledge in conservation programs in ways that enhance biodiversity outcomes?	no		6	experienced	Female	palaeo	No	mass.mail
1	Ecosystem Function and Services	Do critical thresholds exist at which the loss of species diversity, or the loss of particular species, disrupts ecosystem functions and services, and how can these thresholds be predicted?	yes	yes	7	postdoc	Female	palaeo	Yes	mass.mail
2	Ecosystem Function and Services	What is the effectiveness of different methods for the assessment of ecosystem services?	no	no	7	postdoc	Female	palaeo	Yes	mass.mail
3	Ecosystem Function and Services	How can biodiversity considerations be integrated into economic policies to reflect the monetary and nonmonetary value of biodiversity, ecosystem processes, goods, and services?	no	no	7	postdoc	Female	palaeo	Yes	mass.mail
4	Ecosystem Function and Services	How can ecosystems be managed to increase protection of humans and biodiversity from extreme events?	no	yes	7	postdoc	Female	palaeo	Yes	mass.mail
5	Ecosystem Function and Services	How, where, and when has biodiversity loss affected human welfare?	no	yes	7	postdoc	Female	palaeo	Yes	mass.mail
6	Ecosystem Function and Services	What strategies for distributing the material benefits derived from biodiversity most effectively foster environmental stewardship and biodiversity conservation?	no	no	7	postdoc	Female	palaeo	Yes	mass.mail
7	Ecosystem Function and Services	How can protected area networks be designed to increase carbon storage benefits and mitigate climate impacts, with these benefits as incentives to support conservation actions?	yes	yes	7	postdoc	Female	palaeo	Yes	mass.mail
8	Ecosystem Function and Services	How does soil biodiversity contribute to the extent and persistence of ecosystem services, including agricultural productivity?	no	yes	7	postdoc	Female	palaeo	Yes	mass.mail
9	Climate Change	9. What impact will the melting of polar ice and a reduction in permafrost have on the human use of high-latitude ecosystems, and how will these changes in human use affect biodiversity?	no	yes	7	postdoc	Female	palaeo	Yes	mass.mail
10	Climate Change	10. Which elements of biodiversity in which locations are most vulnerable to climate change, including extreme events?	yes	yes	7	postdoc	Female	palaeo	Yes	mass.mail
11	Climate Change	11. How is the resilience of ecosystems to climate change affected by human activities and interventions?	yes	yes	7	postdoc	Female	palaeo	Yes	mass.mail
12	Climate Change	12. What factors determine the rates at which coastal ecosystems can respond to sea-level rise, and which of these are amenable to management?	yes	yes	7	postdoc	Female	palaeo	Yes	mass.mail
13	Climate Change	13. How will climate change, together with other environmental stressors, alter the distribution and prevalence of diseases of wild species?	yes	yes	7	postdoc	Female	palaeo	Yes	mass.mail
14	Climate Change	14. How will human responses to climate change (e.g., changes in agriculture, resource conflicts, and migration) affect biodiversity?	no	yes	7	postdoc	Female	palaeo	Yes	mass.mail
15	Climate Change	15. How might biodiversity policies and management practices be modified and implemented to accommodate climate change?	yes	yes	7	postdoc	Female	palaeo	Yes	mass.mail
16	Climate Change	16. How might emerging carbon markets affect biodiversity through their impacts on the protection, management, and creation of habitats?	no	no	7	postdoc	Female	palaeo	Yes	mass.mail
17	Climate Change	17. What are the potential effects of feedbacks between climate change and ecosystem dynamics (e.g., drought, forest dieback, and coral bleaching) on the effectiveness of policy measures to sequester carbon and protect biodiversity?	yes	yes	7	postdoc	Female	palaeo	Yes	mass.mail
18	Climate Change	18. How much carbon is sequestered by different ecosystems, including their soils, and how can these ecosystems be managed to contribute most effectively to the mitigation of climate change?	yes	yes	7	postdoc	Female	palaeo	Yes	mass.mail
19	Climate Change	19. How, where, and to what extent can natural and seminatural ecosystems contribute to climate change adaptation and mitigation?	no	no	7	postdoc	Female	palaeo	Yes	mass.mail
20	Climate Change	20. How will climate change affect the distribution and impacts of climate-dependent disturbance regimes, such as fire?	yes	yes	7	postdoc	Female	palaeo	Yes	mass.mail
21	Climate Change	21. How will climate change affect global food production, and what are the resulting consequences for ecosystems and agrobiodiversity?	yes	yes	7	postdoc	Female	palaeo	Yes	mass.mail
22	Climate Change	22. How does biodiversity shape social resilience to the effects of climate change?	no	no	7	postdoc	Female	palaeo	Yes	mass.mail
23	Technological Change	23. How might nanotechnology have positive or negative impacts on biodiversity conservation?	no	no	7	postdoc	Female	palaeo	Yes	mass.mail
24	Technological Change	24. How do the type, location, and associated mitigation measures of renewable energy technologies affect biodiversity?	no	no	7	postdoc	Female	palaeo	Yes	mass.mail
25	Technological Change	25. What are the direct and indirect impacts of genetically modified organisms on biodiversity?	no	no	7	postdoc	Female	palaeo	Yes	mass.mail
26	Technological Change	26. What are the implications for land use and biodiversity of the new and emerging “bioeconomy” markets (crops for pharmaceuticals, plastics, adhesives, etc.)?	no	no	7	postdoc	Female	palaeo	Yes	mass.mail
27	Protected Areas	27. How effective are different types of protected areas (e.g., strict nature reserves, hunting reserves, and national parks) at conserving biodiversity and providing ecosystem services?	yes	yes	7	postdoc	Female	palaeo	Yes	mass.mail
28	Protected Areas	28. What is the management cost per hectare required to manage protected areas effectively, and how does this vary with management category, geography, and threat?	no	no	7	postdoc	Female	palaeo	Yes	mass.mail
29	Protected Areas	29. What are the human well-being costs and benefits of protected areas, how are these distributed, and how do they vary with governance, resource tenure arrangements, and site characteristics?	no	no	7	postdoc	Female	palaeo	Yes	mass.mail
30	Protected Areas	30. How does the management of protected areas affect conservation beyond the boundaries of the protected area, such as through the displacement of human populations, hunting, or fishing?	no	no	7	postdoc	Female	palaeo	Yes	mass.mail
31	Ecosystem Management and Restoration	31. What is the trade-off for biodiversity between balancing production of natural resources from intensive management systems, such as plantation forestry and aquaculture, versus harvesting those resources from more natural ecosystems?	no	no	7	postdoc	Female	palaeo	Yes	mass.mail
32	Ecosystem Management and Restoration	32. What was the condition of ecosystems before significant human disruption, and how can this knowledge be used to improve current and future management?	yes	yes	7	postdoc	Female	palaeo	Yes	mass.mail
33	Ecosystem Management and Restoration	33. What, and where, are the significant opportunities for large-scale ecosystem restoration that benefits biodiversity and human well-being?	yes	yes	7	postdoc	Female	palaeo	Yes	mass.mail
34	Ecosystem Management and Restoration	34. How can ecosystem management systems be designed to better emulate natural processes, notably natural disturbance regimes, and to what extent does this improve conservation effectiveness?	yes	yes	7	postdoc	Female	palaeo	Yes	mass.mail
35	Ecosystem Management and Restoration	35. To what extent, and under what conditions, does the integration of marine, terrestrial, and freshwater ecosystems within conservation plans yield better outcomes than plans based on single realms?	no	no	7	postdoc	Female	palaeo	Yes	mass.mail
36	Ecosystem Management and Restoration	36. What spatial pattern of human settlement (e.g., clustered vs. dispersed) has the least impact on biodiversity?	yes	yes	7	postdoc	Female	palaeo	Yes	mass.mail
37	Ecosystem Management and Restoration	37. What is the contribution of areas that are intensively managed for production of commodities (such as food, timber, or biofuels) to conservation of biodiversity at the landscape scale?	no	no	7	postdoc	Female	palaeo	Yes	mass.mail
38	Ecosystem Management and Restoration	38. How can an understanding of factors affecting household decisions to invest in different naturalresource- based productive activities (e.g., agriculture, fishing, or hunting) be used to predict the biodiversity impacts of household responses to environmental change?	no	no	7	postdoc	Female	palaeo	Yes	mass.mail
39	Terrestrial Ecosystems	39. What are the impacts on biodiversity and ecosystem services of biofuel production and how will these vary by feedstock type, location, objective, and technology applied?	no	no	7	postdoc	Female	palaeo	Yes	mass.mail
40	Terrestrial Ecosystems	40. Under what conditions can agricultural intensification contribute to conserving overall biodiversity by reducing pressure to convert natural ecosystems?	no	no	7	postdoc	Female	palaeo	Yes	mass.mail
41	Terrestrial Ecosystems	41. What are the impacts (on and off site) on agricultural returns and biodiversity of “biodiversity-friendly” agricultural practices, such as organic, minimum tillage, and agroenvironment schemes?	no	no	7	postdoc	Female	palaeo	Yes	mass.mail
42	Terrestrial Ecosystems	42. Under what circumstances can afforestation, reforestation, and reduced emissions from deforestation and degradation (REDD) benefit biodiversity conservation, reduce emissions, and provide sustainable livelihoods?	yes	yes	7	postdoc	Female	palaeo	Yes	mass.mail
43	Terrestrial Ecosystems	43. How do different forms of forest governance influence biodiversity conservation outcomes and the implementation of REDD?	no	no	7	postdoc	Female	palaeo	Yes	mass.mail
44	Terrestrial Ecosystems	44. How are arid and semiarid ecosystems affected by the interaction of multiple stressors such as grazing by domestic livestock, soil erosion, and drought?	yes	yes	7	postdoc	Female	palaeo	Yes	mass.mail
45	Terrestrial Ecosystems	45. What are the contributions of urban nature reserves and other green amenity spaces, such as golf courses, to biodiversity conservation, and how can these be enhanced?	no	no	7	postdoc	Female	palaeo	Yes	mass.mail
46	Marine Ecosystems	46. How will ocean acidification affect marine biodiversity and ecosystem function, and what measures could mitigate these effects?	yes	yes	7	postdoc	Female	palaeo	Yes	mass.mail
47	Marine Ecosystems	47. What are the ecological, social, and economic impacts resulting from the expansion of freshwater and marine aquaculture?	yes	yes	7	postdoc	Female	palaeo	Yes	mass.mail
48	Marine Ecosystems	48. Which management actions are most effective for ensuring the long-term survival of coral reefs in response to the combined impacts of climate change and other existing stressors?	yes	yes	7	postdoc	Female	palaeo	Yes	mass.mail
49	Marine Ecosystems	49. Which management approaches to fisheries are most effective at mitigating the impacts of fish extraction and fishing gear on nontarget species and their habitats?	no	yes	7	postdoc	Female	palaeo	Yes	mass.mail
50	Marine Ecosystems	50. How does the effectiveness of marine protected areas vary with biological, physical, and social factors and with connectivity to other protected areas?	yes	yes	7	postdoc	Female	palaeo	Yes	mass.mail
51	Marine Ecosystems	51. What will be the impacts of climate change on phytoplankton and oceanic productivity, and what will be the feedbacks of these impacts on the climate?	yes	yes	7	postdoc	Female	palaeo	Yes	mass.mail
52	Marine Ecosystems	52. How will multiple stressors, especially fishing, pollution, sea temperature fluctuations, acidification, and diseases, interact to affect marine ecosystems?	yes	yes	7	postdoc	Female	palaeo	Yes	mass.mail
53	Marine Ecosystems	53. Which mechanisms are most effective at conserving biodiversity in ocean areas occurring outside the legal jurisdiction of any single country?	no	no	7	postdoc	Female	palaeo	Yes	mass.mail
54	Freshwater Ecosystems	54. How can freshwater biodiversity and ecosystem service values best be incorporated in the design of water-provisioning schemes for direct human use and food production?	yes	yes	7	postdoc	Female	palaeo	Yes	mass.mail
55	Freshwater Ecosystems	55. Which aquatic species and communities are most vulnerable to human impacts, and how would their degradation affect the provision of ecosystem services?	yes	yes	7	postdoc	Female	palaeo	Yes	mass.mail
56	Freshwater Ecosystems	56. Where will the impacts of global climate change on hydrology be most extreme, and how might they affect freshwater species and the ability of wetlands and inland waters to deliver ecosystem services?	yes	yes	7	postdoc	Female	palaeo	Yes	mass.mail
57	Freshwater Ecosystems	57. Which multinational governance, cross-sector cooperation arrangements, and finance mechanisms will make freshwater ecosystem management more effective and reduce international conflicts over water?	no	no	7	postdoc	Female	palaeo	Yes	mass.mail
58	Freshwater Ecosystems	58. How does investment in restoration of wetlands and riparian areas compare with construction of dams and flood defenses in providing cost-effective improvements in flood management and the storage and retention of water for domestic, industrial, and agricultural use?	yes	yes	7	postdoc	Female	palaeo	Yes	mass.mail
59	Species Management	59. Under what conditions is trade in captive or wildharvested species beneficial for wild populations of the traded species?	no	yes	7	postdoc	Female	palaeo	Yes	mass.mail
60	Species Management	60. What information is required to enable responsible authorities to decide when and how to manage nonnative species?	yes	yes	7	postdoc	Female	palaeo	Yes	mass.mail
61	Species Management	61. What is the relative effectiveness of different methods for facilitating movement of a species among disjunct patches of its habitat?	yes	yes	7	postdoc	Female	palaeo	Yes	mass.mail
62	Species Management	62. What is the cost-effectiveness of different contributions to species conservation programs such as education, captive breeding, and habitat management?	no	no	7	postdoc	Female	palaeo	Yes	mass.mail
63	Species Management	63. What are the ecosystem impacts of efforts to conserve charismatic, flagship, or umbrella species?	yes	yes	7	postdoc	Female	palaeo	Yes	mass.mail
64	Species Management	64. What are the likely risks, costs, and benefits of reintroducing and translocating species as a response to climate change?	yes	yes	7	postdoc	Female	palaeo	Yes	mass.mail
65	Species Management	65. What are the most effective approaches for reversing range and population collapse in top predators, large herbivores, and other species that exert disproportionate effects on ecosystem structure and function?	yes	yes	7	postdoc	Female	palaeo	Yes	mass.mail
66	Species Management	66. How can we best manage diseases that have the potential to move among wild species, domestic species, and people?	no	no	7	postdoc	Female	palaeo	Yes	mass.mail
67	Organizational Systems and Processes	67. How do the characteristics of the organizations (e.g., government vs. nongovernment) and their funding (e.g., amount and duration of funds) shape the effectiveness of conservation interventions?	no	no	7	postdoc	Female	palaeo	Yes	mass.mail
68	Organizational Systems and Processes	68. What factors affect the extent to which practitioners integrate consideration of human needs and preferences into policy and practice?	no	no	7	postdoc	Female	palaeo	Yes	mass.mail
69	Organizational Systems and Processes	69. What is the cost-effectiveness of different approaches for rapidly expanding professional conservation capacity, and how does this vary with circumstances and among countries?	no	no	7	postdoc	Female	palaeo	Yes	mass.mail
70	Organizational Systems and Processes	70. What is the effectiveness of the different mechanisms used to foster the evaluation and dissemination of conservation interventions?	no	no	7	postdoc	Female	palaeo	Yes	mass.mail
71	Organizational Systems and Processes	71. How effective are the different strategies devised to integrate scientific knowledge into conservation policy and practice?	no	no	7	postdoc	Female	palaeo	Yes	mass.mail
72	Organizational Systems and Processes	72. How effective are the different mechanisms used to promote data sharing and collaboration among individuals, conservationists, and conservation organizations?	yes	yes	7	postdoc	Female	palaeo	Yes	mass.mail
73	Societal Context and Change	73. What are the impacts on biodiversity of shifting patterns and trends in human demography, economic activity, consumption, and technology?	no	no	7	postdoc	Female	palaeo	Yes	mass.mail
74	Societal Context and Change	74. How does the relationship between economic growth and biodiversity vary across scales, among different types of ecosystems, and with the type of economic activity?	no	no	7	postdoc	Female	palaeo	Yes	mass.mail
75	Societal Context and Change	75. What are the direct and indirect impacts of armed conflict on biodiversity?	no	no	7	postdoc	Female	palaeo	Yes	mass.mail
76	Societal Context and Change	76. What are the biodiversity impacts of changes in energy prices?	no	no	7	postdoc	Female	palaeo	Yes	mass.mail
77	Societal Context and Change	77. How do resource tenure systems shape conservation outcomes in different social and ecological contexts?	no	no	7	postdoc	Female	palaeo	Yes	mass.mail
78	Societal Context and Change	78. What are the impacts of international trade agreements and related policy instruments on biodiversity?	no	no	7	postdoc	Female	palaeo	Yes	mass.mail
79	Societal Context and Change	79. How do economic subsidies affect biodiversity within the recipient country and elsewhere?	no	no	7	postdoc	Female	palaeo	Yes	mass.mail
80	Societal Context and Change	80. How does corruption influence the effectiveness of conservation, and what are the most effective ways of preventing negative consequences?	no	no	7	postdoc	Female	palaeo	Yes	mass.mail
81	Societal Context and Change	81. What are the conservation impacts of improved access to education, employment, and reproductive choice?	no	no	7	postdoc	Female	palaeo	Yes	mass.mail
82	Societal Context and Change	82. What is the relationship between individuals learning about environmental problems and their conservation attitudes, knowledge, beliefs, and behaviors?	no	no	7	postdoc	Female	palaeo	Yes	mass.mail
83	Societal Context and Change	83. What are the impacts of increasing human dissociation from nature on the conservation of biodiversity?	no	no	7	postdoc	Female	palaeo	Yes	mass.mail
84	Societal Context and Change	84. What are the effects of changes in human patterns of food consumption on biodiversity (e.g., shift from bushmeat to domestic meat and from fish to plantbased protein), and how are such human patterns of food consumption shaped by education programs, financial incentives, and other policy instruments?	no	no	7	postdoc	Female	palaeo	Yes	mass.mail
85	Societal Context and Change	85. What factors shape human (in)tolerance of the presence and activities ofwild animals, especially where those animals induce human–wildlife conflict?	no	no	7	postdoc	Female	palaeo	Yes	mass.mail
86	Impacts of Conservation Interventions	86. What have been the impacts on biodiversity of the Convention on Biological Diversity 2010 targets, and what objectives, mechanism, time frame, and means of measurement would be most effective for future targets?	no	no	7	postdoc	Female	palaeo	Yes	mass.mail
87	Impacts of Conservation Interventions	87. How do different values (e.g., use vs. preservation) and the framing of these values (e.g., ecosystem services vs. species) motivate policy makers to assign public resources to conservation programs and policies?	no	no	7	postdoc	Female	palaeo	Yes	mass.mail
88	Impacts of Conservation Interventions	88. What factors shape individual and state compliance with local, national, and international conservation regimes?	no	no	7	postdoc	Female	palaeo	Yes	mass.mail
89	Impacts of Conservation Interventions	89. What are the consequences of investment in improving knowledge (e.g., status, nature of threat, and effectiveness of interventions) versus expenditure on conservation action, and how does this differ among conservation issues?	no	no	7	postdoc	Female	palaeo	Yes	mass.mail
90	Impacts of Conservation Interventions	90. What are the impacts on biodiversity and human well-being of differing approaches to devolving the responsibility for natural resource management?	no	no	7	postdoc	Female	palaeo	Yes	mass.mail
91	Impacts of Conservation Interventions	91. What are the impacts of different conservation incentive programs on biodiversity and human wellbeing?	no	no	7	postdoc	Female	palaeo	Yes	mass.mail
92	Impacts of Conservation Interventions	92. How does public involvement, especially of marginalized groups, in conservation decision making shape the effectiveness of conservation interventions?	no	no	7	postdoc	Female	palaeo	Yes	mass.mail
93	Impacts of Conservation Interventions	93. What are the impacts of free, prior, and informed consent policies on the emergence, evolution, and performance of conservation interventions?	no	no	7	postdoc	Female	palaeo	Yes	mass.mail
94	Impacts of Conservation Interventions	94. How does providing information to resource users affect individual behavior and support for collective restrictions, and how does the effect vary with different means of providing the information?	no	no	7	postdoc	Female	palaeo	Yes	mass.mail
95	Impacts of Conservation Interventions	95. What are the conservation impacts of corporate social responsibility regimes that are biodiversityoriented?	no	no	7	postdoc	Female	palaeo	Yes	mass.mail
96	Impacts of Conservation Interventions	96. What are the social impacts of conservation interventions, and how and why do these impacts vary among social groups (e.g., elites, poor, women, and indigenous)?	no	no	7	postdoc	Female	palaeo	Yes	mass.mail
97	Impacts of Conservation Interventions	97. What factors shape the likelihood and extent of formal recognition of customary rights and traditional institutions as the basis for conservation policy and practices, and what are the impacts of this formal recognition on conservation outcomes?	no	no	7	postdoc	Female	palaeo	Yes	mass.mail
98	Impacts of Conservation Interventions	98. What are the most cost-effectivemeans of encouraging broad, long-lasting, and active societal support and action for conservation in different contexts and among different actors?	no	no	7	postdoc	Female	palaeo	Yes	mass.mail
99	Impacts of Conservation Interventions	99. What has been the effect of environmental impact assessments on biodiversity conservation?	no	no	7	postdoc	Female	palaeo	Yes	mass.mail
100	Impacts of Conservation Interventions	100. What mechanisms best promote the use of local ideas and knowledge in conservation programs in ways that enhance biodiversity outcomes?	no	no	7	postdoc	Female	palaeo	Yes	mass.mail
1	Ecosystem Function and Services	Do critical thresholds exist at which the loss of species diversity, or the loss of particular species, disrupts ecosystem functions and services, and how can these thresholds be predicted?	yes	yes	8	postdoc	Female	conservation	No	mass.mail
2	Ecosystem Function and Services	What is the effectiveness of different methods for the assessment of ecosystem services?	no	no	8	postdoc	Female	conservation	No	mass.mail
3	Ecosystem Function and Services	How can biodiversity considerations be integrated into economic policies to reflect the monetary and nonmonetary value of biodiversity, ecosystem processes, goods, and services?	no	no	8	postdoc	Female	conservation	No	mass.mail
4	Ecosystem Function and Services	How can ecosystems be managed to increase protection of humans and biodiversity from extreme events?	yes	yes	8	postdoc	Female	conservation	No	mass.mail
5	Ecosystem Function and Services	How, where, and when has biodiversity loss affected human welfare?	no	yes	8	postdoc	Female	conservation	No	mass.mail
6	Ecosystem Function and Services	What strategies for distributing the material benefits derived from biodiversity most effectively foster environmental stewardship and biodiversity conservation?	no	no	8	postdoc	Female	conservation	No	mass.mail
7	Ecosystem Function and Services	How can protected area networks be designed to increase carbon storage benefits and mitigate climate impacts, with these benefits as incentives to support conservation actions?	yes	yes	8	postdoc	Female	conservation	No	mass.mail
8	Ecosystem Function and Services	How does soil biodiversity contribute to the extent and persistence of ecosystem services, including agricultural productivity?	no	no	8	postdoc	Female	conservation	No	mass.mail
9	Climate Change	9. What impact will the melting of polar ice and a reduction in permafrost have on the human use of high-latitude ecosystems, and how will these changes in human use affect biodiversity?	no	yes	8	postdoc	Female	conservation	No	mass.mail
10	Climate Change	10. Which elements of biodiversity in which locations are most vulnerable to climate change, including extreme events?	yes	yes	8	postdoc	Female	conservation	No	mass.mail
11	Climate Change	11. How is the resilience of ecosystems to climate change affected by human activities and interventions?	no	yes	8	postdoc	Female	conservation	No	mass.mail
12	Climate Change	12. What factors determine the rates at which coastal ecosystems can respond to sea-level rise, and which of these are amenable to management?	yes	yes	8	postdoc	Female	conservation	No	mass.mail
13	Climate Change	13. How will climate change, together with other environmental stressors, alter the distribution and prevalence of diseases of wild species?	yes	yes	8	postdoc	Female	conservation	No	mass.mail
14	Climate Change	14. How will human responses to climate change (e.g., changes in agriculture, resource conflicts, and migration) affect biodiversity?	no	yes	8	postdoc	Female	conservation	No	mass.mail
15	Climate Change	15. How might biodiversity policies and management practices be modified and implemented to accommodate climate change?	yes	yes	8	postdoc	Female	conservation	No	mass.mail
16	Climate Change	16. How might emerging carbon markets affect biodiversity through their impacts on the protection, management, and creation of habitats?	no	no	8	postdoc	Female	conservation	No	mass.mail
17	Climate Change	17. What are the potential effects of feedbacks between climate change and ecosystem dynamics (e.g., drought, forest dieback, and coral bleaching) on the effectiveness of policy measures to sequester carbon and protect biodiversity?	no	no	8	postdoc	Female	conservation	No	mass.mail
18	Climate Change	18. How much carbon is sequestered by different ecosystems, including their soils, and how can these ecosystems be managed to contribute most effectively to the mitigation of climate change?	yes	yes	8	postdoc	Female	conservation	No	mass.mail
19	Climate Change	19. How, where, and to what extent can natural and seminatural ecosystems contribute to climate change adaptation and mitigation?	yes	yes	8	postdoc	Female	conservation	No	mass.mail
20	Climate Change	20. How will climate change affect the distribution and impacts of climate-dependent disturbance regimes, such as fire?	yes	yes	8	postdoc	Female	conservation	No	mass.mail
21	Climate Change	21. How will climate change affect global food production, and what are the resulting consequences for ecosystems and agrobiodiversity?	yes	yes	8	postdoc	Female	conservation	No	mass.mail
22	Climate Change	22. How does biodiversity shape social resilience to the effects of climate change?	no	yes	8	postdoc	Female	conservation	No	mass.mail
23	Technological Change	23. How might nanotechnology have positive or negative impacts on biodiversity conservation?	yes	yes	8	postdoc	Female	conservation	No	mass.mail
24	Technological Change	24. How do the type, location, and associated mitigation measures of renewable energy technologies affect biodiversity?	no	no	8	postdoc	Female	conservation	No	mass.mail
25	Technological Change	25. What are the direct and indirect impacts of genetically modified organisms on biodiversity?	no	no	8	postdoc	Female	conservation	No	mass.mail
26	Technological Change	26. What are the implications for land use and biodiversity of the new and emerging “bioeconomy” markets (crops for pharmaceuticals, plastics, adhesives, etc.)?	no	no	8	postdoc	Female	conservation	No	mass.mail
27	Protected Areas	27. How effective are different types of protected areas (e.g., strict nature reserves, hunting reserves, and national parks) at conserving biodiversity and providing ecosystem services?	no	no	8	postdoc	Female	conservation	No	mass.mail
28	Protected Areas	28. What is the management cost per hectare required to manage protected areas effectively, and how does this vary with management category, geography, and threat?	no	no	8	postdoc	Female	conservation	No	mass.mail
29	Protected Areas	29. What are the human well-being costs and benefits of protected areas, how are these distributed, and how do they vary with governance, resource tenure arrangements, and site characteristics?	no	no	8	postdoc	Female	conservation	No	mass.mail
30	Protected Areas	30. How does the management of protected areas affect conservation beyond the boundaries of the protected area, such as through the displacement of human populations, hunting, or fishing?	no	no	8	postdoc	Female	conservation	No	mass.mail
31	Ecosystem Management and Restoration	31. What is the trade-off for biodiversity between balancing production of natural resources from intensive management systems, such as plantation forestry and aquaculture, versus harvesting those resources from more natural ecosystems?	no	no	8	postdoc	Female	conservation	No	mass.mail
32	Ecosystem Management and Restoration	32. What was the condition of ecosystems before significant human disruption, and how can this knowledge be used to improve current and future management?	yes	yes	8	postdoc	Female	conservation	No	mass.mail
33	Ecosystem Management and Restoration	33. What, and where, are the significant opportunities for large-scale ecosystem restoration that benefits biodiversity and human well-being?	yes	yes	8	postdoc	Female	conservation	No	mass.mail
34	Ecosystem Management and Restoration	34. How can ecosystem management systems be designed to better emulate natural processes, notably natural disturbance regimes, and to what extent does this improve conservation effectiveness?	yes	yes	8	postdoc	Female	conservation	No	mass.mail
35	Ecosystem Management and Restoration	35. To what extent, and under what conditions, does the integration of marine, terrestrial, and freshwater ecosystems within conservation plans yield better outcomes than plans based on single realms?	no	no	8	postdoc	Female	conservation	No	mass.mail
36	Ecosystem Management and Restoration	36. What spatial pattern of human settlement (e.g., clustered vs. dispersed) has the least impact on biodiversity?	no	yes	8	postdoc	Female	conservation	No	mass.mail
37	Ecosystem Management and Restoration	37. What is the contribution of areas that are intensively managed for production of commodities (such as food, timber, or biofuels) to conservation of biodiversity at the landscape scale?	no	yes	8	postdoc	Female	conservation	No	mass.mail
38	Ecosystem Management and Restoration	38. How can an understanding of factors affecting household decisions to invest in different naturalresource- based productive activities (e.g., agriculture, fishing, or hunting) be used to predict the biodiversity impacts of household responses to environmental change?	no	no	8	postdoc	Female	conservation	No	mass.mail
39	Terrestrial Ecosystems	39. What are the impacts on biodiversity and ecosystem services of biofuel production and how will these vary by feedstock type, location, objective, and technology applied?	no	no	8	postdoc	Female	conservation	No	mass.mail
40	Terrestrial Ecosystems	40. Under what conditions can agricultural intensification contribute to conserving overall biodiversity by reducing pressure to convert natural ecosystems?	no	no	8	postdoc	Female	conservation	No	mass.mail
41	Terrestrial Ecosystems	41. What are the impacts (on and off site) on agricultural returns and biodiversity of “biodiversity-friendly” agricultural practices, such as organic, minimum tillage, and agroenvironment schemes?	no	no	8	postdoc	Female	conservation	No	mass.mail
42	Terrestrial Ecosystems	42. Under what circumstances can afforestation, reforestation, and reduced emissions from deforestation and degradation (REDD) benefit biodiversity conservation, reduce emissions, and provide sustainable livelihoods?	no	no	8	postdoc	Female	conservation	No	mass.mail
43	Terrestrial Ecosystems	43. How do different forms of forest governance influence biodiversity conservation outcomes and the implementation of REDD?	no	no	8	postdoc	Female	conservation	No	mass.mail
44	Terrestrial Ecosystems	44. How are arid and semiarid ecosystems affected by the interaction of multiple stressors such as grazing by domestic livestock, soil erosion, and drought?	no	yes	8	postdoc	Female	conservation	No	mass.mail
45	Terrestrial Ecosystems	45. What are the contributions of urban nature reserves and other green amenity spaces, such as golf courses, to biodiversity conservation, and how can these be enhanced?	no	no	8	postdoc	Female	conservation	No	mass.mail
46	Marine Ecosystems	46. How will ocean acidification affect marine biodiversity and ecosystem function, and what measures could mitigate these effects?	yes	yes	8	postdoc	Female	conservation	No	mass.mail
47	Marine Ecosystems	47. What are the ecological, social, and economic impacts resulting from the expansion of freshwater and marine aquaculture?	no	no	8	postdoc	Female	conservation	No	mass.mail
48	Marine Ecosystems	48. Which management actions are most effective for ensuring the long-term survival of coral reefs in response to the combined impacts of climate change and other existing stressors?	yes	yes	8	postdoc	Female	conservation	No	mass.mail
49	Marine Ecosystems	49. Which management approaches to fisheries are most effective at mitigating the impacts of fish extraction and fishing gear on nontarget species and their habitats?	no	no	8	postdoc	Female	conservation	No	mass.mail
50	Marine Ecosystems	50. How does the effectiveness of marine protected areas vary with biological, physical, and social factors and with connectivity to other protected areas?	no	no	8	postdoc	Female	conservation	No	mass.mail
51	Marine Ecosystems	51. What will be the impacts of climate change on phytoplankton and oceanic productivity, and what will be the feedbacks of these impacts on the climate?	yes	yes	8	postdoc	Female	conservation	No	mass.mail
52	Marine Ecosystems	52. How will multiple stressors, especially fishing, pollution, sea temperature fluctuations, acidification, and diseases, interact to affect marine ecosystems?	yes	yes	8	postdoc	Female	conservation	No	mass.mail
53	Marine Ecosystems	53. Which mechanisms are most effective at conserving biodiversity in ocean areas occurring outside the legal jurisdiction of any single country?	no	no	8	postdoc	Female	conservation	No	mass.mail
54	Freshwater Ecosystems	54. How can freshwater biodiversity and ecosystem service values best be incorporated in the design of water-provisioning schemes for direct human use and food production?	no	no	8	postdoc	Female	conservation	No	mass.mail
55	Freshwater Ecosystems	55. Which aquatic species and communities are most vulnerable to human impacts, and how would their degradation affect the provision of ecosystem services?	yes	yes	8	postdoc	Female	conservation	No	mass.mail
56	Freshwater Ecosystems	56. Where will the impacts of global climate change on hydrology be most extreme, and how might they affect freshwater species and the ability of wetlands and inland waters to deliver ecosystem services?	yes	yes	8	postdoc	Female	conservation	No	mass.mail
57	Freshwater Ecosystems	57. Which multinational governance, cross-sector cooperation arrangements, and finance mechanisms will make freshwater ecosystem management more effective and reduce international conflicts over water?	no	no	8	postdoc	Female	conservation	No	mass.mail
58	Freshwater Ecosystems	58. How does investment in restoration of wetlands and riparian areas compare with construction of dams and flood defenses in providing cost-effective improvements in flood management and the storage and retention of water for domestic, industrial, and agricultural use?	no	no	8	postdoc	Female	conservation	No	mass.mail
59	Species Management	59. Under what conditions is trade in captive or wildharvested species beneficial for wild populations of the traded species?	no	no	8	postdoc	Female	conservation	No	mass.mail
60	Species Management	60. What information is required to enable responsible authorities to decide when and how to manage nonnative species?	no	no	8	postdoc	Female	conservation	No	mass.mail
61	Species Management	61. What is the relative effectiveness of different methods for facilitating movement of a species among disjunct patches of its habitat?	no	no	8	postdoc	Female	conservation	No	mass.mail
62	Species Management	62. What is the cost-effectiveness of different contributions to species conservation programs such as education, captive breeding, and habitat management?	no	no	8	postdoc	Female	conservation	No	mass.mail
63	Species Management	63. What are the ecosystem impacts of efforts to conserve charismatic, flagship, or umbrella species?	no	no	8	postdoc	Female	conservation	No	mass.mail
64	Species Management	64. What are the likely risks, costs, and benefits of reintroducing and translocating species as a response to climate change?	no	no	8	postdoc	Female	conservation	No	mass.mail
65	Species Management	65. What are the most effective approaches for reversing range and population collapse in top predators, large herbivores, and other species that exert disproportionate effects on ecosystem structure and function?	no	no	8	postdoc	Female	conservation	No	mass.mail
66	Species Management	66. How can we best manage diseases that have the potential to move among wild species, domestic species, and people?	no	no	8	postdoc	Female	conservation	No	mass.mail
67	Organizational Systems and Processes	67. How do the characteristics of the organizations (e.g., government vs. nongovernment) and their funding (e.g., amount and duration of funds) shape the effectiveness of conservation interventions?	no	no	8	postdoc	Female	conservation	No	mass.mail
68	Organizational Systems and Processes	68. What factors affect the extent to which practitioners integrate consideration of human needs and preferences into policy and practice?	no	no	8	postdoc	Female	conservation	No	mass.mail
69	Organizational Systems and Processes	69. What is the cost-effectiveness of different approaches for rapidly expanding professional conservation capacity, and how does this vary with circumstances and among countries?	no	no	8	postdoc	Female	conservation	No	mass.mail
70	Organizational Systems and Processes	70. What is the effectiveness of the different mechanisms used to foster the evaluation and dissemination of conservation interventions?	no	no	8	postdoc	Female	conservation	No	mass.mail
71	Organizational Systems and Processes	71. How effective are the different strategies devised to integrate scientific knowledge into conservation policy and practice?	no	no	8	postdoc	Female	conservation	No	mass.mail
72	Organizational Systems and Processes	72. How effective are the different mechanisms used to promote data sharing and collaboration among individuals, conservationists, and conservation organizations?	no	no	8	postdoc	Female	conservation	No	mass.mail
73	Societal Context and Change	73. What are the impacts on biodiversity of shifting patterns and trends in human demography, economic activity, consumption, and technology?	no	yes	8	postdoc	Female	conservation	No	mass.mail
74	Societal Context and Change	74. How does the relationship between economic growth and biodiversity vary across scales, among different types of ecosystems, and with the type of economic activity?	no	no	8	postdoc	Female	conservation	No	mass.mail
75	Societal Context and Change	75. What are the direct and indirect impacts of armed conflict on biodiversity?	no	no	8	postdoc	Female	conservation	No	mass.mail
76	Societal Context and Change	76. What are the biodiversity impacts of changes in energy prices?	no	no	8	postdoc	Female	conservation	No	mass.mail
77	Societal Context and Change	77. How do resource tenure systems shape conservation outcomes in different social and ecological contexts?	no	no	8	postdoc	Female	conservation	No	mass.mail
78	Societal Context and Change	78. What are the impacts of international trade agreements and related policy instruments on biodiversity?	no	no	8	postdoc	Female	conservation	No	mass.mail
79	Societal Context and Change	79. How do economic subsidies affect biodiversity within the recipient country and elsewhere?	no	no	8	postdoc	Female	conservation	No	mass.mail
80	Societal Context and Change	80. How does corruption influence the effectiveness of conservation, and what are the most effective ways of preventing negative consequences?	no	no	8	postdoc	Female	conservation	No	mass.mail
81	Societal Context and Change	81. What are the conservation impacts of improved access to education, employment, and reproductive choice?	no	no	8	postdoc	Female	conservation	No	mass.mail
82	Societal Context and Change	82. What is the relationship between individuals learning about environmental problems and their conservation attitudes, knowledge, beliefs, and behaviors?	no	no	8	postdoc	Female	conservation	No	mass.mail
83	Societal Context and Change	83. What are the impacts of increasing human dissociation from nature on the conservation of biodiversity?	no	no	8	postdoc	Female	conservation	No	mass.mail
84	Societal Context and Change	84. What are the effects of changes in human patterns of food consumption on biodiversity (e.g., shift from bushmeat to domestic meat and from fish to plantbased protein), and how are such human patterns of food consumption shaped by education programs, financial incentives, and other policy instruments?	no	yes	8	postdoc	Female	conservation	No	mass.mail
85	Societal Context and Change	85. What factors shape human (in)tolerance of the presence and activities ofwild animals, especially where those animals induce human–wildlife conflict?	no	yes	8	postdoc	Female	conservation	No	mass.mail
86	Impacts of Conservation Interventions	86. What have been the impacts on biodiversity of the Convention on Biological Diversity 2010 targets, and what objectives, mechanism, time frame, and means of measurement would be most effective for future targets?	no	no	8	postdoc	Female	conservation	No	mass.mail
87	Impacts of Conservation Interventions	87. How do different values (e.g., use vs. preservation) and the framing of these values (e.g., ecosystem services vs. species) motivate policy makers to assign public resources to conservation programs and policies?	no	no	8	postdoc	Female	conservation	No	mass.mail
88	Impacts of Conservation Interventions	88. What factors shape individual and state compliance with local, national, and international conservation regimes?	no	no	8	postdoc	Female	conservation	No	mass.mail
89	Impacts of Conservation Interventions	89. What are the consequences of investment in improving knowledge (e.g., status, nature of threat, and effectiveness of interventions) versus expenditure on conservation action, and how does this differ among conservation issues?	no	no	8	postdoc	Female	conservation	No	mass.mail
90	Impacts of Conservation Interventions	90. What are the impacts on biodiversity and human well-being of differing approaches to devolving the responsibility for natural resource management?	no	no	8	postdoc	Female	conservation	No	mass.mail
91	Impacts of Conservation Interventions	91. What are the impacts of different conservation incentive programs on biodiversity and human wellbeing?	no	no	8	postdoc	Female	conservation	No	mass.mail
92	Impacts of Conservation Interventions	92. How does public involvement, especially of marginalized groups, in conservation decision making shape the effectiveness of conservation interventions?	no	no	8	postdoc	Female	conservation	No	mass.mail
93	Impacts of Conservation Interventions	93. What are the impacts of free, prior, and informed consent policies on the emergence, evolution, and performance of conservation interventions?	no	no	8	postdoc	Female	conservation	No	mass.mail
94	Impacts of Conservation Interventions	94. How does providing information to resource users affect individual behavior and support for collective restrictions, and how does the effect vary with different means of providing the information?	no	no	8	postdoc	Female	conservation	No	mass.mail
95	Impacts of Conservation Interventions	95. What are the conservation impacts of corporate social responsibility regimes that are biodiversityoriented?	no	no	8	postdoc	Female	conservation	No	mass.mail
96	Impacts of Conservation Interventions	96. What are the social impacts of conservation interventions, and how and why do these impacts vary among social groups (e.g., elites, poor, women, and indigenous)?	no	no	8	postdoc	Female	conservation	No	mass.mail
97	Impacts of Conservation Interventions	97. What factors shape the likelihood and extent of formal recognition of customary rights and traditional institutions as the basis for conservation policy and practices, and what are the impacts of this formal recognition on conservation outcomes?	no	no	8	postdoc	Female	conservation	No	mass.mail
98	Impacts of Conservation Interventions	98. What are the most cost-effectivemeans of encouraging broad, long-lasting, and active societal support and action for conservation in different contexts and among different actors?	no	no	8	postdoc	Female	conservation	No	mass.mail
99	Impacts of Conservation Interventions	99. What has been the effect of environmental impact assessments on biodiversity conservation?	no	no	8	postdoc	Female	conservation	No	mass.mail
100	Impacts of Conservation Interventions	100. What mechanisms best promote the use of local ideas and knowledge in conservation programs in ways that enhance biodiversity outcomes?	no	no	8	postdoc	Female	conservation	No	mass.mail
1	Ecosystem Function and Services	Do critical thresholds exist at which the loss of species diversity, or the loss of particular species, disrupts ecosystem functions and services, and how can these thresholds be predicted?	yes	yes	9	student	Female	palaeo	Yes	mass.mail
2	Ecosystem Function and Services	What is the effectiveness of different methods for the assessment of ecosystem services?	yes	yes	9	student	Female	palaeo	Yes	mass.mail
3	Ecosystem Function and Services	How can biodiversity considerations be integrated into economic policies to reflect the monetary and nonmonetary value of biodiversity, ecosystem processes, goods, and services?	no	yes	9	student	Female	palaeo	Yes	mass.mail
4	Ecosystem Function and Services	How can ecosystems be managed to increase protection of humans and biodiversity from extreme events?	no	yes	9	student	Female	palaeo	Yes	mass.mail
5	Ecosystem Function and Services	How, where, and when has biodiversity loss affected human welfare?	no	yes	9	student	Female	palaeo	Yes	mass.mail
6	Ecosystem Function and Services	What strategies for distributing the material benefits derived from biodiversity most effectively foster environmental stewardship and biodiversity conservation?	no	yes	9	student	Female	palaeo	Yes	mass.mail
7	Ecosystem Function and Services	How can protected area networks be designed to increase carbon storage benefits and mitigate climate impacts, with these benefits as incentives to support conservation actions?	no	yes	9	student	Female	palaeo	Yes	mass.mail
8	Ecosystem Function and Services	How does soil biodiversity contribute to the extent and persistence of ecosystem services, including agricultural productivity?	no	yes	9	student	Female	palaeo	Yes	mass.mail
9	Climate Change	9. What impact will the melting of polar ice and a reduction in permafrost have on the human use of high-latitude ecosystems, and how will these changes in human use affect biodiversity?	yes	yes	9	student	Female	palaeo	Yes	mass.mail
10	Climate Change	10. Which elements of biodiversity in which locations are most vulnerable to climate change, including extreme events?	yes	yes	9	student	Female	palaeo	Yes	mass.mail
11	Climate Change	11. How is the resilience of ecosystems to climate change affected by human activities and interventions?	no	yes	9	student	Female	palaeo	Yes	mass.mail
12	Climate Change	12. What factors determine the rates at which coastal ecosystems can respond to sea-level rise, and which of these are amenable to management?	yes	yes	9	student	Female	palaeo	Yes	mass.mail
13	Climate Change	13. How will climate change, together with other environmental stressors, alter the distribution and prevalence of diseases of wild species?	yes	yes	9	student	Female	palaeo	Yes	mass.mail
14	Climate Change	14. How will human responses to climate change (e.g., changes in agriculture, resource conflicts, and migration) affect biodiversity?	no	yes	9	student	Female	palaeo	Yes	mass.mail
15	Climate Change	15. How might biodiversity policies and management practices be modified and implemented to accommodate climate change?	no	yes	9	student	Female	palaeo	Yes	mass.mail
16	Climate Change	16. How might emerging carbon markets affect biodiversity through their impacts on the protection, management, and creation of habitats?	no	yes	9	student	Female	palaeo	Yes	mass.mail
17	Climate Change	17. What are the potential effects of feedbacks between climate change and ecosystem dynamics (e.g., drought, forest dieback, and coral bleaching) on the effectiveness of policy measures to sequester carbon and protect biodiversity?	yes	yes	9	student	Female	palaeo	Yes	mass.mail
18	Climate Change	18. How much carbon is sequestered by different ecosystems, including their soils, and how can these ecosystems be managed to contribute most effectively to the mitigation of climate change?	no	yes	9	student	Female	palaeo	Yes	mass.mail
19	Climate Change	19. How, where, and to what extent can natural and seminatural ecosystems contribute to climate change adaptation and mitigation?	no	yes	9	student	Female	palaeo	Yes	mass.mail
20	Climate Change	20. How will climate change affect the distribution and impacts of climate-dependent disturbance regimes, such as fire?	yes	yes	9	student	Female	palaeo	Yes	mass.mail
21	Climate Change	21. How will climate change affect global food production, and what are the resulting consequences for ecosystems and agrobiodiversity?	no	yes	9	student	Female	palaeo	Yes	mass.mail
22	Climate Change	22. How does biodiversity shape social resilience to the effects of climate change?	no	yes	9	student	Female	palaeo	Yes	mass.mail
23	Technological Change	23. How might nanotechnology have positive or negative impacts on biodiversity conservation?	no	no	9	student	Female	palaeo	Yes	mass.mail
24	Technological Change	24. How do the type, location, and associated mitigation measures of renewable energy technologies affect biodiversity?	no	no	9	student	Female	palaeo	Yes	mass.mail
25	Technological Change	25. What are the direct and indirect impacts of genetically modified organisms on biodiversity?	no	yes	9	student	Female	palaeo	Yes	mass.mail
26	Technological Change	26. What are the implications for land use and biodiversity of the new and emerging “bioeconomy” markets (crops for pharmaceuticals, plastics, adhesives, etc.)?	no	no	9	student	Female	palaeo	Yes	mass.mail
27	Protected Areas	27. How effective are different types of protected areas (e.g., strict nature reserves, hunting reserves, and national parks) at conserving biodiversity and providing ecosystem services?	no	yes	9	student	Female	palaeo	Yes	mass.mail
28	Protected Areas	28. What is the management cost per hectare required to manage protected areas effectively, and how does this vary with management category, geography, and threat?	no	yes	9	student	Female	palaeo	Yes	mass.mail
29	Protected Areas	29. What are the human well-being costs and benefits of protected areas, how are these distributed, and how do they vary with governance, resource tenure arrangements, and site characteristics?	no	yes	9	student	Female	palaeo	Yes	mass.mail
30	Protected Areas	30. How does the management of protected areas affect conservation beyond the boundaries of the protected area, such as through the displacement of human populations, hunting, or fishing?	no	yes	9	student	Female	palaeo	Yes	mass.mail
31	Ecosystem Management and Restoration	31. What is the trade-off for biodiversity between balancing production of natural resources from intensive management systems, such as plantation forestry and aquaculture, versus harvesting those resources from more natural ecosystems?	no	yes	9	student	Female	palaeo	Yes	mass.mail
32	Ecosystem Management and Restoration	32. What was the condition of ecosystems before significant human disruption, and how can this knowledge be used to improve current and future management?	yes	yes	9	student	Female	palaeo	Yes	mass.mail
33	Ecosystem Management and Restoration	33. What, and where, are the significant opportunities for large-scale ecosystem restoration that benefits biodiversity and human well-being?	yes	yes	9	student	Female	palaeo	Yes	mass.mail
34	Ecosystem Management and Restoration	34. How can ecosystem management systems be designed to better emulate natural processes, notably natural disturbance regimes, and to what extent does this improve conservation effectiveness?	yes	yes	9	student	Female	palaeo	Yes	mass.mail
35	Ecosystem Management and Restoration	35. To what extent, and under what conditions, does the integration of marine, terrestrial, and freshwater ecosystems within conservation plans yield better outcomes than plans based on single realms?	yes	yes	9	student	Female	palaeo	Yes	mass.mail
36	Ecosystem Management and Restoration	36. What spatial pattern of human settlement (e.g., clustered vs. dispersed) has the least impact on biodiversity?	no	yes	9	student	Female	palaeo	Yes	mass.mail
37	Ecosystem Management and Restoration	37. What is the contribution of areas that are intensively managed for production of commodities (such as food, timber, or biofuels) to conservation of biodiversity at the landscape scale?	no	yes	9	student	Female	palaeo	Yes	mass.mail
38	Ecosystem Management and Restoration	38. How can an understanding of factors affecting household decisions to invest in different naturalresource- based productive activities (e.g., agriculture, fishing, or hunting) be used to predict the biodiversity impacts of household responses to environmental change?	no	no	9	student	Female	palaeo	Yes	mass.mail
39	Terrestrial Ecosystems	39. What are the impacts on biodiversity and ecosystem services of biofuel production and how will these vary by feedstock type, location, objective, and technology applied?	no	no	9	student	Female	palaeo	Yes	mass.mail
40	Terrestrial Ecosystems	40. Under what conditions can agricultural intensification contribute to conserving overall biodiversity by reducing pressure to convert natural ecosystems?	no	yes	9	student	Female	palaeo	Yes	mass.mail
41	Terrestrial Ecosystems	41. What are the impacts (on and off site) on agricultural returns and biodiversity of “biodiversity-friendly” agricultural practices, such as organic, minimum tillage, and agroenvironment schemes?	no	yes	9	student	Female	palaeo	Yes	mass.mail
42	Terrestrial Ecosystems	42. Under what circumstances can afforestation, reforestation, and reduced emissions from deforestation and degradation (REDD) benefit biodiversity conservation, reduce emissions, and provide sustainable livelihoods?	no	yes	9	student	Female	palaeo	Yes	mass.mail
43	Terrestrial Ecosystems	43. How do different forms of forest governance influence biodiversity conservation outcomes and the implementation of REDD?	no	yes	9	student	Female	palaeo	Yes	mass.mail
44	Terrestrial Ecosystems	44. How are arid and semiarid ecosystems affected by the interaction of multiple stressors such as grazing by domestic livestock, soil erosion, and drought?	no	yes	9	student	Female	palaeo	Yes	mass.mail
45	Terrestrial Ecosystems	45. What are the contributions of urban nature reserves and other green amenity spaces, such as golf courses, to biodiversity conservation, and how can these be enhanced?	no	no	9	student	Female	palaeo	Yes	mass.mail
46	Marine Ecosystems	46. How will ocean acidification affect marine biodiversity and ecosystem function, and what measures could mitigate these effects?	yes	yes	9	student	Female	palaeo	Yes	mass.mail
47	Marine Ecosystems	47. What are the ecological, social, and economic impacts resulting from the expansion of freshwater and marine aquaculture?	no	yes	9	student	Female	palaeo	Yes	mass.mail
48	Marine Ecosystems	48. Which management actions are most effective for ensuring the long-term survival of coral reefs in response to the combined impacts of climate change and other existing stressors?	yes	yes	9	student	Female	palaeo	Yes	mass.mail
49	Marine Ecosystems	49. Which management approaches to fisheries are most effective at mitigating the impacts of fish extraction and fishing gear on nontarget species and their habitats?	no	yes	9	student	Female	palaeo	Yes	mass.mail
50	Marine Ecosystems	50. How does the effectiveness of marine protected areas vary with biological, physical, and social factors and with connectivity to other protected areas?	no	yes	9	student	Female	palaeo	Yes	mass.mail
51	Marine Ecosystems	51. What will be the impacts of climate change on phytoplankton and oceanic productivity, and what will be the feedbacks of these impacts on the climate?	yes	yes	9	student	Female	palaeo	Yes	mass.mail
52	Marine Ecosystems	52. How will multiple stressors, especially fishing, pollution, sea temperature fluctuations, acidification, and diseases, interact to affect marine ecosystems?	yes	yes	9	student	Female	palaeo	Yes	mass.mail
53	Marine Ecosystems	53. Which mechanisms are most effective at conserving biodiversity in ocean areas occurring outside the legal jurisdiction of any single country?	no	no	9	student	Female	palaeo	Yes	mass.mail
54	Freshwater Ecosystems	54. How can freshwater biodiversity and ecosystem service values best be incorporated in the design of water-provisioning schemes for direct human use and food production?	no	yes	9	student	Female	palaeo	Yes	mass.mail
55	Freshwater Ecosystems	55. Which aquatic species and communities are most vulnerable to human impacts, and how would their degradation affect the provision of ecosystem services?	yes	yes	9	student	Female	palaeo	Yes	mass.mail
56	Freshwater Ecosystems	56. Where will the impacts of global climate change on hydrology be most extreme, and how might they affect freshwater species and the ability of wetlands and inland waters to deliver ecosystem services?	yes	yes	9	student	Female	palaeo	Yes	mass.mail
57	Freshwater Ecosystems	57. Which multinational governance, cross-sector cooperation arrangements, and finance mechanisms will make freshwater ecosystem management more effective and reduce international conflicts over water?	no	no	9	student	Female	palaeo	Yes	mass.mail
58	Freshwater Ecosystems	58. How does investment in restoration of wetlands and riparian areas compare with construction of dams and flood defenses in providing cost-effective improvements in flood management and the storage and retention of water for domestic, industrial, and agricultural use?	no	yes	9	student	Female	palaeo	Yes	mass.mail
59	Species Management	59. Under what conditions is trade in captive or wildharvested species beneficial for wild populations of the traded species?	no	yes	9	student	Female	palaeo	Yes	mass.mail
60	Species Management	60. What information is required to enable responsible authorities to decide when and how to manage nonnative species?	no	yes	9	student	Female	palaeo	Yes	mass.mail
61	Species Management	61. What is the relative effectiveness of different methods for facilitating movement of a species among disjunct patches of its habitat?	yes	yes	9	student	Female	palaeo	Yes	mass.mail
62	Species Management	62. What is the cost-effectiveness of different contributions to species conservation programs such as education, captive breeding, and habitat management?	no	no	9	student	Female	palaeo	Yes	mass.mail
63	Species Management	63. What are the ecosystem impacts of efforts to conserve charismatic, flagship, or umbrella species?	no	yes	9	student	Female	palaeo	Yes	mass.mail
64	Species Management	64. What are the likely risks, costs, and benefits of reintroducing and translocating species as a response to climate change?	no	yes	9	student	Female	palaeo	Yes	mass.mail
65	Species Management	65. What are the most effective approaches for reversing range and population collapse in top predators, large herbivores, and other species that exert disproportionate effects on ecosystem structure and function?	no	yes	9	student	Female	palaeo	Yes	mass.mail
66	Species Management	66. How can we best manage diseases that have the potential to move among wild species, domestic species, and people?	no	yes	9	student	Female	palaeo	Yes	mass.mail
67	Organizational Systems and Processes	67. How do the characteristics of the organizations (e.g., government vs. nongovernment) and their funding (e.g., amount and duration of funds) shape the effectiveness of conservation interventions?	no	no	9	student	Female	palaeo	Yes	mass.mail
68	Organizational Systems and Processes	68. What factors affect the extent to which practitioners integrate consideration of human needs and preferences into policy and practice?	no	no	9	student	Female	palaeo	Yes	mass.mail
69	Organizational Systems and Processes	69. What is the cost-effectiveness of different approaches for rapidly expanding professional conservation capacity, and how does this vary with circumstances and among countries?	no	no	9	student	Female	palaeo	Yes	mass.mail
70	Organizational Systems and Processes	70. What is the effectiveness of the different mechanisms used to foster the evaluation and dissemination of conservation interventions?	no	no	9	student	Female	palaeo	Yes	mass.mail
71	Organizational Systems and Processes	71. How effective are the different strategies devised to integrate scientific knowledge into conservation policy and practice?	no	yes	9	student	Female	palaeo	Yes	mass.mail
72	Organizational Systems and Processes	72. How effective are the different mechanisms used to promote data sharing and collaboration among individuals, conservationists, and conservation organizations?	no	no	9	student	Female	palaeo	Yes	mass.mail
73	Societal Context and Change	73. What are the impacts on biodiversity of shifting patterns and trends in human demography, economic activity, consumption, and technology?	no	yes	9	student	Female	palaeo	Yes	mass.mail
74	Societal Context and Change	74. How does the relationship between economic growth and biodiversity vary across scales, among different types of ecosystems, and with the type of economic activity?	no	yes	9	student	Female	palaeo	Yes	mass.mail
75	Societal Context and Change	75. What are the direct and indirect impacts of armed conflict on biodiversity?	no	yes	9	student	Female	palaeo	Yes	mass.mail
76	Societal Context and Change	76. What are the biodiversity impacts of changes in energy prices?	no	no	9	student	Female	palaeo	Yes	mass.mail
77	Societal Context and Change	77. How do resource tenure systems shape conservation outcomes in different social and ecological contexts?	no	yes	9	student	Female	palaeo	Yes	mass.mail
78	Societal Context and Change	78. What are the impacts of international trade agreements and related policy instruments on biodiversity?	no	yes	9	student	Female	palaeo	Yes	mass.mail
79	Societal Context and Change	79. How do economic subsidies affect biodiversity within the recipient country and elsewhere?	no	no	9	student	Female	palaeo	Yes	mass.mail
80	Societal Context and Change	80. How does corruption influence the effectiveness of conservation, and what are the most effective ways of preventing negative consequences?	no	no	9	student	Female	palaeo	Yes	mass.mail
81	Societal Context and Change	81. What are the conservation impacts of improved access to education, employment, and reproductive choice?	no	no	9	student	Female	palaeo	Yes	mass.mail
82	Societal Context and Change	82. What is the relationship between individuals learning about environmental problems and their conservation attitudes, knowledge, beliefs, and behaviors?	no	no	9	student	Female	palaeo	Yes	mass.mail
83	Societal Context and Change	83. What are the impacts of increasing human dissociation from nature on the conservation of biodiversity?	no	yes	9	student	Female	palaeo	Yes	mass.mail
84	Societal Context and Change	84. What are the effects of changes in human patterns of food consumption on biodiversity (e.g., shift from bushmeat to domestic meat and from fish to plantbased protein), and how are such human patterns of food consumption shaped by education programs, financial incentives, and other policy instruments?	no	yes	9	student	Female	palaeo	Yes	mass.mail
85	Societal Context and Change	85. What factors shape human (in)tolerance of the presence and activities ofwild animals, especially where those animals induce human–wildlife conflict?	no	yes	9	student	Female	palaeo	Yes	mass.mail
86	Impacts of Conservation Interventions	86. What have been the impacts on biodiversity of the Convention on Biological Diversity 2010 targets, and what objectives, mechanism, time frame, and means of measurement would be most effective for future targets?	no	yes	9	student	Female	palaeo	Yes	mass.mail
87	Impacts of Conservation Interventions	87. How do different values (e.g., use vs. preservation) and the framing of these values (e.g., ecosystem services vs. species) motivate policy makers to assign public resources to conservation programs and policies?	no	yes	9	student	Female	palaeo	Yes	mass.mail
88	Impacts of Conservation Interventions	88. What factors shape individual and state compliance with local, national, and international conservation regimes?	no	yes	9	student	Female	palaeo	Yes	mass.mail
89	Impacts of Conservation Interventions	89. What are the consequences of investment in improving knowledge (e.g., status, nature of threat, and effectiveness of interventions) versus expenditure on conservation action, and how does this differ among conservation issues?	no	no	9	student	Female	palaeo	Yes	mass.mail
90	Impacts of Conservation Interventions	90. What are the impacts on biodiversity and human well-being of differing approaches to devolving the responsibility for natural resource management?	no	yes	9	student	Female	palaeo	Yes	mass.mail
91	Impacts of Conservation Interventions	91. What are the impacts of different conservation incentive programs on biodiversity and human wellbeing?	no	yes	9	student	Female	palaeo	Yes	mass.mail
92	Impacts of Conservation Interventions	92. How does public involvement, especially of marginalized groups, in conservation decision making shape the effectiveness of conservation interventions?	no	no	9	student	Female	palaeo	Yes	mass.mail
93	Impacts of Conservation Interventions	93. What are the impacts of free, prior, and informed consent policies on the emergence, evolution, and performance of conservation interventions?	no	no	9	student	Female	palaeo	Yes	mass.mail
94	Impacts of Conservation Interventions	94. How does providing information to resource users affect individual behavior and support for collective restrictions, and how does the effect vary with different means of providing the information?	no	yes	9	student	Female	palaeo	Yes	mass.mail
95	Impacts of Conservation Interventions	95. What are the conservation impacts of corporate social responsibility regimes that are biodiversityoriented?	no	no	9	student	Female	palaeo	Yes	mass.mail
96	Impacts of Conservation Interventions	96. What are the social impacts of conservation interventions, and how and why do these impacts vary among social groups (e.g., elites, poor, women, and indigenous)?	no	yes	9	student	Female	palaeo	Yes	mass.mail
97	Impacts of Conservation Interventions	97. What factors shape the likelihood and extent of formal recognition of customary rights and traditional institutions as the basis for conservation policy and practices, and what are the impacts of this formal recognition on conservation outcomes?	no	no	9	student	Female	palaeo	Yes	mass.mail
98	Impacts of Conservation Interventions	98. What are the most cost-effectivemeans of encouraging broad, long-lasting, and active societal support and action for conservation in different contexts and among different actors?	no	yes	9	student	Female	palaeo	Yes	mass.mail
99	Impacts of Conservation Interventions	99. What has been the effect of environmental impact assessments on biodiversity conservation?	no	no	9	student	Female	palaeo	Yes	mass.mail
100	Impacts of Conservation Interventions	100. What mechanisms best promote the use of local ideas and knowledge in conservation programs in ways that enhance biodiversity outcomes?	no	yes	9	student	Female	palaeo	Yes	mass.mail
1	Ecosystem Function and Services	Do critical thresholds exist at which the loss of species diversity, or the loss of particular species, disrupts ecosystem functions and services, and how can these thresholds be predicted?	yes	yes	10	experienced	Male	conservation	Yes	mass.mail
2	Ecosystem Function and Services	What is the effectiveness of different methods for the assessment of ecosystem services?	no	yes	10	experienced	Male	conservation	Yes	mass.mail
3	Ecosystem Function and Services	How can biodiversity considerations be integrated into economic policies to reflect the monetary and nonmonetary value of biodiversity, ecosystem processes, goods, and services?	no	no	10	experienced	Male	conservation	Yes	mass.mail
4	Ecosystem Function and Services	How can ecosystems be managed to increase protection of humans and biodiversity from extreme events?	yes	yes	10	experienced	Male	conservation	Yes	mass.mail
5	Ecosystem Function and Services	How, where, and when has biodiversity loss affected human welfare?	no	yes	10	experienced	Male	conservation	Yes	mass.mail
6	Ecosystem Function and Services	What strategies for distributing the material benefits derived from biodiversity most effectively foster environmental stewardship and biodiversity conservation?	no	no	10	experienced	Male	conservation	Yes	mass.mail
7	Ecosystem Function and Services	How can protected area networks be designed to increase carbon storage benefits and mitigate climate impacts, with these benefits as incentives to support conservation actions?	no	yes	10	experienced	Male	conservation	Yes	mass.mail
8	Ecosystem Function and Services	How does soil biodiversity contribute to the extent and persistence of ecosystem services, including agricultural productivity?	no	yes	10	experienced	Male	conservation	Yes	mass.mail
9	Climate Change	9. What impact will the melting of polar ice and a reduction in permafrost have on the human use of high-latitude ecosystems, and how will these changes in human use affect biodiversity?	yes	yes	10	experienced	Male	conservation	Yes	mass.mail
10	Climate Change	10. Which elements of biodiversity in which locations are most vulnerable to climate change, including extreme events?	yes	yes	10	experienced	Male	conservation	Yes	mass.mail
11	Climate Change	11. How is the resilience of ecosystems to climate change affected by human activities and interventions?	no	yes	10	experienced	Male	conservation	Yes	mass.mail
12	Climate Change	12. What factors determine the rates at which coastal ecosystems can respond to sea-level rise, and which of these are amenable to management?	yes	yes	10	experienced	Male	conservation	Yes	mass.mail
13	Climate Change	13. How will climate change, together with other environmental stressors, alter the distribution and prevalence of diseases of wild species?	no	yes	10	experienced	Male	conservation	Yes	mass.mail
14	Climate Change	14. How will human responses to climate change (e.g., changes in agriculture, resource conflicts, and migration) affect biodiversity?	no	yes	10	experienced	Male	conservation	Yes	mass.mail
15	Climate Change	15. How might biodiversity policies and management practices be modified and implemented to accommodate climate change?	yes	yes	10	experienced	Male	conservation	Yes	mass.mail
16	Climate Change	16. How might emerging carbon markets affect biodiversity through their impacts on the protection, management, and creation of habitats?	no	no	10	experienced	Male	conservation	Yes	mass.mail
17	Climate Change	17. What are the potential effects of feedbacks between climate change and ecosystem dynamics (e.g., drought, forest dieback, and coral bleaching) on the effectiveness of policy measures to sequester carbon and protect biodiversity?	yes	yes	10	experienced	Male	conservation	Yes	mass.mail
18	Climate Change	18. How much carbon is sequestered by different ecosystems, including their soils, and how can these ecosystems be managed to contribute most effectively to the mitigation of climate change?	no	yes	10	experienced	Male	conservation	Yes	mass.mail
19	Climate Change	19. How, where, and to what extent can natural and seminatural ecosystems contribute to climate change adaptation and mitigation?	no	yes	10	experienced	Male	conservation	Yes	mass.mail
20	Climate Change	20. How will climate change affect the distribution and impacts of climate-dependent disturbance regimes, such as fire?	no	yes	10	experienced	Male	conservation	Yes	mass.mail
21	Climate Change	21. How will climate change affect global food production, and what are the resulting consequences for ecosystems and agrobiodiversity?	no	no	10	experienced	Male	conservation	Yes	mass.mail
22	Climate Change	22. How does biodiversity shape social resilience to the effects of climate change?	no	no	10	experienced	Male	conservation	Yes	mass.mail
23	Technological Change	23. How might nanotechnology have positive or negative impacts on biodiversity conservation?	no	no	10	experienced	Male	conservation	Yes	mass.mail
24	Technological Change	24. How do the type, location, and associated mitigation measures of renewable energy technologies affect biodiversity?	no	no	10	experienced	Male	conservation	Yes	mass.mail
25	Technological Change	25. What are the direct and indirect impacts of genetically modified organisms on biodiversity?	no	no	10	experienced	Male	conservation	Yes	mass.mail
26	Technological Change	26. What are the implications for land use and biodiversity of the new and emerging “bioeconomy” markets (crops for pharmaceuticals, plastics, adhesives, etc.)?	no	no	10	experienced	Male	conservation	Yes	mass.mail
27	Protected Areas	27. How effective are different types of protected areas (e.g., strict nature reserves, hunting reserves, and national parks) at conserving biodiversity and providing ecosystem services?	no	yes	10	experienced	Male	conservation	Yes	mass.mail
28	Protected Areas	28. What is the management cost per hectare required to manage protected areas effectively, and how does this vary with management category, geography, and threat?	no	no	10	experienced	Male	conservation	Yes	mass.mail
29	Protected Areas	29. What are the human well-being costs and benefits of protected areas, how are these distributed, and how do they vary with governance, resource tenure arrangements, and site characteristics?	no	no	10	experienced	Male	conservation	Yes	mass.mail
30	Protected Areas	30. How does the management of protected areas affect conservation beyond the boundaries of the protected area, such as through the displacement of human populations, hunting, or fishing?	no	no	10	experienced	Male	conservation	Yes	mass.mail
31	Ecosystem Management and Restoration	31. What is the trade-off for biodiversity between balancing production of natural resources from intensive management systems, such as plantation forestry and aquaculture, versus harvesting those resources from more natural ecosystems?	no	yes	10	experienced	Male	conservation	Yes	mass.mail
32	Ecosystem Management and Restoration	32. What was the condition of ecosystems before significant human disruption, and how can this knowledge be used to improve current and future management?	yes	yes	10	experienced	Male	conservation	Yes	mass.mail
33	Ecosystem Management and Restoration	33. What, and where, are the significant opportunities for large-scale ecosystem restoration that benefits biodiversity and human well-being?	yes	yes	10	experienced	Male	conservation	Yes	mass.mail
34	Ecosystem Management and Restoration	34. How can ecosystem management systems be designed to better emulate natural processes, notably natural disturbance regimes, and to what extent does this improve conservation effectiveness?	yes	yes	10	experienced	Male	conservation	Yes	mass.mail
35	Ecosystem Management and Restoration	35. To what extent, and under what conditions, does the integration of marine, terrestrial, and freshwater ecosystems within conservation plans yield better outcomes than plans based on single realms?	no	yes	10	experienced	Male	conservation	Yes	mass.mail
36	Ecosystem Management and Restoration	36. What spatial pattern of human settlement (e.g., clustered vs. dispersed) has the least impact on biodiversity?	no	yes	10	experienced	Male	conservation	Yes	mass.mail
37	Ecosystem Management and Restoration	37. What is the contribution of areas that are intensively managed for production of commodities (such as food, timber, or biofuels) to conservation of biodiversity at the landscape scale?	no	no	10	experienced	Male	conservation	Yes	mass.mail
38	Ecosystem Management and Restoration	38. How can an understanding of factors affecting household decisions to invest in different naturalresource- based productive activities (e.g., agriculture, fishing, or hunting) be used to predict the biodiversity impacts of household responses to environmental change?	no	no	10	experienced	Male	conservation	Yes	mass.mail
39	Terrestrial Ecosystems	39. What are the impacts on biodiversity and ecosystem services of biofuel production and how will these vary by feedstock type, location, objective, and technology applied?	no	no	10	experienced	Male	conservation	Yes	mass.mail
40	Terrestrial Ecosystems	40. Under what conditions can agricultural intensification contribute to conserving overall biodiversity by reducing pressure to convert natural ecosystems?	no	yes	10	experienced	Male	conservation	Yes	mass.mail
41	Terrestrial Ecosystems	41. What are the impacts (on and off site) on agricultural returns and biodiversity of “biodiversity-friendly” agricultural practices, such as organic, minimum tillage, and agroenvironment schemes?	no	yes	10	experienced	Male	conservation	Yes	mass.mail
42	Terrestrial Ecosystems	42. Under what circumstances can afforestation, reforestation, and reduced emissions from deforestation and degradation (REDD) benefit biodiversity conservation, reduce emissions, and provide sustainable livelihoods?	no	yes	10	experienced	Male	conservation	Yes	mass.mail
43	Terrestrial Ecosystems	43. How do different forms of forest governance influence biodiversity conservation outcomes and the implementation of REDD?	no	no	10	experienced	Male	conservation	Yes	mass.mail
44	Terrestrial Ecosystems	44. How are arid and semiarid ecosystems affected by the interaction of multiple stressors such as grazing by domestic livestock, soil erosion, and drought?	no	yes	10	experienced	Male	conservation	Yes	mass.mail
45	Terrestrial Ecosystems	45. What are the contributions of urban nature reserves and other green amenity spaces, such as golf courses, to biodiversity conservation, and how can these be enhanced?	no	yes	10	experienced	Male	conservation	Yes	mass.mail
46	Marine Ecosystems	46. How will ocean acidification affect marine biodiversity and ecosystem function, and what measures could mitigate these effects?	yes	yes	10	experienced	Male	conservation	Yes	mass.mail
47	Marine Ecosystems	47. What are the ecological, social, and economic impacts resulting from the expansion of freshwater and marine aquaculture?	no	no	10	experienced	Male	conservation	Yes	mass.mail
48	Marine Ecosystems	48. Which management actions are most effective for ensuring the long-term survival of coral reefs in response to the combined impacts of climate change and other existing stressors?	yes	yes	10	experienced	Male	conservation	Yes	mass.mail
49	Marine Ecosystems	49. Which management approaches to fisheries are most effective at mitigating the impacts of fish extraction and fishing gear on nontarget species and their habitats?	no	no	10	experienced	Male	conservation	Yes	mass.mail
50	Marine Ecosystems	50. How does the effectiveness of marine protected areas vary with biological, physical, and social factors and with connectivity to other protected areas?	no	yes	10	experienced	Male	conservation	Yes	mass.mail
51	Marine Ecosystems	51. What will be the impacts of climate change on phytoplankton and oceanic productivity, and what will be the feedbacks of these impacts on the climate?	yes	yes	10	experienced	Male	conservation	Yes	mass.mail
52	Marine Ecosystems	52. How will multiple stressors, especially fishing, pollution, sea temperature fluctuations, acidification, and diseases, interact to affect marine ecosystems?	yes	yes	10	experienced	Male	conservation	Yes	mass.mail
53	Marine Ecosystems	53. Which mechanisms are most effective at conserving biodiversity in ocean areas occurring outside the legal jurisdiction of any single country?	no	no	10	experienced	Male	conservation	Yes	mass.mail
54	Freshwater Ecosystems	54. How can freshwater biodiversity and ecosystem service values best be incorporated in the design of water-provisioning schemes for direct human use and food production?	no	no	10	experienced	Male	conservation	Yes	mass.mail
55	Freshwater Ecosystems	55. Which aquatic species and communities are most vulnerable to human impacts, and how would their degradation affect the provision of ecosystem services?	yes	yes	10	experienced	Male	conservation	Yes	mass.mail
56	Freshwater Ecosystems	56. Where will the impacts of global climate change on hydrology be most extreme, and how might they affect freshwater species and the ability of wetlands and inland waters to deliver ecosystem services?	yes	yes	10	experienced	Male	conservation	Yes	mass.mail
57	Freshwater Ecosystems	57. Which multinational governance, cross-sector cooperation arrangements, and finance mechanisms will make freshwater ecosystem management more effective and reduce international conflicts over water?	no	no	10	experienced	Male	conservation	Yes	mass.mail
58	Freshwater Ecosystems	58. How does investment in restoration of wetlands and riparian areas compare with construction of dams and flood defenses in providing cost-effective improvements in flood management and the storage and retention of water for domestic, industrial, and agricultural use?	no	no	10	experienced	Male	conservation	Yes	mass.mail
59	Species Management	59. Under what conditions is trade in captive or wildharvested species beneficial for wild populations of the traded species?	no	no	10	experienced	Male	conservation	Yes	mass.mail
60	Species Management	60. What information is required to enable responsible authorities to decide when and how to manage nonnative species?	no	yes	10	experienced	Male	conservation	Yes	mass.mail
61	Species Management	61. What is the relative effectiveness of different methods for facilitating movement of a species among disjunct patches of its habitat?	no	no	10	experienced	Male	conservation	Yes	mass.mail
62	Species Management	62. What is the cost-effectiveness of different contributions to species conservation programs such as education, captive breeding, and habitat management?	no	no	10	experienced	Male	conservation	Yes	mass.mail
63	Species Management	63. What are the ecosystem impacts of efforts to conserve charismatic, flagship, or umbrella species?	no	yes	10	experienced	Male	conservation	Yes	mass.mail
64	Species Management	64. What are the likely risks, costs, and benefits of reintroducing and translocating species as a response to climate change?	no	yes	10	experienced	Male	conservation	Yes	mass.mail
65	Species Management	65. What are the most effective approaches for reversing range and population collapse in top predators, large herbivores, and other species that exert disproportionate effects on ecosystem structure and function?	no	yes	10	experienced	Male	conservation	Yes	mass.mail
66	Species Management	66. How can we best manage diseases that have the potential to move among wild species, domestic species, and people?	no	no	10	experienced	Male	conservation	Yes	mass.mail
67	Organizational Systems and Processes	67. How do the characteristics of the organizations (e.g., government vs. nongovernment) and their funding (e.g., amount and duration of funds) shape the effectiveness of conservation interventions?	no	no	10	experienced	Male	conservation	Yes	mass.mail
68	Organizational Systems and Processes	68. What factors affect the extent to which practitioners integrate consideration of human needs and preferences into policy and practice?	no	no	10	experienced	Male	conservation	Yes	mass.mail
69	Organizational Systems and Processes	69. What is the cost-effectiveness of different approaches for rapidly expanding professional conservation capacity, and how does this vary with circumstances and among countries?	no	no	10	experienced	Male	conservation	Yes	mass.mail
70	Organizational Systems and Processes	70. What is the effectiveness of the different mechanisms used to foster the evaluation and dissemination of conservation interventions?	no	no	10	experienced	Male	conservation	Yes	mass.mail
71	Organizational Systems and Processes	71. How effective are the different strategies devised to integrate scientific knowledge into conservation policy and practice?	no	no	10	experienced	Male	conservation	Yes	mass.mail
72	Organizational Systems and Processes	72. How effective are the different mechanisms used to promote data sharing and collaboration among individuals, conservationists, and conservation organizations?	no	no	10	experienced	Male	conservation	Yes	mass.mail
73	Societal Context and Change	73. What are the impacts on biodiversity of shifting patterns and trends in human demography, economic activity, consumption, and technology?	no	yes	10	experienced	Male	conservation	Yes	mass.mail
74	Societal Context and Change	74. How does the relationship between economic growth and biodiversity vary across scales, among different types of ecosystems, and with the type of economic activity?	no	no	10	experienced	Male	conservation	Yes	mass.mail
75	Societal Context and Change	75. What are the direct and indirect impacts of armed conflict on biodiversity?	no	no	10	experienced	Male	conservation	Yes	mass.mail
76	Societal Context and Change	76. What are the biodiversity impacts of changes in energy prices?	no	no	10	experienced	Male	conservation	Yes	mass.mail
77	Societal Context and Change	77. How do resource tenure systems shape conservation outcomes in different social and ecological contexts?	no	yes	10	experienced	Male	conservation	Yes	mass.mail
78	Societal Context and Change	78. What are the impacts of international trade agreements and related policy instruments on biodiversity?	no	no	10	experienced	Male	conservation	Yes	mass.mail
79	Societal Context and Change	79. How do economic subsidies affect biodiversity within the recipient country and elsewhere?	no	no	10	experienced	Male	conservation	Yes	mass.mail
80	Societal Context and Change	80. How does corruption influence the effectiveness of conservation, and what are the most effective ways of preventing negative consequences?	no	no	10	experienced	Male	conservation	Yes	mass.mail
81	Societal Context and Change	81. What are the conservation impacts of improved access to education, employment, and reproductive choice?	no	no	10	experienced	Male	conservation	Yes	mass.mail
82	Societal Context and Change	82. What is the relationship between individuals learning about environmental problems and their conservation attitudes, knowledge, beliefs, and behaviors?	no	no	10	experienced	Male	conservation	Yes	mass.mail
83	Societal Context and Change	83. What are the impacts of increasing human dissociation from nature on the conservation of biodiversity?	no	no	10	experienced	Male	conservation	Yes	mass.mail
84	Societal Context and Change	84. What are the effects of changes in human patterns of food consumption on biodiversity (e.g., shift from bushmeat to domestic meat and from fish to plantbased protein), and how are such human patterns of food consumption shaped by education programs, financial incentives, and other policy instruments?	no	yes	10	experienced	Male	conservation	Yes	mass.mail
85	Societal Context and Change	85. What factors shape human (in)tolerance of the presence and activities ofwild animals, especially where those animals induce human–wildlife conflict?	no	yes	10	experienced	Male	conservation	Yes	mass.mail
86	Impacts of Conservation Interventions	86. What have been the impacts on biodiversity of the Convention on Biological Diversity 2010 targets, and what objectives, mechanism, time frame, and means of measurement would be most effective for future targets?	no	yes	10	experienced	Male	conservation	Yes	mass.mail
87	Impacts of Conservation Interventions	87. How do different values (e.g., use vs. preservation) and the framing of these values (e.g., ecosystem services vs. species) motivate policy makers to assign public resources to conservation programs and policies?	no	yes	10	experienced	Male	conservation	Yes	mass.mail
88	Impacts of Conservation Interventions	88. What factors shape individual and state compliance with local, national, and international conservation regimes?	no	no	10	experienced	Male	conservation	Yes	mass.mail
89	Impacts of Conservation Interventions	89. What are the consequences of investment in improving knowledge (e.g., status, nature of threat, and effectiveness of interventions) versus expenditure on conservation action, and how does this differ among conservation issues?	no	no	10	experienced	Male	conservation	Yes	mass.mail
90	Impacts of Conservation Interventions	90. What are the impacts on biodiversity and human well-being of differing approaches to devolving the responsibility for natural resource management?	no	no	10	experienced	Male	conservation	Yes	mass.mail
91	Impacts of Conservation Interventions	91. What are the impacts of different conservation incentive programs on biodiversity and human wellbeing?	no	no	10	experienced	Male	conservation	Yes	mass.mail
92	Impacts of Conservation Interventions	92. How does public involvement, especially of marginalized groups, in conservation decision making shape the effectiveness of conservation interventions?	no	no	10	experienced	Male	conservation	Yes	mass.mail
93	Impacts of Conservation Interventions	93. What are the impacts of free, prior, and informed consent policies on the emergence, evolution, and performance of conservation interventions?	no	no	10	experienced	Male	conservation	Yes	mass.mail
94	Impacts of Conservation Interventions	94. How does providing information to resource users affect individual behavior and support for collective restrictions, and how does the effect vary with different means of providing the information?	no	no	10	experienced	Male	conservation	Yes	mass.mail
95	Impacts of Conservation Interventions	95. What are the conservation impacts of corporate social responsibility regimes that are biodiversityoriented?	no	no	10	experienced	Male	conservation	Yes	mass.mail
96	Impacts of Conservation Interventions	96. What are the social impacts of conservation interventions, and how and why do these impacts vary among social groups (e.g., elites, poor, women, and indigenous)?	no	no	10	experienced	Male	conservation	Yes	mass.mail
97	Impacts of Conservation Interventions	97. What factors shape the likelihood and extent of formal recognition of customary rights and traditional institutions as the basis for conservation policy and practices, and what are the impacts of this formal recognition on conservation outcomes?	no	yes	10	experienced	Male	conservation	Yes	mass.mail
98	Impacts of Conservation Interventions	98. What are the most cost-effectivemeans of encouraging broad, long-lasting, and active societal support and action for conservation in different contexts and among different actors?	no	no	10	experienced	Male	conservation	Yes	mass.mail
99	Impacts of Conservation Interventions	99. What has been the effect of environmental impact assessments on biodiversity conservation?	no	no	10	experienced	Male	conservation	Yes	mass.mail
100	Impacts of Conservation Interventions	100. What mechanisms best promote the use of local ideas and knowledge in conservation programs in ways that enhance biodiversity outcomes?	no	no	10	experienced	Male	conservation	Yes	mass.mail
1	Ecosystem Function and Services	Do critical thresholds exist at which the loss of species diversity, or the loss of particular species, disrupts ecosystem functions and services, and how can these thresholds be predicted?	yes	yes	11	experienced	Male	palaeo	Yes	mass.mail
2	Ecosystem Function and Services	What is the effectiveness of different methods for the assessment of ecosystem services?	no	no	11	experienced	Male	palaeo	Yes	mass.mail
3	Ecosystem Function and Services	How can biodiversity considerations be integrated into economic policies to reflect the monetary and nonmonetary value of biodiversity, ecosystem processes, goods, and services?	no	no	11	experienced	Male	palaeo	Yes	mass.mail
4	Ecosystem Function and Services	How can ecosystems be managed to increase protection of humans and biodiversity from extreme events?	no	yes	11	experienced	Male	palaeo	Yes	mass.mail
5	Ecosystem Function and Services	How, where, and when has biodiversity loss affected human welfare?	no	yes	11	experienced	Male	palaeo	Yes	mass.mail
6	Ecosystem Function and Services	What strategies for distributing the material benefits derived from biodiversity most effectively foster environmental stewardship and biodiversity conservation?	no	no	11	experienced	Male	palaeo	Yes	mass.mail
7	Ecosystem Function and Services	How can protected area networks be designed to increase carbon storage benefits and mitigate climate impacts, with these benefits as incentives to support conservation actions?	no	no	11	experienced	Male	palaeo	Yes	mass.mail
8	Ecosystem Function and Services	How does soil biodiversity contribute to the extent and persistence of ecosystem services, including agricultural productivity?	no	no	11	experienced	Male	palaeo	Yes	mass.mail
9	Climate Change	9. What impact will the melting of polar ice and a reduction in permafrost have on the human use of high-latitude ecosystems, and how will these changes in human use affect biodiversity?	yes	yes	11	experienced	Male	palaeo	Yes	mass.mail
10	Climate Change	10. Which elements of biodiversity in which locations are most vulnerable to climate change, including extreme events?	yes	yes	11	experienced	Male	palaeo	Yes	mass.mail
11	Climate Change	11. How is the resilience of ecosystems to climate change affected by human activities and interventions?	no	no	11	experienced	Male	palaeo	Yes	mass.mail
12	Climate Change	12. What factors determine the rates at which coastal ecosystems can respond to sea-level rise, and which of these are amenable to management?	yes	yes	11	experienced	Male	palaeo	Yes	mass.mail
13	Climate Change	13. How will climate change, together with other environmental stressors, alter the distribution and prevalence of diseases of wild species?	no	no	11	experienced	Male	palaeo	Yes	mass.mail
14	Climate Change	14. How will human responses to climate change (e.g., changes in agriculture, resource conflicts, and migration) affect biodiversity?	no	yes	11	experienced	Male	palaeo	Yes	mass.mail
15	Climate Change	15. How might biodiversity policies and management practices be modified and implemented to accommodate climate change?	yes	yes	11	experienced	Male	palaeo	Yes	mass.mail
16	Climate Change	16. How might emerging carbon markets affect biodiversity through their impacts on the protection, management, and creation of habitats?	no	no	11	experienced	Male	palaeo	Yes	mass.mail
17	Climate Change	17. What are the potential effects of feedbacks between climate change and ecosystem dynamics (e.g., drought, forest dieback, and coral bleaching) on the effectiveness of policy measures to sequester carbon and protect biodiversity?	yes	yes	11	experienced	Male	palaeo	Yes	mass.mail
18	Climate Change	18. How much carbon is sequestered by different ecosystems, including their soils, and how can these ecosystems be managed to contribute most effectively to the mitigation of climate change?	no	no	11	experienced	Male	palaeo	Yes	mass.mail
19	Climate Change	19. How, where, and to what extent can natural and seminatural ecosystems contribute to climate change adaptation and mitigation?	yes	yes	11	experienced	Male	palaeo	Yes	mass.mail
20	Climate Change	20. How will climate change affect the distribution and impacts of climate-dependent disturbance regimes, such as fire?	no	yes	11	experienced	Male	palaeo	Yes	mass.mail
21	Climate Change	21. How will climate change affect global food production, and what are the resulting consequences for ecosystems and agrobiodiversity?	no	yes	11	experienced	Male	palaeo	Yes	mass.mail
22	Climate Change	22. How does biodiversity shape social resilience to the effects of climate change?	no	no	11	experienced	Male	palaeo	Yes	mass.mail
23	Technological Change	23. How might nanotechnology have positive or negative impacts on biodiversity conservation?	no	no	11	experienced	Male	palaeo	Yes	mass.mail
24	Technological Change	24. How do the type, location, and associated mitigation measures of renewable energy technologies affect biodiversity?	no	no	11	experienced	Male	palaeo	Yes	mass.mail
25	Technological Change	25. What are the direct and indirect impacts of genetically modified organisms on biodiversity?	no	no	11	experienced	Male	palaeo	Yes	mass.mail
26	Technological Change	26. What are the implications for land use and biodiversity of the new and emerging “bioeconomy” markets (crops for pharmaceuticals, plastics, adhesives, etc.)?	no	no	11	experienced	Male	palaeo	Yes	mass.mail
27	Protected Areas	27. How effective are different types of protected areas (e.g., strict nature reserves, hunting reserves, and national parks) at conserving biodiversity and providing ecosystem services?	no	no	11	experienced	Male	palaeo	Yes	mass.mail
28	Protected Areas	28. What is the management cost per hectare required to manage protected areas effectively, and how does this vary with management category, geography, and threat?	no	no	11	experienced	Male	palaeo	Yes	mass.mail
29	Protected Areas	29. What are the human well-being costs and benefits of protected areas, how are these distributed, and how do they vary with governance, resource tenure arrangements, and site characteristics?	no	no	11	experienced	Male	palaeo	Yes	mass.mail
30	Protected Areas	30. How does the management of protected areas affect conservation beyond the boundaries of the protected area, such as through the displacement of human populations, hunting, or fishing?	no	no	11	experienced	Male	palaeo	Yes	mass.mail
31	Ecosystem Management and Restoration	31. What is the trade-off for biodiversity between balancing production of natural resources from intensive management systems, such as plantation forestry and aquaculture, versus harvesting those resources from more natural ecosystems?	no	no	11	experienced	Male	palaeo	Yes	mass.mail
32	Ecosystem Management and Restoration	32. What was the condition of ecosystems before significant human disruption, and how can this knowledge be used to improve current and future management?	yes	yes	11	experienced	Male	palaeo	Yes	mass.mail
33	Ecosystem Management and Restoration	33. What, and where, are the significant opportunities for large-scale ecosystem restoration that benefits biodiversity and human well-being?	no	no	11	experienced	Male	palaeo	Yes	mass.mail
34	Ecosystem Management and Restoration	34. How can ecosystem management systems be designed to better emulate natural processes, notably natural disturbance regimes, and to what extent does this improve conservation effectiveness?	no	yes	11	experienced	Male	palaeo	Yes	mass.mail
35	Ecosystem Management and Restoration	35. To what extent, and under what conditions, does the integration of marine, terrestrial, and freshwater ecosystems within conservation plans yield better outcomes than plans based on single realms?	no	no	11	experienced	Male	palaeo	Yes	mass.mail
36	Ecosystem Management and Restoration	36. What spatial pattern of human settlement (e.g., clustered vs. dispersed) has the least impact on biodiversity?	no	no	11	experienced	Male	palaeo	Yes	mass.mail
37	Ecosystem Management and Restoration	37. What is the contribution of areas that are intensively managed for production of commodities (such as food, timber, or biofuels) to conservation of biodiversity at the landscape scale?	no	no	11	experienced	Male	palaeo	Yes	mass.mail
38	Ecosystem Management and Restoration	38. How can an understanding of factors affecting household decisions to invest in different naturalresource- based productive activities (e.g., agriculture, fishing, or hunting) be used to predict the biodiversity impacts of household responses to environmental change?	no	no	11	experienced	Male	palaeo	Yes	mass.mail
39	Terrestrial Ecosystems	39. What are the impacts on biodiversity and ecosystem services of biofuel production and how will these vary by feedstock type, location, objective, and technology applied?	no	no	11	experienced	Male	palaeo	Yes	mass.mail
40	Terrestrial Ecosystems	40. Under what conditions can agricultural intensification contribute to conserving overall biodiversity by reducing pressure to convert natural ecosystems?	no	no	11	experienced	Male	palaeo	Yes	mass.mail
41	Terrestrial Ecosystems	41. What are the impacts (on and off site) on agricultural returns and biodiversity of “biodiversity-friendly” agricultural practices, such as organic, minimum tillage, and agroenvironment schemes?	no	no	11	experienced	Male	palaeo	Yes	mass.mail
42	Terrestrial Ecosystems	42. Under what circumstances can afforestation, reforestation, and reduced emissions from deforestation and degradation (REDD) benefit biodiversity conservation, reduce emissions, and provide sustainable livelihoods?	no	yes	11	experienced	Male	palaeo	Yes	mass.mail
43	Terrestrial Ecosystems	43. How do different forms of forest governance influence biodiversity conservation outcomes and the implementation of REDD?	no	no	11	experienced	Male	palaeo	Yes	mass.mail
44	Terrestrial Ecosystems	44. How are arid and semiarid ecosystems affected by the interaction of multiple stressors such as grazing by domestic livestock, soil erosion, and drought?	no	yes	11	experienced	Male	palaeo	Yes	mass.mail
45	Terrestrial Ecosystems	45. What are the contributions of urban nature reserves and other green amenity spaces, such as golf courses, to biodiversity conservation, and how can these be enhanced?	no	no	11	experienced	Male	palaeo	Yes	mass.mail
46	Marine Ecosystems	46. How will ocean acidification affect marine biodiversity and ecosystem function, and what measures could mitigate these effects?	yes	no	11	experienced	Male	palaeo	Yes	mass.mail
47	Marine Ecosystems	47. What are the ecological, social, and economic impacts resulting from the expansion of freshwater and marine aquaculture?	no	no	11	experienced	Male	palaeo	Yes	mass.mail
48	Marine Ecosystems	48. Which management actions are most effective for ensuring the long-term survival of coral reefs in response to the combined impacts of climate change and other existing stressors?	yes	yes	11	experienced	Male	palaeo	Yes	mass.mail
49	Marine Ecosystems	49. Which management approaches to fisheries are most effective at mitigating the impacts of fish extraction and fishing gear on nontarget species and their habitats?	no	no	11	experienced	Male	palaeo	Yes	mass.mail
50	Marine Ecosystems	50. How does the effectiveness of marine protected areas vary with biological, physical, and social factors and with connectivity to other protected areas?	yes	yes	11	experienced	Male	palaeo	Yes	mass.mail
51	Marine Ecosystems	51. What will be the impacts of climate change on phytoplankton and oceanic productivity, and what will be the feedbacks of these impacts on the climate?	yes	yes	11	experienced	Male	palaeo	Yes	mass.mail
52	Marine Ecosystems	52. How will multiple stressors, especially fishing, pollution, sea temperature fluctuations, acidification, and diseases, interact to affect marine ecosystems?	no	no	11	experienced	Male	palaeo	Yes	mass.mail
53	Marine Ecosystems	53. Which mechanisms are most effective at conserving biodiversity in ocean areas occurring outside the legal jurisdiction of any single country?	no	no	11	experienced	Male	palaeo	Yes	mass.mail
54	Freshwater Ecosystems	54. How can freshwater biodiversity and ecosystem service values best be incorporated in the design of water-provisioning schemes for direct human use and food production?	no	no	11	experienced	Male	palaeo	Yes	mass.mail
55	Freshwater Ecosystems	55. Which aquatic species and communities are most vulnerable to human impacts, and how would their degradation affect the provision of ecosystem services?	no	yes	11	experienced	Male	palaeo	Yes	mass.mail
56	Freshwater Ecosystems	56. Where will the impacts of global climate change on hydrology be most extreme, and how might they affect freshwater species and the ability of wetlands and inland waters to deliver ecosystem services?	yes	yes	11	experienced	Male	palaeo	Yes	mass.mail
57	Freshwater Ecosystems	57. Which multinational governance, cross-sector cooperation arrangements, and finance mechanisms will make freshwater ecosystem management more effective and reduce international conflicts over water?	no	no	11	experienced	Male	palaeo	Yes	mass.mail
58	Freshwater Ecosystems	58. How does investment in restoration of wetlands and riparian areas compare with construction of dams and flood defenses in providing cost-effective improvements in flood management and the storage and retention of water for domestic, industrial, and agricultural use?	no	no	11	experienced	Male	palaeo	Yes	mass.mail
59	Species Management	59. Under what conditions is trade in captive or wildharvested species beneficial for wild populations of the traded species?	no	no	11	experienced	Male	palaeo	Yes	mass.mail
60	Species Management	60. What information is required to enable responsible authorities to decide when and how to manage nonnative species?	no	yes	11	experienced	Male	palaeo	Yes	mass.mail
61	Species Management	61. What is the relative effectiveness of different methods for facilitating movement of a species among disjunct patches of its habitat?	no	no	11	experienced	Male	palaeo	Yes	mass.mail
62	Species Management	62. What is the cost-effectiveness of different contributions to species conservation programs such as education, captive breeding, and habitat management?	no	no	11	experienced	Male	palaeo	Yes	mass.mail
63	Species Management	63. What are the ecosystem impacts of efforts to conserve charismatic, flagship, or umbrella species?	yes	yes	11	experienced	Male	palaeo	Yes	mass.mail
64	Species Management	64. What are the likely risks, costs, and benefits of reintroducing and translocating species as a response to climate change?	yes	yes	11	experienced	Male	palaeo	Yes	mass.mail
65	Species Management	65. What are the most effective approaches for reversing range and population collapse in top predators, large herbivores, and other species that exert disproportionate effects on ecosystem structure and function?	yes	yes	11	experienced	Male	palaeo	Yes	mass.mail
66	Species Management	66. How can we best manage diseases that have the potential to move among wild species, domestic species, and people?	no	no	11	experienced	Male	palaeo	Yes	mass.mail
67	Organizational Systems and Processes	67. How do the characteristics of the organizations (e.g., government vs. nongovernment) and their funding (e.g., amount and duration of funds) shape the effectiveness of conservation interventions?	no	no	11	experienced	Male	palaeo	Yes	mass.mail
68	Organizational Systems and Processes	68. What factors affect the extent to which practitioners integrate consideration of human needs and preferences into policy and practice?	no	no	11	experienced	Male	palaeo	Yes	mass.mail
69	Organizational Systems and Processes	69. What is the cost-effectiveness of different approaches for rapidly expanding professional conservation capacity, and how does this vary with circumstances and among countries?	no	no	11	experienced	Male	palaeo	Yes	mass.mail
70	Organizational Systems and Processes	70. What is the effectiveness of the different mechanisms used to foster the evaluation and dissemination of conservation interventions?	no	no	11	experienced	Male	palaeo	Yes	mass.mail
71	Organizational Systems and Processes	71. How effective are the different strategies devised to integrate scientific knowledge into conservation policy and practice?	no	no	11	experienced	Male	palaeo	Yes	mass.mail
72	Organizational Systems and Processes	72. How effective are the different mechanisms used to promote data sharing and collaboration among individuals, conservationists, and conservation organizations?	no	no	11	experienced	Male	palaeo	Yes	mass.mail
73	Societal Context and Change	73. What are the impacts on biodiversity of shifting patterns and trends in human demography, economic activity, consumption, and technology?	no	no	11	experienced	Male	palaeo	Yes	mass.mail
74	Societal Context and Change	74. How does the relationship between economic growth and biodiversity vary across scales, among different types of ecosystems, and with the type of economic activity?	no	no	11	experienced	Male	palaeo	Yes	mass.mail
75	Societal Context and Change	75. What are the direct and indirect impacts of armed conflict on biodiversity?	no	no	11	experienced	Male	palaeo	Yes	mass.mail
76	Societal Context and Change	76. What are the biodiversity impacts of changes in energy prices?	no	no	11	experienced	Male	palaeo	Yes	mass.mail
77	Societal Context and Change	77. How do resource tenure systems shape conservation outcomes in different social and ecological contexts?	no	no	11	experienced	Male	palaeo	Yes	mass.mail
78	Societal Context and Change	78. What are the impacts of international trade agreements and related policy instruments on biodiversity?	no	no	11	experienced	Male	palaeo	Yes	mass.mail
79	Societal Context and Change	79. How do economic subsidies affect biodiversity within the recipient country and elsewhere?	no	no	11	experienced	Male	palaeo	Yes	mass.mail
80	Societal Context and Change	80. How does corruption influence the effectiveness of conservation, and what are the most effective ways of preventing negative consequences?	no	no	11	experienced	Male	palaeo	Yes	mass.mail
81	Societal Context and Change	81. What are the conservation impacts of improved access to education, employment, and reproductive choice?	no	no	11	experienced	Male	palaeo	Yes	mass.mail
82	Societal Context and Change	82. What is the relationship between individuals learning about environmental problems and their conservation attitudes, knowledge, beliefs, and behaviors?	no	no	11	experienced	Male	palaeo	Yes	mass.mail
83	Societal Context and Change	83. What are the impacts of increasing human dissociation from nature on the conservation of biodiversity?	no	no	11	experienced	Male	palaeo	Yes	mass.mail
84	Societal Context and Change	84. What are the effects of changes in human patterns of food consumption on biodiversity (e.g., shift from bushmeat to domestic meat and from fish to plantbased protein), and how are such human patterns of food consumption shaped by education programs, financial incentives, and other policy instruments?	no	no	11	experienced	Male	palaeo	Yes	mass.mail
85	Societal Context and Change	85. What factors shape human (in)tolerance of the presence and activities ofwild animals, especially where those animals induce human–wildlife conflict?	no	no	11	experienced	Male	palaeo	Yes	mass.mail
86	Impacts of Conservation Interventions	86. What have been the impacts on biodiversity of the Convention on Biological Diversity 2010 targets, and what objectives, mechanism, time frame, and means of measurement would be most effective for future targets?	no	no	11	experienced	Male	palaeo	Yes	mass.mail
87	Impacts of Conservation Interventions	87. How do different values (e.g., use vs. preservation) and the framing of these values (e.g., ecosystem services vs. species) motivate policy makers to assign public resources to conservation programs and policies?	no	no	11	experienced	Male	palaeo	Yes	mass.mail
88	Impacts of Conservation Interventions	88. What factors shape individual and state compliance with local, national, and international conservation regimes?	no	no	11	experienced	Male	palaeo	Yes	mass.mail
89	Impacts of Conservation Interventions	89. What are the consequences of investment in improving knowledge (e.g., status, nature of threat, and effectiveness of interventions) versus expenditure on conservation action, and how does this differ among conservation issues?	no	no	11	experienced	Male	palaeo	Yes	mass.mail
90	Impacts of Conservation Interventions	90. What are the impacts on biodiversity and human well-being of differing approaches to devolving the responsibility for natural resource management?	no	no	11	experienced	Male	palaeo	Yes	mass.mail
91	Impacts of Conservation Interventions	91. What are the impacts of different conservation incentive programs on biodiversity and human wellbeing?	no	no	11	experienced	Male	palaeo	Yes	mass.mail
92	Impacts of Conservation Interventions	92. How does public involvement, especially of marginalized groups, in conservation decision making shape the effectiveness of conservation interventions?	no	no	11	experienced	Male	palaeo	Yes	mass.mail
93	Impacts of Conservation Interventions	93. What are the impacts of free, prior, and informed consent policies on the emergence, evolution, and performance of conservation interventions?	no	no	11	experienced	Male	palaeo	Yes	mass.mail
94	Impacts of Conservation Interventions	94. How does providing information to resource users affect individual behavior and support for collective restrictions, and how does the effect vary with different means of providing the information?	no	no	11	experienced	Male	palaeo	Yes	mass.mail
95	Impacts of Conservation Interventions	95. What are the conservation impacts of corporate social responsibility regimes that are biodiversityoriented?	no	no	11	experienced	Male	palaeo	Yes	mass.mail
96	Impacts of Conservation Interventions	96. What are the social impacts of conservation interventions, and how and why do these impacts vary among social groups (e.g., elites, poor, women, and indigenous)?	no	no	11	experienced	Male	palaeo	Yes	mass.mail
97	Impacts of Conservation Interventions	97. What factors shape the likelihood and extent of formal recognition of customary rights and traditional institutions as the basis for conservation policy and practices, and what are the impacts of this formal recognition on conservation outcomes?	no	no	11	experienced	Male	palaeo	Yes	mass.mail
98	Impacts of Conservation Interventions	98. What are the most cost-effectivemeans of encouraging broad, long-lasting, and active societal support and action for conservation in different contexts and among different actors?	no	no	11	experienced	Male	palaeo	Yes	mass.mail
99	Impacts of Conservation Interventions	99. What has been the effect of environmental impact assessments on biodiversity conservation?	no	no	11	experienced	Male	palaeo	Yes	mass.mail
100	Impacts of Conservation Interventions	100. What mechanisms best promote the use of local ideas and knowledge in conservation programs in ways that enhance biodiversity outcomes?	no	no	11	experienced	Male	palaeo	Yes	mass.mail
1	Ecosystem Function and Services	Do critical thresholds exist at which the loss of species diversity, or the loss of particular species, disrupts ecosystem functions and services, and how can these thresholds be predicted?	yes	yes	12	student	Female	palaeo	No	online.form
2	Ecosystem Function and Services	What is the effectiveness of different methods for the assessment of ecosystem services?	yes	yes	12	student	Female	palaeo	No	online.form
3	Ecosystem Function and Services	How can biodiversity considerations be integrated into economic policies to reflect the monetary and nonmonetary value of biodiversity, ecosystem processes, goods, and services?	no	yes	12	student	Female	palaeo	No	online.form
4	Ecosystem Function and Services	How can ecosystems be managed to increase protection of humans and biodiversity from extreme events?	no	yes	12	student	Female	palaeo	No	online.form
5	Ecosystem Function and Services	How, where, and when has biodiversity loss affected human welfare?	no	yes	12	student	Female	palaeo	No	online.form
6	Ecosystem Function and Services	What strategies for distributing the material benefits derived from biodiversity most effectively foster environmental stewardship and biodiversity conservation?	no	yes	12	student	Female	palaeo	No	online.form
7	Ecosystem Function and Services	How can protected area networks be designed to increase carbon storage benefits and mitigate climate impacts, with these benefits as incentives to support conservation actions?	yes	yes	12	student	Female	palaeo	No	online.form
8	Ecosystem Function and Services	How does soil biodiversity contribute to the extent and persistence of ecosystem services, including agricultural productivity?	yes	yes	12	student	Female	palaeo	No	online.form
9	Climate Change	9. What impact will the melting of polar ice and a reduction in permafrost have on the human use of high-latitude ecosystems, and how will these changes in human use affect biodiversity?	yes	yes	12	student	Female	palaeo	No	online.form
10	Climate Change	10. Which elements of biodiversity in which locations are most vulnerable to climate change, including extreme events?	yes	yes	12	student	Female	palaeo	No	online.form
11	Climate Change	11. How is the resilience of ecosystems to climate change affected by human activities and interventions?	yes	yes	12	student	Female	palaeo	No	online.form
12	Climate Change	12. What factors determine the rates at which coastal ecosystems can respond to sea-level rise, and which of these are amenable to management?	yes	yes	12	student	Female	palaeo	No	online.form
13	Climate Change	13. How will climate change, together with other environmental stressors, alter the distribution and prevalence of diseases of wild species?	yes	yes	12	student	Female	palaeo	No	online.form
14	Climate Change	14. How will human responses to climate change (e.g., changes in agriculture, resource conflicts, and migration) affect biodiversity?	no	yes	12	student	Female	palaeo	No	online.form
15	Climate Change	15. How might biodiversity policies and management practices be modified and implemented to accommodate climate change?	no	yes	12	student	Female	palaeo	No	online.form
16	Climate Change	16. How might emerging carbon markets affect biodiversity through their impacts on the protection, management, and creation of habitats?	no	yes	12	student	Female	palaeo	No	online.form
17	Climate Change	17. What are the potential effects of feedbacks between climate change and ecosystem dynamics (e.g., drought, forest dieback, and coral bleaching) on the effectiveness of policy measures to sequester carbon and protect biodiversity?	yes	yes	12	student	Female	palaeo	No	online.form
18	Climate Change	18. How much carbon is sequestered by different ecosystems, including their soils, and how can these ecosystems be managed to contribute most effectively to the mitigation of climate change?	yes	yes	12	student	Female	palaeo	No	online.form
19	Climate Change	19. How, where, and to what extent can natural and seminatural ecosystems contribute to climate change adaptation and mitigation?	yes	yes	12	student	Female	palaeo	No	online.form
20	Climate Change	20. How will climate change affect the distribution and impacts of climate-dependent disturbance regimes, such as fire?	yes	yes	12	student	Female	palaeo	No	online.form
21	Climate Change	21. How will climate change affect global food production, and what are the resulting consequences for ecosystems and agrobiodiversity?	no	yes	12	student	Female	palaeo	No	online.form
22	Climate Change	22. How does biodiversity shape social resilience to the effects of climate change?	no	yes	12	student	Female	palaeo	No	online.form
23	Technological Change	23. How might nanotechnology have positive or negative impacts on biodiversity conservation?	no	no	12	student	Female	palaeo	No	online.form
24	Technological Change	24. How do the type, location, and associated mitigation measures of renewable energy technologies affect biodiversity?	no	no	12	student	Female	palaeo	No	online.form
25	Technological Change	25. What are the direct and indirect impacts of genetically modified organisms on biodiversity?	no	yes	12	student	Female	palaeo	No	online.form
26	Technological Change	26. What are the implications for land use and biodiversity of the new and emerging “bioeconomy” markets (crops for pharmaceuticals, plastics, adhesives, etc.)?	no	no	12	student	Female	palaeo	No	online.form
27	Protected Areas	27. How effective are different types of protected areas (e.g., strict nature reserves, hunting reserves, and national parks) at conserving biodiversity and providing ecosystem services?	no	yes	12	student	Female	palaeo	No	online.form
28	Protected Areas	28. What is the management cost per hectare required to manage protected areas effectively, and how does this vary with management category, geography, and threat?	no	yes	12	student	Female	palaeo	No	online.form
29	Protected Areas	29. What are the human well-being costs and benefits of protected areas, how are these distributed, and how do they vary with governance, resource tenure arrangements, and site characteristics?	no	yes	12	student	Female	palaeo	No	online.form
30	Protected Areas	30. How does the management of protected areas affect conservation beyond the boundaries of the protected area, such as through the displacement of human populations, hunting, or fishing?	no	yes	12	student	Female	palaeo	No	online.form
31	Ecosystem Management and Restoration	31. What is the trade-off for biodiversity between balancing production of natural resources from intensive management systems, such as plantation forestry and aquaculture, versus harvesting those resources from more natural ecosystems?	yes	yes	12	student	Female	palaeo	No	online.form
32	Ecosystem Management and Restoration	32. What was the condition of ecosystems before significant human disruption, and how can this knowledge be used to improve current and future management?	yes	no	12	student	Female	palaeo	No	online.form
33	Ecosystem Management and Restoration	33. What, and where, are the significant opportunities for large-scale ecosystem restoration that benefits biodiversity and human well-being?	yes	yes	12	student	Female	palaeo	No	online.form
34	Ecosystem Management and Restoration	34. How can ecosystem management systems be designed to better emulate natural processes, notably natural disturbance regimes, and to what extent does this improve conservation effectiveness?	no	yes	12	student	Female	palaeo	No	online.form
35	Ecosystem Management and Restoration	35. To what extent, and under what conditions, does the integration of marine, terrestrial, and freshwater ecosystems within conservation plans yield better outcomes than plans based on single realms?	yes	yes	12	student	Female	palaeo	No	online.form
36	Ecosystem Management and Restoration	36. What spatial pattern of human settlement (e.g., clustered vs. dispersed) has the least impact on biodiversity?	no	yes	12	student	Female	palaeo	No	online.form
37	Ecosystem Management and Restoration	37. What is the contribution of areas that are intensively managed for production of commodities (such as food, timber, or biofuels) to conservation of biodiversity at the landscape scale?	no	yes	12	student	Female	palaeo	No	online.form
38	Ecosystem Management and Restoration	38. How can an understanding of factors affecting household decisions to invest in different naturalresource- based productive activities (e.g., agriculture, fishing, or hunting) be used to predict the biodiversity impacts of household responses to environmental change?	no	yes	12	student	Female	palaeo	No	online.form
39	Terrestrial Ecosystems	39. What are the impacts on biodiversity and ecosystem services of biofuel production and how will these vary by feedstock type, location, objective, and technology applied?	no	yes	12	student	Female	palaeo	No	online.form
40	Terrestrial Ecosystems	40. Under what conditions can agricultural intensification contribute to conserving overall biodiversity by reducing pressure to convert natural ecosystems?	no	yes	12	student	Female	palaeo	No	online.form
41	Terrestrial Ecosystems	41. What are the impacts (on and off site) on agricultural returns and biodiversity of “biodiversity-friendly” agricultural practices, such as organic, minimum tillage, and agroenvironment schemes?	no	yes	12	student	Female	palaeo	No	online.form
42	Terrestrial Ecosystems	42. Under what circumstances can afforestation, reforestation, and reduced emissions from deforestation and degradation (REDD) benefit biodiversity conservation, reduce emissions, and provide sustainable livelihoods?	no	yes	12	student	Female	palaeo	No	online.form
43	Terrestrial Ecosystems	43. How do different forms of forest governance influence biodiversity conservation outcomes and the implementation of REDD?	no	yes	12	student	Female	palaeo	No	online.form
44	Terrestrial Ecosystems	44. How are arid and semiarid ecosystems affected by the interaction of multiple stressors such as grazing by domestic livestock, soil erosion, and drought?	yes	yes	12	student	Female	palaeo	No	online.form
45	Terrestrial Ecosystems	45. What are the contributions of urban nature reserves and other green amenity spaces, such as golf courses, to biodiversity conservation, and how can these be enhanced?	no	yes	12	student	Female	palaeo	No	online.form
46	Marine Ecosystems	46. How will ocean acidification affect marine biodiversity and ecosystem function, and what measures could mitigate these effects?	yes	yes	12	student	Female	palaeo	No	online.form
47	Marine Ecosystems	47. What are the ecological, social, and economic impacts resulting from the expansion of freshwater and marine aquaculture?	yes	yes	12	student	Female	palaeo	No	online.form
48	Marine Ecosystems	48. Which management actions are most effective for ensuring the long-term survival of coral reefs in response to the combined impacts of climate change and other existing stressors?	no	yes	12	student	Female	palaeo	No	online.form
49	Marine Ecosystems	49. Which management approaches to fisheries are most effective at mitigating the impacts of fish extraction and fishing gear on nontarget species and their habitats?	no	yes	12	student	Female	palaeo	No	online.form
50	Marine Ecosystems	50. How does the effectiveness of marine protected areas vary with biological, physical, and social factors and with connectivity to other protected areas?	yes	yes	12	student	Female	palaeo	No	online.form
51	Marine Ecosystems	51. What will be the impacts of climate change on phytoplankton and oceanic productivity, and what will be the feedbacks of these impacts on the climate?	yes	yes	12	student	Female	palaeo	No	online.form
52	Marine Ecosystems	52. How will multiple stressors, especially fishing, pollution, sea temperature fluctuations, acidification, and diseases, interact to affect marine ecosystems?	yes	yes	12	student	Female	palaeo	No	online.form
53	Marine Ecosystems	53. Which mechanisms are most effective at conserving biodiversity in ocean areas occurring outside the legal jurisdiction of any single country?	yes	yes	12	student	Female	palaeo	No	online.form
54	Freshwater Ecosystems	54. How can freshwater biodiversity and ecosystem service values best be incorporated in the design of water-provisioning schemes for direct human use and food production?	no	no	12	student	Female	palaeo	No	online.form
55	Freshwater Ecosystems	55. Which aquatic species and communities are most vulnerable to human impacts, and how would their degradation affect the provision of ecosystem services?	yes	yes	12	student	Female	palaeo	No	online.form
56	Freshwater Ecosystems	56. Where will the impacts of global climate change on hydrology be most extreme, and how might they affect freshwater species and the ability of wetlands and inland waters to deliver ecosystem services?	no	no	12	student	Female	palaeo	No	online.form
57	Freshwater Ecosystems	57. Which multinational governance, cross-sector cooperation arrangements, and finance mechanisms will make freshwater ecosystem management more effective and reduce international conflicts over water?	no	no	12	student	Female	palaeo	No	online.form
58	Freshwater Ecosystems	58. How does investment in restoration of wetlands and riparian areas compare with construction of dams and flood defenses in providing cost-effective improvements in flood management and the storage and retention of water for domestic, industrial, and agricultural use?	no	no	12	student	Female	palaeo	No	online.form
59	Species Management	59. Under what conditions is trade in captive or wildharvested species beneficial for wild populations of the traded species?	no	no	12	student	Female	palaeo	No	online.form
60	Species Management	60. What information is required to enable responsible authorities to decide when and how to manage nonnative species?	no	no	12	student	Female	palaeo	No	online.form
61	Species Management	61. What is the relative effectiveness of different methods for facilitating movement of a species among disjunct patches of its habitat?	no	no	12	student	Female	palaeo	No	online.form
62	Species Management	62. What is the cost-effectiveness of different contributions to species conservation programs such as education, captive breeding, and habitat management?	no	no	12	student	Female	palaeo	No	online.form
63	Species Management	63. What are the ecosystem impacts of efforts to conserve charismatic, flagship, or umbrella species?	yes	yes	12	student	Female	palaeo	No	online.form
64	Species Management	64. What are the likely risks, costs, and benefits of reintroducing and translocating species as a response to climate change?	no	yes	12	student	Female	palaeo	No	online.form
65	Species Management	65. What are the most effective approaches for reversing range and population collapse in top predators, large herbivores, and other species that exert disproportionate effects on ecosystem structure and function?	yes	yes	12	student	Female	palaeo	No	online.form
66	Species Management	66. How can we best manage diseases that have the potential to move among wild species, domestic species, and people?	no	yes	12	student	Female	palaeo	No	online.form
67	Organizational Systems and Processes	67. How do the characteristics of the organizations (e.g., government vs. nongovernment) and their funding (e.g., amount and duration of funds) shape the effectiveness of conservation interventions?	no	no	12	student	Female	palaeo	No	online.form
68	Organizational Systems and Processes	68. What factors affect the extent to which practitioners integrate consideration of human needs and preferences into policy and practice?	no	no	12	student	Female	palaeo	No	online.form
69	Organizational Systems and Processes	69. What is the cost-effectiveness of different approaches for rapidly expanding professional conservation capacity, and how does this vary with circumstances and among countries?	no	no	12	student	Female	palaeo	No	online.form
70	Organizational Systems and Processes	70. What is the effectiveness of the different mechanisms used to foster the evaluation and dissemination of conservation interventions?	no	no	12	student	Female	palaeo	No	online.form
71	Organizational Systems and Processes	71. How effective are the different strategies devised to integrate scientific knowledge into conservation policy and practice?	no	no	12	student	Female	palaeo	No	online.form
72	Organizational Systems and Processes	72. How effective are the different mechanisms used to promote data sharing and collaboration among individuals, conservationists, and conservation organizations?	no	no	12	student	Female	palaeo	No	online.form
73	Societal Context and Change	73. What are the impacts on biodiversity of shifting patterns and trends in human demography, economic activity, consumption, and technology?	no	yes	12	student	Female	palaeo	No	online.form
74	Societal Context and Change	74. How does the relationship between economic growth and biodiversity vary across scales, among different types of ecosystems, and with the type of economic activity?	no	no	12	student	Female	palaeo	No	online.form
75	Societal Context and Change	75. What are the direct and indirect impacts of armed conflict on biodiversity?	no	no	12	student	Female	palaeo	No	online.form
76	Societal Context and Change	76. What are the biodiversity impacts of changes in energy prices?	no	no	12	student	Female	palaeo	No	online.form
77	Societal Context and Change	77. How do resource tenure systems shape conservation outcomes in different social and ecological contexts?	no	no	12	student	Female	palaeo	No	online.form
78	Societal Context and Change	78. What are the impacts of international trade agreements and related policy instruments on biodiversity?	no	no	12	student	Female	palaeo	No	online.form
79	Societal Context and Change	79. How do economic subsidies affect biodiversity within the recipient country and elsewhere?	no	no	12	student	Female	palaeo	No	online.form
80	Societal Context and Change	80. How does corruption influence the effectiveness of conservation, and what are the most effective ways of preventing negative consequences?	no	no	12	student	Female	palaeo	No	online.form
81	Societal Context and Change	81. What are the conservation impacts of improved access to education, employment, and reproductive choice?	no	no	12	student	Female	palaeo	No	online.form
82	Societal Context and Change	82. What is the relationship between individuals learning about environmental problems and their conservation attitudes, knowledge, beliefs, and behaviors?	no	no	12	student	Female	palaeo	No	online.form
83	Societal Context and Change	83. What are the impacts of increasing human dissociation from nature on the conservation of biodiversity?	no	no	12	student	Female	palaeo	No	online.form
84	Societal Context and Change	84. What are the effects of changes in human patterns of food consumption on biodiversity (e.g., shift from bushmeat to domestic meat and from fish to plantbased protein), and how are such human patterns of food consumption shaped by education programs, financial incentives, and other policy instruments?	no	no	12	student	Female	palaeo	No	online.form
85	Societal Context and Change	85. What factors shape human (in)tolerance of the presence and activities ofwild animals, especially where those animals induce human–wildlife conflict?	no	no	12	student	Female	palaeo	No	online.form
86	Impacts of Conservation Interventions	86. What have been the impacts on biodiversity of the Convention on Biological Diversity 2010 targets, and what objectives, mechanism, time frame, and means of measurement would be most effective for future targets?	no	no	12	student	Female	palaeo	No	online.form
87	Impacts of Conservation Interventions	87. How do different values (e.g., use vs. preservation) and the framing of these values (e.g., ecosystem services vs. species) motivate policy makers to assign public resources to conservation programs and policies?	no	no	12	student	Female	palaeo	No	online.form
88	Impacts of Conservation Interventions	88. What factors shape individual and state compliance with local, national, and international conservation regimes?	no	no	12	student	Female	palaeo	No	online.form
89	Impacts of Conservation Interventions	89. What are the consequences of investment in improving knowledge (e.g., status, nature of threat, and effectiveness of interventions) versus expenditure on conservation action, and how does this differ among conservation issues?	no	no	12	student	Female	palaeo	No	online.form
90	Impacts of Conservation Interventions	90. What are the impacts on biodiversity and human well-being of differing approaches to devolving the responsibility for natural resource management?	no	no	12	student	Female	palaeo	No	online.form
91	Impacts of Conservation Interventions	91. What are the impacts of different conservation incentive programs on biodiversity and human wellbeing?	no	no	12	student	Female	palaeo	No	online.form
92	Impacts of Conservation Interventions	92. How does public involvement, especially of marginalized groups, in conservation decision making shape the effectiveness of conservation interventions?	no	no	12	student	Female	palaeo	No	online.form
93	Impacts of Conservation Interventions	93. What are the impacts of free, prior, and informed consent policies on the emergence, evolution, and performance of conservation interventions?	no	no	12	student	Female	palaeo	No	online.form
94	Impacts of Conservation Interventions	94. How does providing information to resource users affect individual behavior and support for collective restrictions, and how does the effect vary with different means of providing the information?	no	no	12	student	Female	palaeo	No	online.form
95	Impacts of Conservation Interventions	95. What are the conservation impacts of corporate social responsibility regimes that are biodiversityoriented?	no	no	12	student	Female	palaeo	No	online.form
96	Impacts of Conservation Interventions	96. What are the social impacts of conservation interventions, and how and why do these impacts vary among social groups (e.g., elites, poor, women, and indigenous)?	no	no	12	student	Female	palaeo	No	online.form
97	Impacts of Conservation Interventions	97. What factors shape the likelihood and extent of formal recognition of customary rights and traditional institutions as the basis for conservation policy and practices, and what are the impacts of this formal recognition on conservation outcomes?	no	no	12	student	Female	palaeo	No	online.form
98	Impacts of Conservation Interventions	98. What are the most cost-effectivemeans of encouraging broad, long-lasting, and active societal support and action for conservation in different contexts and among different actors?	no	no	12	student	Female	palaeo	No	online.form
99	Impacts of Conservation Interventions	99. What has been the effect of environmental impact assessments on biodiversity conservation?	no	no	12	student	Female	palaeo	No	online.form
100	Impacts of Conservation Interventions	100. What mechanisms best promote the use of local ideas and knowledge in conservation programs in ways that enhance biodiversity outcomes?	no	no	12	student	Female	palaeo	No	online.form
1	Ecosystem Function and Services	Do critical thresholds exist at which the loss of species diversity, or the loss of particular species, disrupts ecosystem functions and services, and how can these thresholds be predicted?	yes	yes	13	postdoc	Female	conservation	No	online.form
2	Ecosystem Function and Services	What is the effectiveness of different methods for the assessment of ecosystem services?	no	yes	13	postdoc	Female	conservation	No	online.form
3	Ecosystem Function and Services	How can biodiversity considerations be integrated into economic policies to reflect the monetary and nonmonetary value of biodiversity, ecosystem processes, goods, and services?	yes	yes	13	postdoc	Female	conservation	No	online.form
4	Ecosystem Function and Services	How can ecosystems be managed to increase protection of humans and biodiversity from extreme events?	yes	no	13	postdoc	Female	conservation	No	online.form
5	Ecosystem Function and Services	How, where, and when has biodiversity loss affected human welfare?	yes	no	13	postdoc	Female	conservation	No	online.form
6	Ecosystem Function and Services	What strategies for distributing the material benefits derived from biodiversity most effectively foster environmental stewardship and biodiversity conservation?	yes	no	13	postdoc	Female	conservation	No	online.form
7	Ecosystem Function and Services	How can protected area networks be designed to increase carbon storage benefits and mitigate climate impacts, with these benefits as incentives to support conservation actions?	yes	no	13	postdoc	Female	conservation	No	online.form
8	Ecosystem Function and Services	How does soil biodiversity contribute to the extent and persistence of ecosystem services, including agricultural productivity?	no	yes	13	postdoc	Female	conservation	No	online.form
9	Climate Change	9. What impact will the melting of polar ice and a reduction in permafrost have on the human use of high-latitude ecosystems, and how will these changes in human use affect biodiversity?	no	yes	13	postdoc	Female	conservation	No	online.form
10	Climate Change	10. Which elements of biodiversity in which locations are most vulnerable to climate change, including extreme events?	no	yes	13	postdoc	Female	conservation	No	online.form
11	Climate Change	11. How is the resilience of ecosystems to climate change affected by human activities and interventions?	no	yes	13	postdoc	Female	conservation	No	online.form
12	Climate Change	12. What factors determine the rates at which coastal ecosystems can respond to sea-level rise, and which of these are amenable to management?	yes	no	13	postdoc	Female	conservation	No	online.form
13	Climate Change	13. How will climate change, together with other environmental stressors, alter the distribution and prevalence of diseases of wild species?	no	yes	13	postdoc	Female	conservation	No	online.form
14	Climate Change	14. How will human responses to climate change (e.g., changes in agriculture, resource conflicts, and migration) affect biodiversity?	no	yes	13	postdoc	Female	conservation	No	online.form
15	Climate Change	15. How might biodiversity policies and management practices be modified and implemented to accommodate climate change?	yes	no	13	postdoc	Female	conservation	No	online.form
16	Climate Change	16. How might emerging carbon markets affect biodiversity through their impacts on the protection, management, and creation of habitats?	yes	no	13	postdoc	Female	conservation	No	online.form
17	Climate Change	17. What are the potential effects of feedbacks between climate change and ecosystem dynamics (e.g., drought, forest dieback, and coral bleaching) on the effectiveness of policy measures to sequester carbon and protect biodiversity?	yes	no	13	postdoc	Female	conservation	No	online.form
18	Climate Change	18. How much carbon is sequestered by different ecosystems, including their soils, and how can these ecosystems be managed to contribute most effectively to the mitigation of climate change?	yes	no	13	postdoc	Female	conservation	No	online.form
19	Climate Change	19. How, where, and to what extent can natural and seminatural ecosystems contribute to climate change adaptation and mitigation?	yes	no	13	postdoc	Female	conservation	No	online.form
20	Climate Change	20. How will climate change affect the distribution and impacts of climate-dependent disturbance regimes, such as fire?	no	yes	13	postdoc	Female	conservation	No	online.form
21	Climate Change	21. How will climate change affect global food production, and what are the resulting consequences for ecosystems and agrobiodiversity?	no	yes	13	postdoc	Female	conservation	No	online.form
22	Climate Change	22. How does biodiversity shape social resilience to the effects of climate change?	no	yes	13	postdoc	Female	conservation	No	online.form
23	Technological Change	23. How might nanotechnology have positive or negative impacts on biodiversity conservation?	yes	no	13	postdoc	Female	conservation	No	online.form
24	Technological Change	24. How do the type, location, and associated mitigation measures of renewable energy technologies affect biodiversity?	no	yes	13	postdoc	Female	conservation	No	online.form
25	Technological Change	25. What are the direct and indirect impacts of genetically modified organisms on biodiversity?	no	yes	13	postdoc	Female	conservation	No	online.form
26	Technological Change	26. What are the implications for land use and biodiversity of the new and emerging “bioeconomy” markets (crops for pharmaceuticals, plastics, adhesives, etc.)?	no	yes	13	postdoc	Female	conservation	No	online.form
27	Protected Areas	27. How effective are different types of protected areas (e.g., strict nature reserves, hunting reserves, and national parks) at conserving biodiversity and providing ecosystem services?	no	yes	13	postdoc	Female	conservation	No	online.form
28	Protected Areas	28. What is the management cost per hectare required to manage protected areas effectively, and how does this vary with management category, geography, and threat?	no	yes	13	postdoc	Female	conservation	No	online.form
29	Protected Areas	29. What are the human well-being costs and benefits of protected areas, how are these distributed, and how do they vary with governance, resource tenure arrangements, and site characteristics?	no	yes	13	postdoc	Female	conservation	No	online.form
30	Protected Areas	30. How does the management of protected areas affect conservation beyond the boundaries of the protected area, such as through the displacement of human populations, hunting, or fishing?	yes	no	13	postdoc	Female	conservation	No	online.form
31	Ecosystem Management and Restoration	31. What is the trade-off for biodiversity between balancing production of natural resources from intensive management systems, such as plantation forestry and aquaculture, versus harvesting those resources from more natural ecosystems?	yes	no	13	postdoc	Female	conservation	No	online.form
32	Ecosystem Management and Restoration	32. What was the condition of ecosystems before significant human disruption, and how can this knowledge be used to improve current and future management?	no	yes	13	postdoc	Female	conservation	No	online.form
33	Ecosystem Management and Restoration	33. What, and where, are the significant opportunities for large-scale ecosystem restoration that benefits biodiversity and human well-being?	yes	no	13	postdoc	Female	conservation	No	online.form
34	Ecosystem Management and Restoration	34. How can ecosystem management systems be designed to better emulate natural processes, notably natural disturbance regimes, and to what extent does this improve conservation effectiveness?	yes	no	13	postdoc	Female	conservation	No	online.form
35	Ecosystem Management and Restoration	35. To what extent, and under what conditions, does the integration of marine, terrestrial, and freshwater ecosystems within conservation plans yield better outcomes than plans based on single realms?	yes	no	13	postdoc	Female	conservation	No	online.form
36	Ecosystem Management and Restoration	36. What spatial pattern of human settlement (e.g., clustered vs. dispersed) has the least impact on biodiversity?	no	yes	13	postdoc	Female	conservation	No	online.form
37	Ecosystem Management and Restoration	37. What is the contribution of areas that are intensively managed for production of commodities (such as food, timber, or biofuels) to conservation of biodiversity at the landscape scale?	yes	no	13	postdoc	Female	conservation	No	online.form
38	Ecosystem Management and Restoration	38. How can an understanding of factors affecting household decisions to invest in different naturalresource- based productive activities (e.g., agriculture, fishing, or hunting) be used to predict the biodiversity impacts of household responses to environmental change?	no	yes	13	postdoc	Female	conservation	No	online.form
39	Terrestrial Ecosystems	39. What are the impacts on biodiversity and ecosystem services of biofuel production and how will these vary by feedstock type, location, objective, and technology applied?	no	yes	13	postdoc	Female	conservation	No	online.form
40	Terrestrial Ecosystems	40. Under what conditions can agricultural intensification contribute to conserving overall biodiversity by reducing pressure to convert natural ecosystems?	yes	no	13	postdoc	Female	conservation	No	online.form
41	Terrestrial Ecosystems	41. What are the impacts (on and off site) on agricultural returns and biodiversity of “biodiversity-friendly” agricultural practices, such as organic, minimum tillage, and agroenvironment schemes?	no	yes	13	postdoc	Female	conservation	No	online.form
42	Terrestrial Ecosystems	42. Under what circumstances can afforestation, reforestation, and reduced emissions from deforestation and degradation (REDD) benefit biodiversity conservation, reduce emissions, and provide sustainable livelihoods?	no	yes	13	postdoc	Female	conservation	No	online.form
43	Terrestrial Ecosystems	43. How do different forms of forest governance influence biodiversity conservation outcomes and the implementation of REDD?	no	yes	13	postdoc	Female	conservation	No	online.form
44	Terrestrial Ecosystems	44. How are arid and semiarid ecosystems affected by the interaction of multiple stressors such as grazing by domestic livestock, soil erosion, and drought?	no	yes	13	postdoc	Female	conservation	No	online.form
45	Terrestrial Ecosystems	45. What are the contributions of urban nature reserves and other green amenity spaces, such as golf courses, to biodiversity conservation, and how can these be enhanced?	yes	no	13	postdoc	Female	conservation	No	online.form
46	Marine Ecosystems	46. How will ocean acidification affect marine biodiversity and ecosystem function, and what measures could mitigate these effects?	yes	yes	13	postdoc	Female	conservation	No	online.form
47	Marine Ecosystems	47. What are the ecological, social, and economic impacts resulting from the expansion of freshwater and marine aquaculture?	yes	yes	13	postdoc	Female	conservation	No	online.form
48	Marine Ecosystems	48. Which management actions are most effective for ensuring the long-term survival of coral reefs in response to the combined impacts of climate change and other existing stressors?	no	no	13	postdoc	Female	conservation	No	online.form
49	Marine Ecosystems	49. Which management approaches to fisheries are most effective at mitigating the impacts of fish extraction and fishing gear on nontarget species and their habitats?	no	yes	13	postdoc	Female	conservation	No	online.form
50	Marine Ecosystems	50. How does the effectiveness of marine protected areas vary with biological, physical, and social factors and with connectivity to other protected areas?	no	no	13	postdoc	Female	conservation	No	online.form
51	Marine Ecosystems	51. What will be the impacts of climate change on phytoplankton and oceanic productivity, and what will be the feedbacks of these impacts on the climate?	no	yes	13	postdoc	Female	conservation	No	online.form
52	Marine Ecosystems	52. How will multiple stressors, especially fishing, pollution, sea temperature fluctuations, acidification, and diseases, interact to affect marine ecosystems?	yes	yes	13	postdoc	Female	conservation	No	online.form
53	Marine Ecosystems	53. Which mechanisms are most effective at conserving biodiversity in ocean areas occurring outside the legal jurisdiction of any single country?	no	yes	13	postdoc	Female	conservation	No	online.form
54	Freshwater Ecosystems	54. How can freshwater biodiversity and ecosystem service values best be incorporated in the design of water-provisioning schemes for direct human use and food production?	yes	yes	13	postdoc	Female	conservation	No	online.form
55	Freshwater Ecosystems	55. Which aquatic species and communities are most vulnerable to human impacts, and how would their degradation affect the provision of ecosystem services?	yes	yes	13	postdoc	Female	conservation	No	online.form
56	Freshwater Ecosystems	56. Where will the impacts of global climate change on hydrology be most extreme, and how might they affect freshwater species and the ability of wetlands and inland waters to deliver ecosystem services?	no	yes	13	postdoc	Female	conservation	No	online.form
57	Freshwater Ecosystems	57. Which multinational governance, cross-sector cooperation arrangements, and finance mechanisms will make freshwater ecosystem management more effective and reduce international conflicts over water?	yes	no	13	postdoc	Female	conservation	No	online.form
58	Freshwater Ecosystems	58. How does investment in restoration of wetlands and riparian areas compare with construction of dams and flood defenses in providing cost-effective improvements in flood management and the storage and retention of water for domestic, industrial, and agricultural use?	yes	yes	13	postdoc	Female	conservation	No	online.form
59	Species Management	59. Under what conditions is trade in captive or wildharvested species beneficial for wild populations of the traded species?	yes	yes	13	postdoc	Female	conservation	No	online.form
60	Species Management	60. What information is required to enable responsible authorities to decide when and how to manage nonnative species?	no	no	13	postdoc	Female	conservation	No	online.form
61	Species Management	61. What is the relative effectiveness of different methods for facilitating movement of a species among disjunct patches of its habitat?	yes	yes	13	postdoc	Female	conservation	No	online.form
62	Species Management	62. What is the cost-effectiveness of different contributions to species conservation programs such as education, captive breeding, and habitat management?	no	yes	13	postdoc	Female	conservation	No	online.form
63	Species Management	63. What are the ecosystem impacts of efforts to conserve charismatic, flagship, or umbrella species?	yes	yes	13	postdoc	Female	conservation	No	online.form
64	Species Management	64. What are the likely risks, costs, and benefits of reintroducing and translocating species as a response to climate change?	no	yes	13	postdoc	Female	conservation	No	online.form
65	Species Management	65. What are the most effective approaches for reversing range and population collapse in top predators, large herbivores, and other species that exert disproportionate effects on ecosystem structure and function?	yes	yes	13	postdoc	Female	conservation	No	online.form
66	Species Management	66. How can we best manage diseases that have the potential to move among wild species, domestic species, and people?	yes	yes	13	postdoc	Female	conservation	No	online.form
67	Organizational Systems and Processes	67. How do the characteristics of the organizations (e.g., government vs. nongovernment) and their funding (e.g., amount and duration of funds) shape the effectiveness of conservation interventions?	no	no	13	postdoc	Female	conservation	No	online.form
68	Organizational Systems and Processes	68. What factors affect the extent to which practitioners integrate consideration of human needs and preferences into policy and practice?	yes	no	13	postdoc	Female	conservation	No	online.form
69	Organizational Systems and Processes	69. What is the cost-effectiveness of different approaches for rapidly expanding professional conservation capacity, and how does this vary with circumstances and among countries?	yes	yes	13	postdoc	Female	conservation	No	online.form
70	Organizational Systems and Processes	70. What is the effectiveness of the different mechanisms used to foster the evaluation and dissemination of conservation interventions?	no	no	13	postdoc	Female	conservation	No	online.form
71	Organizational Systems and Processes	71. How effective are the different strategies devised to integrate scientific knowledge into conservation policy and practice?	yes	yes	13	postdoc	Female	conservation	No	online.form
72	Organizational Systems and Processes	72. How effective are the different mechanisms used to promote data sharing and collaboration among individuals, conservationists, and conservation organizations?	no	yes	13	postdoc	Female	conservation	No	online.form
73	Societal Context and Change	73. What are the impacts on biodiversity of shifting patterns and trends in human demography, economic activity, consumption, and technology?	no	no	13	postdoc	Female	conservation	No	online.form
74	Societal Context and Change	74. How does the relationship between economic growth and biodiversity vary across scales, among different types of ecosystems, and with the type of economic activity?	yes	yes	13	postdoc	Female	conservation	No	online.form
75	Societal Context and Change	75. What are the direct and indirect impacts of armed conflict on biodiversity?	yes	yes	13	postdoc	Female	conservation	No	online.form
76	Societal Context and Change	76. What are the biodiversity impacts of changes in energy prices?	yes	yes	13	postdoc	Female	conservation	No	online.form
77	Societal Context and Change	77. How do resource tenure systems shape conservation outcomes in different social and ecological contexts?	yes	yes	13	postdoc	Female	conservation	No	online.form
78	Societal Context and Change	78. What are the impacts of international trade agreements and related policy instruments on biodiversity?	no	no	13	postdoc	Female	conservation	No	online.form
79	Societal Context and Change	79. How do economic subsidies affect biodiversity within the recipient country and elsewhere?	no	no	13	postdoc	Female	conservation	No	online.form
80	Societal Context and Change	80. How does corruption influence the effectiveness of conservation, and what are the most effective ways of preventing negative consequences?	yes	yes	13	postdoc	Female	conservation	No	online.form
81	Societal Context and Change	81. What are the conservation impacts of improved access to education, employment, and reproductive choice?	no	yes	13	postdoc	Female	conservation	No	online.form
82	Societal Context and Change	82. What is the relationship between individuals learning about environmental problems and their conservation attitudes, knowledge, beliefs, and behaviors?	yes	yes	13	postdoc	Female	conservation	No	online.form
83	Societal Context and Change	83. What are the impacts of increasing human dissociation from nature on the conservation of biodiversity?	no	no	13	postdoc	Female	conservation	No	online.form
84	Societal Context and Change	84. What are the effects of changes in human patterns of food consumption on biodiversity (e.g., shift from bushmeat to domestic meat and from fish to plantbased protein), and how are such human patterns of food consumption shaped by education programs, financial incentives, and other policy instruments?	no	no	13	postdoc	Female	conservation	No	online.form
85	Societal Context and Change	85. What factors shape human (in)tolerance of the presence and activities ofwild animals, especially where those animals induce human–wildlife conflict?	no	no	13	postdoc	Female	conservation	No	online.form
86	Impacts of Conservation Interventions	86. What have been the impacts on biodiversity of the Convention on Biological Diversity 2010 targets, and what objectives, mechanism, time frame, and means of measurement would be most effective for future targets?	yes	yes	13	postdoc	Female	conservation	No	online.form
87	Impacts of Conservation Interventions	87. How do different values (e.g., use vs. preservation) and the framing of these values (e.g., ecosystem services vs. species) motivate policy makers to assign public resources to conservation programs and policies?	yes	no	13	postdoc	Female	conservation	No	online.form
88	Impacts of Conservation Interventions	88. What factors shape individual and state compliance with local, national, and international conservation regimes?	yes	yes	13	postdoc	Female	conservation	No	online.form
89	Impacts of Conservation Interventions	89. What are the consequences of investment in improving knowledge (e.g., status, nature of threat, and effectiveness of interventions) versus expenditure on conservation action, and how does this differ among conservation issues?	no	no	13	postdoc	Female	conservation	No	online.form
90	Impacts of Conservation Interventions	90. What are the impacts on biodiversity and human well-being of differing approaches to devolving the responsibility for natural resource management?	no	no	13	postdoc	Female	conservation	No	online.form
91	Impacts of Conservation Interventions	91. What are the impacts of different conservation incentive programs on biodiversity and human wellbeing?	yes	no	13	postdoc	Female	conservation	No	online.form
92	Impacts of Conservation Interventions	92. How does public involvement, especially of marginalized groups, in conservation decision making shape the effectiveness of conservation interventions?	yes	no	13	postdoc	Female	conservation	No	online.form
93	Impacts of Conservation Interventions	93. What are the impacts of free, prior, and informed consent policies on the emergence, evolution, and performance of conservation interventions?	no	yes	13	postdoc	Female	conservation	No	online.form
94	Impacts of Conservation Interventions	94. How does providing information to resource users affect individual behavior and support for collective restrictions, and how does the effect vary with different means of providing the information?	no	no	13	postdoc	Female	conservation	No	online.form
95	Impacts of Conservation Interventions	95. What are the conservation impacts of corporate social responsibility regimes that are biodiversityoriented?	yes	no	13	postdoc	Female	conservation	No	online.form
96	Impacts of Conservation Interventions	96. What are the social impacts of conservation interventions, and how and why do these impacts vary among social groups (e.g., elites, poor, women, and indigenous)?	no	yes	13	postdoc	Female	conservation	No	online.form
97	Impacts of Conservation Interventions	97. What factors shape the likelihood and extent of formal recognition of customary rights and traditional institutions as the basis for conservation policy and practices, and what are the impacts of this formal recognition on conservation outcomes?	yes	no	13	postdoc	Female	conservation	No	online.form
98	Impacts of Conservation Interventions	98. What are the most cost-effectivemeans of encouraging broad, long-lasting, and active societal support and action for conservation in different contexts and among different actors?	yes	no	13	postdoc	Female	conservation	No	online.form
99	Impacts of Conservation Interventions	99. What has been the effect of environmental impact assessments on biodiversity conservation?	yes	no	13	postdoc	Female	conservation	No	online.form
100	Impacts of Conservation Interventions	100. What mechanisms best promote the use of local ideas and knowledge in conservation programs in ways that enhance biodiversity outcomes?	no	no	13	postdoc	Female	conservation	No	online.form
1	Ecosystem Function and Services	Do critical thresholds exist at which the loss of species diversity, or the loss of particular species, disrupts ecosystem functions and services, and how can these thresholds be predicted?	yes	yes	14	student	Female	palaeo	Yes	online.form
2	Ecosystem Function and Services	What is the effectiveness of different methods for the assessment of ecosystem services?	no	yes	14	student	Female	palaeo	Yes	online.form
3	Ecosystem Function and Services	How can biodiversity considerations be integrated into economic policies to reflect the monetary and nonmonetary value of biodiversity, ecosystem processes, goods, and services?	yes	yes	14	student	Female	palaeo	Yes	online.form
4	Ecosystem Function and Services	How can ecosystems be managed to increase protection of humans and biodiversity from extreme events?	yes	yes	14	student	Female	palaeo	Yes	online.form
5	Ecosystem Function and Services	How, where, and when has biodiversity loss affected human welfare?	yes	yes	14	student	Female	palaeo	Yes	online.form
6	Ecosystem Function and Services	What strategies for distributing the material benefits derived from biodiversity most effectively foster environmental stewardship and biodiversity conservation?	no	yes	14	student	Female	palaeo	Yes	online.form
7	Ecosystem Function and Services	How can protected area networks be designed to increase carbon storage benefits and mitigate climate impacts, with these benefits as incentives to support conservation actions?	yes	yes	14	student	Female	palaeo	Yes	online.form
8	Ecosystem Function and Services	How does soil biodiversity contribute to the extent and persistence of ecosystem services, including agricultural productivity?	no	yes	14	student	Female	palaeo	Yes	online.form
9	Climate Change	9. What impact will the melting of polar ice and a reduction in permafrost have on the human use of high-latitude ecosystems, and how will these changes in human use affect biodiversity?	no	yes	14	student	Female	palaeo	Yes	online.form
10	Climate Change	10. Which elements of biodiversity in which locations are most vulnerable to climate change, including extreme events?	yes	yes	14	student	Female	palaeo	Yes	online.form
11	Climate Change	11. How is the resilience of ecosystems to climate change affected by human activities and interventions?	no	yes	14	student	Female	palaeo	Yes	online.form
12	Climate Change	12. What factors determine the rates at which coastal ecosystems can respond to sea-level rise, and which of these are amenable to management?	yes	yes	14	student	Female	palaeo	Yes	online.form
13	Climate Change	13. How will climate change, together with other environmental stressors, alter the distribution and prevalence of diseases of wild species?	no	yes	14	student	Female	palaeo	Yes	online.form
14	Climate Change	14. How will human responses to climate change (e.g., changes in agriculture, resource conflicts, and migration) affect biodiversity?	no	yes	14	student	Female	palaeo	Yes	online.form
15	Climate Change	15. How might biodiversity policies and management practices be modified and implemented to accommodate climate change?	no	yes	14	student	Female	palaeo	Yes	online.form
16	Climate Change	16. How might emerging carbon markets affect biodiversity through their impacts on the protection, management, and creation of habitats?	no	yes	14	student	Female	palaeo	Yes	online.form
17	Climate Change	17. What are the potential effects of feedbacks between climate change and ecosystem dynamics (e.g., drought, forest dieback, and coral bleaching) on the effectiveness of policy measures to sequester carbon and protect biodiversity?	no	yes	14	student	Female	palaeo	Yes	online.form
18	Climate Change	18. How much carbon is sequestered by different ecosystems, including their soils, and how can these ecosystems be managed to contribute most effectively to the mitigation of climate change?	yes	yes	14	student	Female	palaeo	Yes	online.form
19	Climate Change	19. How, where, and to what extent can natural and seminatural ecosystems contribute to climate change adaptation and mitigation?	yes	yes	14	student	Female	palaeo	Yes	online.form
20	Climate Change	20. How will climate change affect the distribution and impacts of climate-dependent disturbance regimes, such as fire?	yes	yes	14	student	Female	palaeo	Yes	online.form
21	Climate Change	21. How will climate change affect global food production, and what are the resulting consequences for ecosystems and agrobiodiversity?	no	yes	14	student	Female	palaeo	Yes	online.form
22	Climate Change	22. How does biodiversity shape social resilience to the effects of climate change?	no	no	14	student	Female	palaeo	Yes	online.form
23	Technological Change	23. How might nanotechnology have positive or negative impacts on biodiversity conservation?	no	yes	14	student	Female	palaeo	Yes	online.form
24	Technological Change	24. How do the type, location, and associated mitigation measures of renewable energy technologies affect biodiversity?	no	yes	14	student	Female	palaeo	Yes	online.form
25	Technological Change	25. What are the direct and indirect impacts of genetically modified organisms on biodiversity?	no	yes	14	student	Female	palaeo	Yes	online.form
26	Technological Change	26. What are the implications for land use and biodiversity of the new and emerging “bioeconomy” markets (crops for pharmaceuticals, plastics, adhesives, etc.)?	no	no	14	student	Female	palaeo	Yes	online.form
27	Protected Areas	27. How effective are different types of protected areas (e.g., strict nature reserves, hunting reserves, and national parks) at conserving biodiversity and providing ecosystem services?	no	yes	14	student	Female	palaeo	Yes	online.form
28	Protected Areas	28. What is the management cost per hectare required to manage protected areas effectively, and how does this vary with management category, geography, and threat?	no	no	14	student	Female	palaeo	Yes	online.form
29	Protected Areas	29. What are the human well-being costs and benefits of protected areas, how are these distributed, and how do they vary with governance, resource tenure arrangements, and site characteristics?	no	no	14	student	Female	palaeo	Yes	online.form
30	Protected Areas	30. How does the management of protected areas affect conservation beyond the boundaries of the protected area, such as through the displacement of human populations, hunting, or fishing?	no	yes	14	student	Female	palaeo	Yes	online.form
31	Ecosystem Management and Restoration	31. What is the trade-off for biodiversity between balancing production of natural resources from intensive management systems, such as plantation forestry and aquaculture, versus harvesting those resources from more natural ecosystems?	no	yes	14	student	Female	palaeo	Yes	online.form
32	Ecosystem Management and Restoration	32. What was the condition of ecosystems before significant human disruption, and how can this knowledge be used to improve current and future management?	yes	yes	14	student	Female	palaeo	Yes	online.form
33	Ecosystem Management and Restoration	33. What, and where, are the significant opportunities for large-scale ecosystem restoration that benefits biodiversity and human well-being?	no	yes	14	student	Female	palaeo	Yes	online.form
34	Ecosystem Management and Restoration	34. How can ecosystem management systems be designed to better emulate natural processes, notably natural disturbance regimes, and to what extent does this improve conservation effectiveness?	yes	yes	14	student	Female	palaeo	Yes	online.form
35	Ecosystem Management and Restoration	35. To what extent, and under what conditions, does the integration of marine, terrestrial, and freshwater ecosystems within conservation plans yield better outcomes than plans based on single realms?	no	yes	14	student	Female	palaeo	Yes	online.form
36	Ecosystem Management and Restoration	36. What spatial pattern of human settlement (e.g., clustered vs. dispersed) has the least impact on biodiversity?	no	yes	14	student	Female	palaeo	Yes	online.form
37	Ecosystem Management and Restoration	37. What is the contribution of areas that are intensively managed for production of commodities (such as food, timber, or biofuels) to conservation of biodiversity at the landscape scale?	no	yes	14	student	Female	palaeo	Yes	online.form
38	Ecosystem Management and Restoration	38. How can an understanding of factors affecting household decisions to invest in different naturalresource- based productive activities (e.g., agriculture, fishing, or hunting) be used to predict the biodiversity impacts of household responses to environmental change?	no	yes	14	student	Female	palaeo	Yes	online.form
39	Terrestrial Ecosystems	39. What are the impacts on biodiversity and ecosystem services of biofuel production and how will these vary by feedstock type, location, objective, and technology applied?	no	yes	14	student	Female	palaeo	Yes	online.form
40	Terrestrial Ecosystems	40. Under what conditions can agricultural intensification contribute to conserving overall biodiversity by reducing pressure to convert natural ecosystems?	no	yes	14	student	Female	palaeo	Yes	online.form
41	Terrestrial Ecosystems	41. What are the impacts (on and off site) on agricultural returns and biodiversity of “biodiversity-friendly” agricultural practices, such as organic, minimum tillage, and agroenvironment schemes?	no	yes	14	student	Female	palaeo	Yes	online.form
42	Terrestrial Ecosystems	42. Under what circumstances can afforestation, reforestation, and reduced emissions from deforestation and degradation (REDD) benefit biodiversity conservation, reduce emissions, and provide sustainable livelihoods?	no	yes	14	student	Female	palaeo	Yes	online.form
43	Terrestrial Ecosystems	43. How do different forms of forest governance influence biodiversity conservation outcomes and the implementation of REDD?	no	yes	14	student	Female	palaeo	Yes	online.form
44	Terrestrial Ecosystems	44. How are arid and semiarid ecosystems affected by the interaction of multiple stressors such as grazing by domestic livestock, soil erosion, and drought?	yes	yes	14	student	Female	palaeo	Yes	online.form
45	Terrestrial Ecosystems	45. What are the contributions of urban nature reserves and other green amenity spaces, such as golf courses, to biodiversity conservation, and how can these be enhanced?	no	yes	14	student	Female	palaeo	Yes	online.form
46	Marine Ecosystems	46. How will ocean acidification affect marine biodiversity and ecosystem function, and what measures could mitigate these effects?	yes	yes	14	student	Female	palaeo	Yes	online.form
47	Marine Ecosystems	47. What are the ecological, social, and economic impacts resulting from the expansion of freshwater and marine aquaculture?	no	yes	14	student	Female	palaeo	Yes	online.form
48	Marine Ecosystems	48. Which management actions are most effective for ensuring the long-term survival of coral reefs in response to the combined impacts of climate change and other existing stressors?	no	yes	14	student	Female	palaeo	Yes	online.form
49	Marine Ecosystems	49. Which management approaches to fisheries are most effective at mitigating the impacts of fish extraction and fishing gear on nontarget species and their habitats?	no	yes	14	student	Female	palaeo	Yes	online.form
50	Marine Ecosystems	50. How does the effectiveness of marine protected areas vary with biological, physical, and social factors and with connectivity to other protected areas?	no	yes	14	student	Female	palaeo	Yes	online.form
51	Marine Ecosystems	51. What will be the impacts of climate change on phytoplankton and oceanic productivity, and what will be the feedbacks of these impacts on the climate?	yes	yes	14	student	Female	palaeo	Yes	online.form
52	Marine Ecosystems	52. How will multiple stressors, especially fishing, pollution, sea temperature fluctuations, acidification, and diseases, interact to affect marine ecosystems?	yes	yes	14	student	Female	palaeo	Yes	online.form
53	Marine Ecosystems	53. Which mechanisms are most effective at conserving biodiversity in ocean areas occurring outside the legal jurisdiction of any single country?	no	yes	14	student	Female	palaeo	Yes	online.form
54	Freshwater Ecosystems	54. How can freshwater biodiversity and ecosystem service values best be incorporated in the design of water-provisioning schemes for direct human use and food production?	no	yes	14	student	Female	palaeo	Yes	online.form
55	Freshwater Ecosystems	55. Which aquatic species and communities are most vulnerable to human impacts, and how would their degradation affect the provision of ecosystem services?	yes	yes	14	student	Female	palaeo	Yes	online.form
56	Freshwater Ecosystems	56. Where will the impacts of global climate change on hydrology be most extreme, and how might they affect freshwater species and the ability of wetlands and inland waters to deliver ecosystem services?	yes	yes	14	student	Female	palaeo	Yes	online.form
57	Freshwater Ecosystems	57. Which multinational governance, cross-sector cooperation arrangements, and finance mechanisms will make freshwater ecosystem management more effective and reduce international conflicts over water?	no	no	14	student	Female	palaeo	Yes	online.form
58	Freshwater Ecosystems	58. How does investment in restoration of wetlands and riparian areas compare with construction of dams and flood defenses in providing cost-effective improvements in flood management and the storage and retention of water for domestic, industrial, and agricultural use?	no	yes	14	student	Female	palaeo	Yes	online.form
59	Species Management	59. Under what conditions is trade in captive or wildharvested species beneficial for wild populations of the traded species?	no	yes	14	student	Female	palaeo	Yes	online.form
60	Species Management	60. What information is required to enable responsible authorities to decide when and how to manage nonnative species?	yes	yes	14	student	Female	palaeo	Yes	online.form
61	Species Management	61. What is the relative effectiveness of different methods for facilitating movement of a species among disjunct patches of its habitat?	yes	yes	14	student	Female	palaeo	Yes	online.form
62	Species Management	62. What is the cost-effectiveness of different contributions to species conservation programs such as education, captive breeding, and habitat management?	no	no	14	student	Female	palaeo	Yes	online.form
63	Species Management	63. What are the ecosystem impacts of efforts to conserve charismatic, flagship, or umbrella species?	no	yes	14	student	Female	palaeo	Yes	online.form
64	Species Management	64. What are the likely risks, costs, and benefits of reintroducing and translocating species as a response to climate change?	no	yes	14	student	Female	palaeo	Yes	online.form
65	Species Management	65. What are the most effective approaches for reversing range and population collapse in top predators, large herbivores, and other species that exert disproportionate effects on ecosystem structure and function?	no	yes	14	student	Female	palaeo	Yes	online.form
66	Species Management	66. How can we best manage diseases that have the potential to move among wild species, domestic species, and people?	no	yes	14	student	Female	palaeo	Yes	online.form
67	Organizational Systems and Processes	67. How do the characteristics of the organizations (e.g., government vs. nongovernment) and their funding (e.g., amount and duration of funds) shape the effectiveness of conservation interventions?	no	no	14	student	Female	palaeo	Yes	online.form
68	Organizational Systems and Processes	68. What factors affect the extent to which practitioners integrate consideration of human needs and preferences into policy and practice?	no	no	14	student	Female	palaeo	Yes	online.form
69	Organizational Systems and Processes	69. What is the cost-effectiveness of different approaches for rapidly expanding professional conservation capacity, and how does this vary with circumstances and among countries?	no	no	14	student	Female	palaeo	Yes	online.form
70	Organizational Systems and Processes	70. What is the effectiveness of the different mechanisms used to foster the evaluation and dissemination of conservation interventions?	no	yes	14	student	Female	palaeo	Yes	online.form
71	Organizational Systems and Processes	71. How effective are the different strategies devised to integrate scientific knowledge into conservation policy and practice?	yes	yes	14	student	Female	palaeo	Yes	online.form
72	Organizational Systems and Processes	72. How effective are the different mechanisms used to promote data sharing and collaboration among individuals, conservationists, and conservation organizations?	no	no	14	student	Female	palaeo	Yes	online.form
73	Societal Context and Change	73. What are the impacts on biodiversity of shifting patterns and trends in human demography, economic activity, consumption, and technology?	no	yes	14	student	Female	palaeo	Yes	online.form
74	Societal Context and Change	74. How does the relationship between economic growth and biodiversity vary across scales, among different types of ecosystems, and with the type of economic activity?	no	yes	14	student	Female	palaeo	Yes	online.form
75	Societal Context and Change	75. What are the direct and indirect impacts of armed conflict on biodiversity?	no	yes	14	student	Female	palaeo	Yes	online.form
76	Societal Context and Change	76. What are the biodiversity impacts of changes in energy prices?	no	yes	14	student	Female	palaeo	Yes	online.form
77	Societal Context and Change	77. How do resource tenure systems shape conservation outcomes in different social and ecological contexts?	no	yes	14	student	Female	palaeo	Yes	online.form
78	Societal Context and Change	78. What are the impacts of international trade agreements and related policy instruments on biodiversity?	no	yes	14	student	Female	palaeo	Yes	online.form
79	Societal Context and Change	79. How do economic subsidies affect biodiversity within the recipient country and elsewhere?	no	yes	14	student	Female	palaeo	Yes	online.form
80	Societal Context and Change	80. How does corruption influence the effectiveness of conservation, and what are the most effective ways of preventing negative consequences?	no	no	14	student	Female	palaeo	Yes	online.form
81	Societal Context and Change	81. What are the conservation impacts of improved access to education, employment, and reproductive choice?	no	yes	14	student	Female	palaeo	Yes	online.form
82	Societal Context and Change	82. What is the relationship between individuals learning about environmental problems and their conservation attitudes, knowledge, beliefs, and behaviors?	no	no	14	student	Female	palaeo	Yes	online.form
83	Societal Context and Change	83. What are the impacts of increasing human dissociation from nature on the conservation of biodiversity?	no	yes	14	student	Female	palaeo	Yes	online.form
84	Societal Context and Change	84. What are the effects of changes in human patterns of food consumption on biodiversity (e.g., shift from bushmeat to domestic meat and from fish to plantbased protein), and how are such human patterns of food consumption shaped by education programs, financial incentives, and other policy instruments?	no	yes	14	student	Female	palaeo	Yes	online.form
85	Societal Context and Change	85. What factors shape human (in)tolerance of the presence and activities ofwild animals, especially where those animals induce human–wildlife conflict?	no	no	14	student	Female	palaeo	Yes	online.form
86	Impacts of Conservation Interventions	86. What have been the impacts on biodiversity of the Convention on Biological Diversity 2010 targets, and what objectives, mechanism, time frame, and means of measurement would be most effective for future targets?	no	yes	14	student	Female	palaeo	Yes	online.form
87	Impacts of Conservation Interventions	87. How do different values (e.g., use vs. preservation) and the framing of these values (e.g., ecosystem services vs. species) motivate policy makers to assign public resources to conservation programs and policies?	no	no	14	student	Female	palaeo	Yes	online.form
88	Impacts of Conservation Interventions	88. What factors shape individual and state compliance with local, national, and international conservation regimes?	no	no	14	student	Female	palaeo	Yes	online.form
89	Impacts of Conservation Interventions	89. What are the consequences of investment in improving knowledge (e.g., status, nature of threat, and effectiveness of interventions) versus expenditure on conservation action, and how does this differ among conservation issues?	no	no	14	student	Female	palaeo	Yes	online.form
90	Impacts of Conservation Interventions	90. What are the impacts on biodiversity and human well-being of differing approaches to devolving the responsibility for natural resource management?	no	yes	14	student	Female	palaeo	Yes	online.form
91	Impacts of Conservation Interventions	91. What are the impacts of different conservation incentive programs on biodiversity and human wellbeing?	no	yes	14	student	Female	palaeo	Yes	online.form
92	Impacts of Conservation Interventions	92. How does public involvement, especially of marginalized groups, in conservation decision making shape the effectiveness of conservation interventions?	no	no	14	student	Female	palaeo	Yes	online.form
93	Impacts of Conservation Interventions	93. What are the impacts of free, prior, and informed consent policies on the emergence, evolution, and performance of conservation interventions?	no	no	14	student	Female	palaeo	Yes	online.form
94	Impacts of Conservation Interventions	94. How does providing information to resource users affect individual behavior and support for collective restrictions, and how does the effect vary with different means of providing the information?	no	no	14	student	Female	palaeo	Yes	online.form
95	Impacts of Conservation Interventions	95. What are the conservation impacts of corporate social responsibility regimes that are biodiversityoriented?	no	yes	14	student	Female	palaeo	Yes	online.form
96	Impacts of Conservation Interventions	96. What are the social impacts of conservation interventions, and how and why do these impacts vary among social groups (e.g., elites, poor, women, and indigenous)?	no	no	14	student	Female	palaeo	Yes	online.form
97	Impacts of Conservation Interventions	97. What factors shape the likelihood and extent of formal recognition of customary rights and traditional institutions as the basis for conservation policy and practices, and what are the impacts of this formal recognition on conservation outcomes?	no	no	14	student	Female	palaeo	Yes	online.form
98	Impacts of Conservation Interventions	98. What are the most cost-effectivemeans of encouraging broad, long-lasting, and active societal support and action for conservation in different contexts and among different actors?	no	no	14	student	Female	palaeo	Yes	online.form
99	Impacts of Conservation Interventions	99. What has been the effect of environmental impact assessments on biodiversity conservation?	no	yes	14	student	Female	palaeo	Yes	online.form
100	Impacts of Conservation Interventions	100. What mechanisms best promote the use of local ideas and knowledge in conservation programs in ways that enhance biodiversity outcomes?	no	no	14	student	Female	palaeo	Yes	online.form
1	Ecosystem Function and Services	Do critical thresholds exist at which the loss of species diversity, or the loss of particular species, disrupts ecosystem functions and services, and how can these thresholds be predicted?	yes	yes	15	postdoc	Female	palaeo	Yes	online.form
2	Ecosystem Function and Services	What is the effectiveness of different methods for the assessment of ecosystem services?	yes	yes	15	postdoc	Female	palaeo	Yes	online.form
3	Ecosystem Function and Services	How can biodiversity considerations be integrated into economic policies to reflect the monetary and nonmonetary value of biodiversity, ecosystem processes, goods, and services?	no	yes	15	postdoc	Female	palaeo	Yes	online.form
4	Ecosystem Function and Services	How can ecosystems be managed to increase protection of humans and biodiversity from extreme events?	no	yes	15	postdoc	Female	palaeo	Yes	online.form
5	Ecosystem Function and Services	How, where, and when has biodiversity loss affected human welfare?	no	yes	15	postdoc	Female	palaeo	Yes	online.form
6	Ecosystem Function and Services	What strategies for distributing the material benefits derived from biodiversity most effectively foster environmental stewardship and biodiversity conservation?	yes	yes	15	postdoc	Female	palaeo	Yes	online.form
7	Ecosystem Function and Services	How can protected area networks be designed to increase carbon storage benefits and mitigate climate impacts, with these benefits as incentives to support conservation actions?	yes	yes	15	postdoc	Female	palaeo	Yes	online.form
8	Ecosystem Function and Services	How does soil biodiversity contribute to the extent and persistence of ecosystem services, including agricultural productivity?	yes	yes	15	postdoc	Female	palaeo	Yes	online.form
9	Climate Change	9. What impact will the melting of polar ice and a reduction in permafrost have on the human use of high-latitude ecosystems, and how will these changes in human use affect biodiversity?	no	yes	15	postdoc	Female	palaeo	Yes	online.form
10	Climate Change	10. Which elements of biodiversity in which locations are most vulnerable to climate change, including extreme events?	yes	yes	15	postdoc	Female	palaeo	Yes	online.form
11	Climate Change	11. How is the resilience of ecosystems to climate change affected by human activities and interventions?	yes	yes	15	postdoc	Female	palaeo	Yes	online.form
12	Climate Change	12. What factors determine the rates at which coastal ecosystems can respond to sea-level rise, and which of these are amenable to management?	yes	yes	15	postdoc	Female	palaeo	Yes	online.form
13	Climate Change	13. How will climate change, together with other environmental stressors, alter the distribution and prevalence of diseases of wild species?	no	yes	15	postdoc	Female	palaeo	Yes	online.form
14	Climate Change	14. How will human responses to climate change (e.g., changes in agriculture, resource conflicts, and migration) affect biodiversity?	no	yes	15	postdoc	Female	palaeo	Yes	online.form
15	Climate Change	15. How might biodiversity policies and management practices be modified and implemented to accommodate climate change?	no	yes	15	postdoc	Female	palaeo	Yes	online.form
16	Climate Change	16. How might emerging carbon markets affect biodiversity through their impacts on the protection, management, and creation of habitats?	yes	yes	15	postdoc	Female	palaeo	Yes	online.form
17	Climate Change	17. What are the potential effects of feedbacks between climate change and ecosystem dynamics (e.g., drought, forest dieback, and coral bleaching) on the effectiveness of policy measures to sequester carbon and protect biodiversity?	yes	yes	15	postdoc	Female	palaeo	Yes	online.form
18	Climate Change	18. How much carbon is sequestered by different ecosystems, including their soils, and how can these ecosystems be managed to contribute most effectively to the mitigation of climate change?	yes	yes	15	postdoc	Female	palaeo	Yes	online.form
19	Climate Change	19. How, where, and to what extent can natural and seminatural ecosystems contribute to climate change adaptation and mitigation?	yes	yes	15	postdoc	Female	palaeo	Yes	online.form
20	Climate Change	20. How will climate change affect the distribution and impacts of climate-dependent disturbance regimes, such as fire?	yes	yes	15	postdoc	Female	palaeo	Yes	online.form
21	Climate Change	21. How will climate change affect global food production, and what are the resulting consequences for ecosystems and agrobiodiversity?	no	yes	15	postdoc	Female	palaeo	Yes	online.form
22	Climate Change	22. How does biodiversity shape social resilience to the effects of climate change?	yes	yes	15	postdoc	Female	palaeo	Yes	online.form
23	Technological Change	23. How might nanotechnology have positive or negative impacts on biodiversity conservation?	no	no	15	postdoc	Female	palaeo	Yes	online.form
24	Technological Change	24. How do the type, location, and associated mitigation measures of renewable energy technologies affect biodiversity?	no	no	15	postdoc	Female	palaeo	Yes	online.form
25	Technological Change	25. What are the direct and indirect impacts of genetically modified organisms on biodiversity?	no	no	15	postdoc	Female	palaeo	Yes	online.form
26	Technological Change	26. What are the implications for land use and biodiversity of the new and emerging “bioeconomy” markets (crops for pharmaceuticals, plastics, adhesives, etc.)?	no	no	15	postdoc	Female	palaeo	Yes	online.form
27	Protected Areas	27. How effective are different types of protected areas (e.g., strict nature reserves, hunting reserves, and national parks) at conserving biodiversity and providing ecosystem services?	no	yes	15	postdoc	Female	palaeo	Yes	online.form
28	Protected Areas	28. What is the management cost per hectare required to manage protected areas effectively, and how does this vary with management category, geography, and threat?	no	yes	15	postdoc	Female	palaeo	Yes	online.form
29	Protected Areas	29. What are the human well-being costs and benefits of protected areas, how are these distributed, and how do they vary with governance, resource tenure arrangements, and site characteristics?	yes	yes	15	postdoc	Female	palaeo	Yes	online.form
30	Protected Areas	30. How does the management of protected areas affect conservation beyond the boundaries of the protected area, such as through the displacement of human populations, hunting, or fishing?	yes	yes	15	postdoc	Female	palaeo	Yes	online.form
31	Ecosystem Management and Restoration	31. What is the trade-off for biodiversity between balancing production of natural resources from intensive management systems, such as plantation forestry and aquaculture, versus harvesting those resources from more natural ecosystems?	yes	yes	15	postdoc	Female	palaeo	Yes	online.form
32	Ecosystem Management and Restoration	32. What was the condition of ecosystems before significant human disruption, and how can this knowledge be used to improve current and future management?	yes	yes	15	postdoc	Female	palaeo	Yes	online.form
33	Ecosystem Management and Restoration	33. What, and where, are the significant opportunities for large-scale ecosystem restoration that benefits biodiversity and human well-being?	yes	yes	15	postdoc	Female	palaeo	Yes	online.form
34	Ecosystem Management and Restoration	34. How can ecosystem management systems be designed to better emulate natural processes, notably natural disturbance regimes, and to what extent does this improve conservation effectiveness?	yes	yes	15	postdoc	Female	palaeo	Yes	online.form
35	Ecosystem Management and Restoration	35. To what extent, and under what conditions, does the integration of marine, terrestrial, and freshwater ecosystems within conservation plans yield better outcomes than plans based on single realms?	yes	yes	15	postdoc	Female	palaeo	Yes	online.form
36	Ecosystem Management and Restoration	36. What spatial pattern of human settlement (e.g., clustered vs. dispersed) has the least impact on biodiversity?	no	yes	15	postdoc	Female	palaeo	Yes	online.form
37	Ecosystem Management and Restoration	37. What is the contribution of areas that are intensively managed for production of commodities (such as food, timber, or biofuels) to conservation of biodiversity at the landscape scale?	no	yes	15	postdoc	Female	palaeo	Yes	online.form
38	Ecosystem Management and Restoration	38. How can an understanding of factors affecting household decisions to invest in different naturalresource- based productive activities (e.g., agriculture, fishing, or hunting) be used to predict the biodiversity impacts of household responses to environmental change?	no	no	15	postdoc	Female	palaeo	Yes	online.form
39	Terrestrial Ecosystems	39. What are the impacts on biodiversity and ecosystem services of biofuel production and how will these vary by feedstock type, location, objective, and technology applied?	no	yes	15	postdoc	Female	palaeo	Yes	online.form
40	Terrestrial Ecosystems	40. Under what conditions can agricultural intensification contribute to conserving overall biodiversity by reducing pressure to convert natural ecosystems?	yes	yes	15	postdoc	Female	palaeo	Yes	online.form
41	Terrestrial Ecosystems	41. What are the impacts (on and off site) on agricultural returns and biodiversity of “biodiversity-friendly” agricultural practices, such as organic, minimum tillage, and agroenvironment schemes?	no	no	15	postdoc	Female	palaeo	Yes	online.form
42	Terrestrial Ecosystems	42. Under what circumstances can afforestation, reforestation, and reduced emissions from deforestation and degradation (REDD) benefit biodiversity conservation, reduce emissions, and provide sustainable livelihoods?	yes	yes	15	postdoc	Female	palaeo	Yes	online.form
43	Terrestrial Ecosystems	43. How do different forms of forest governance influence biodiversity conservation outcomes and the implementation of REDD?	yes	yes	15	postdoc	Female	palaeo	Yes	online.form
44	Terrestrial Ecosystems	44. How are arid and semiarid ecosystems affected by the interaction of multiple stressors such as grazing by domestic livestock, soil erosion, and drought?	yes	yes	15	postdoc	Female	palaeo	Yes	online.form
45	Terrestrial Ecosystems	45. What are the contributions of urban nature reserves and other green amenity spaces, such as golf courses, to biodiversity conservation, and how can these be enhanced?	no	yes	15	postdoc	Female	palaeo	Yes	online.form
46	Marine Ecosystems	46. How will ocean acidification affect marine biodiversity and ecosystem function, and what measures could mitigate these effects?	yes	yes	15	postdoc	Female	palaeo	Yes	online.form
47	Marine Ecosystems	47. What are the ecological, social, and economic impacts resulting from the expansion of freshwater and marine aquaculture?	no	yes	15	postdoc	Female	palaeo	Yes	online.form
48	Marine Ecosystems	48. Which management actions are most effective for ensuring the long-term survival of coral reefs in response to the combined impacts of climate change and other existing stressors?	yes	yes	15	postdoc	Female	palaeo	Yes	online.form
49	Marine Ecosystems	49. Which management approaches to fisheries are most effective at mitigating the impacts of fish extraction and fishing gear on nontarget species and their habitats?	yes	yes	15	postdoc	Female	palaeo	Yes	online.form
50	Marine Ecosystems	50. How does the effectiveness of marine protected areas vary with biological, physical, and social factors and with connectivity to other protected areas?	no	yes	15	postdoc	Female	palaeo	Yes	online.form
51	Marine Ecosystems	51. What will be the impacts of climate change on phytoplankton and oceanic productivity, and what will be the feedbacks of these impacts on the climate?	yes	yes	15	postdoc	Female	palaeo	Yes	online.form
52	Marine Ecosystems	52. How will multiple stressors, especially fishing, pollution, sea temperature fluctuations, acidification, and diseases, interact to affect marine ecosystems?	yes	yes	15	postdoc	Female	palaeo	Yes	online.form
53	Marine Ecosystems	53. Which mechanisms are most effective at conserving biodiversity in ocean areas occurring outside the legal jurisdiction of any single country?	no	yes	15	postdoc	Female	palaeo	Yes	online.form
54	Freshwater Ecosystems	54. How can freshwater biodiversity and ecosystem service values best be incorporated in the design of water-provisioning schemes for direct human use and food production?	yes	yes	15	postdoc	Female	palaeo	Yes	online.form
55	Freshwater Ecosystems	55. Which aquatic species and communities are most vulnerable to human impacts, and how would their degradation affect the provision of ecosystem services?	no	yes	15	postdoc	Female	palaeo	Yes	online.form
56	Freshwater Ecosystems	56. Where will the impacts of global climate change on hydrology be most extreme, and how might they affect freshwater species and the ability of wetlands and inland waters to deliver ecosystem services?	yes	yes	15	postdoc	Female	palaeo	Yes	online.form
57	Freshwater Ecosystems	57. Which multinational governance, cross-sector cooperation arrangements, and finance mechanisms will make freshwater ecosystem management more effective and reduce international conflicts over water?	no	yes	15	postdoc	Female	palaeo	Yes	online.form
58	Freshwater Ecosystems	58. How does investment in restoration of wetlands and riparian areas compare with construction of dams and flood defenses in providing cost-effective improvements in flood management and the storage and retention of water for domestic, industrial, and agricultural use?	yes	yes	15	postdoc	Female	palaeo	Yes	online.form
59	Species Management	59. Under what conditions is trade in captive or wildharvested species beneficial for wild populations of the traded species?	no	yes	15	postdoc	Female	palaeo	Yes	online.form
60	Species Management	60. What information is required to enable responsible authorities to decide when and how to manage nonnative species?	yes	yes	15	postdoc	Female	palaeo	Yes	online.form
61	Species Management	61. What is the relative effectiveness of different methods for facilitating movement of a species among disjunct patches of its habitat?	yes	yes	15	postdoc	Female	palaeo	Yes	online.form
62	Species Management	62. What is the cost-effectiveness of different contributions to species conservation programs such as education, captive breeding, and habitat management?	no	no	15	postdoc	Female	palaeo	Yes	online.form
63	Species Management	63. What are the ecosystem impacts of efforts to conserve charismatic, flagship, or umbrella species?	no	yes	15	postdoc	Female	palaeo	Yes	online.form
64	Species Management	64. What are the likely risks, costs, and benefits of reintroducing and translocating species as a response to climate change?	yes	yes	15	postdoc	Female	palaeo	Yes	online.form
65	Species Management	65. What are the most effective approaches for reversing range and population collapse in top predators, large herbivores, and other species that exert disproportionate effects on ecosystem structure and function?	yes	yes	15	postdoc	Female	palaeo	Yes	online.form
66	Species Management	66. How can we best manage diseases that have the potential to move among wild species, domestic species, and people?	no	yes	15	postdoc	Female	palaeo	Yes	online.form
67	Organizational Systems and Processes	67. How do the characteristics of the organizations (e.g., government vs. nongovernment) and their funding (e.g., amount and duration of funds) shape the effectiveness of conservation interventions?	no	yes	15	postdoc	Female	palaeo	Yes	online.form
68	Organizational Systems and Processes	68. What factors affect the extent to which practitioners integrate consideration of human needs and preferences into policy and practice?	no	yes	15	postdoc	Female	palaeo	Yes	online.form
69	Organizational Systems and Processes	69. What is the cost-effectiveness of different approaches for rapidly expanding professional conservation capacity, and how does this vary with circumstances and among countries?	no	no	15	postdoc	Female	palaeo	Yes	online.form
70	Organizational Systems and Processes	70. What is the effectiveness of the different mechanisms used to foster the evaluation and dissemination of conservation interventions?	no	no	15	postdoc	Female	palaeo	Yes	online.form
71	Organizational Systems and Processes	71. How effective are the different strategies devised to integrate scientific knowledge into conservation policy and practice?	no	no	15	postdoc	Female	palaeo	Yes	online.form
72	Organizational Systems and Processes	72. How effective are the different mechanisms used to promote data sharing and collaboration among individuals, conservationists, and conservation organizations?	no	no	15	postdoc	Female	palaeo	Yes	online.form
73	Societal Context and Change	73. What are the impacts on biodiversity of shifting patterns and trends in human demography, economic activity, consumption, and technology?	no	yes	15	postdoc	Female	palaeo	Yes	online.form
74	Societal Context and Change	74. How does the relationship between economic growth and biodiversity vary across scales, among different types of ecosystems, and with the type of economic activity?	no	yes	15	postdoc	Female	palaeo	Yes	online.form
75	Societal Context and Change	75. What are the direct and indirect impacts of armed conflict on biodiversity?	no	yes	15	postdoc	Female	palaeo	Yes	online.form
76	Societal Context and Change	76. What are the biodiversity impacts of changes in energy prices?	no	yes	15	postdoc	Female	palaeo	Yes	online.form
77	Societal Context and Change	77. How do resource tenure systems shape conservation outcomes in different social and ecological contexts?	no	yes	15	postdoc	Female	palaeo	Yes	online.form
78	Societal Context and Change	78. What are the impacts of international trade agreements and related policy instruments on biodiversity?	no	no	15	postdoc	Female	palaeo	Yes	online.form
79	Societal Context and Change	79. How do economic subsidies affect biodiversity within the recipient country and elsewhere?	no	no	15	postdoc	Female	palaeo	Yes	online.form
80	Societal Context and Change	80. How does corruption influence the effectiveness of conservation, and what are the most effective ways of preventing negative consequences?	no	no	15	postdoc	Female	palaeo	Yes	online.form
81	Societal Context and Change	81. What are the conservation impacts of improved access to education, employment, and reproductive choice?	no	no	15	postdoc	Female	palaeo	Yes	online.form
82	Societal Context and Change	82. What is the relationship between individuals learning about environmental problems and their conservation attitudes, knowledge, beliefs, and behaviors?	no	no	15	postdoc	Female	palaeo	Yes	online.form
83	Societal Context and Change	83. What are the impacts of increasing human dissociation from nature on the conservation of biodiversity?	no	yes	15	postdoc	Female	palaeo	Yes	online.form
84	Societal Context and Change	84. What are the effects of changes in human patterns of food consumption on biodiversity (e.g., shift from bushmeat to domestic meat and from fish to plantbased protein), and how are such human patterns of food consumption shaped by education programs, financial incentives, and other policy instruments?	no	yes	15	postdoc	Female	palaeo	Yes	online.form
85	Societal Context and Change	85. What factors shape human (in)tolerance of the presence and activities ofwild animals, especially where those animals induce human–wildlife conflict?	no	yes	15	postdoc	Female	palaeo	Yes	online.form
86	Impacts of Conservation Interventions	86. What have been the impacts on biodiversity of the Convention on Biological Diversity 2010 targets, and what objectives, mechanism, time frame, and means of measurement would be most effective for future targets?	no	no	15	postdoc	Female	palaeo	Yes	online.form
87	Impacts of Conservation Interventions	87. How do different values (e.g., use vs. preservation) and the framing of these values (e.g., ecosystem services vs. species) motivate policy makers to assign public resources to conservation programs and policies?	no	yes	15	postdoc	Female	palaeo	Yes	online.form
88	Impacts of Conservation Interventions	88. What factors shape individual and state compliance with local, national, and international conservation regimes?	no	no	15	postdoc	Female	palaeo	Yes	online.form
89	Impacts of Conservation Interventions	89. What are the consequences of investment in improving knowledge (e.g., status, nature of threat, and effectiveness of interventions) versus expenditure on conservation action, and how does this differ among conservation issues?	no	no	15	postdoc	Female	palaeo	Yes	online.form
90	Impacts of Conservation Interventions	90. What are the impacts on biodiversity and human well-being of differing approaches to devolving the responsibility for natural resource management?	no	yes	15	postdoc	Female	palaeo	Yes	online.form
91	Impacts of Conservation Interventions	91. What are the impacts of different conservation incentive programs on biodiversity and human wellbeing?	no	no	15	postdoc	Female	palaeo	Yes	online.form
92	Impacts of Conservation Interventions	92. How does public involvement, especially of marginalized groups, in conservation decision making shape the effectiveness of conservation interventions?	no	no	15	postdoc	Female	palaeo	Yes	online.form
93	Impacts of Conservation Interventions	93. What are the impacts of free, prior, and informed consent policies on the emergence, evolution, and performance of conservation interventions?	no	no	15	postdoc	Female	palaeo	Yes	online.form
94	Impacts of Conservation Interventions	94. How does providing information to resource users affect individual behavior and support for collective restrictions, and how does the effect vary with different means of providing the information?	no	no	15	postdoc	Female	palaeo	Yes	online.form
95	Impacts of Conservation Interventions	95. What are the conservation impacts of corporate social responsibility regimes that are biodiversityoriented?	no	no	15	postdoc	Female	palaeo	Yes	online.form
96	Impacts of Conservation Interventions	96. What are the social impacts of conservation interventions, and how and why do these impacts vary among social groups (e.g., elites, poor, women, and indigenous)?	no	no	15	postdoc	Female	palaeo	Yes	online.form
97	Impacts of Conservation Interventions	97. What factors shape the likelihood and extent of formal recognition of customary rights and traditional institutions as the basis for conservation policy and practices, and what are the impacts of this formal recognition on conservation outcomes?	no	no	15	postdoc	Female	palaeo	Yes	online.form
98	Impacts of Conservation Interventions	98. What are the most cost-effectivemeans of encouraging broad, long-lasting, and active societal support and action for conservation in different contexts and among different actors?	no	no	15	postdoc	Female	palaeo	Yes	online.form
99	Impacts of Conservation Interventions	99. What has been the effect of environmental impact assessments on biodiversity conservation?	no	no	15	postdoc	Female	palaeo	Yes	online.form
100	Impacts of Conservation Interventions	100. What mechanisms best promote the use of local ideas and knowledge in conservation programs in ways that enhance biodiversity outcomes?	no	yes	15	postdoc	Female	palaeo	Yes	online.form
1	Ecosystem Function and Services	Do critical thresholds exist at which the loss of species diversity, or the loss of particular species, disrupts ecosystem functions and services, and how can these thresholds be predicted?	yes	no	16	student	Female	palaeo	No	online.form
2	Ecosystem Function and Services	What is the effectiveness of different methods for the assessment of ecosystem services?	no	yes	16	student	Female	palaeo	No	online.form
3	Ecosystem Function and Services	How can biodiversity considerations be integrated into economic policies to reflect the monetary and nonmonetary value of biodiversity, ecosystem processes, goods, and services?	no	yes	16	student	Female	palaeo	No	online.form
4	Ecosystem Function and Services	How can ecosystems be managed to increase protection of humans and biodiversity from extreme events?	yes	yes	16	student	Female	palaeo	No	online.form
5	Ecosystem Function and Services	How, where, and when has biodiversity loss affected human welfare?	no	yes	16	student	Female	palaeo	No	online.form
6	Ecosystem Function and Services	What strategies for distributing the material benefits derived from biodiversity most effectively foster environmental stewardship and biodiversity conservation?	no	yes	16	student	Female	palaeo	No	online.form
7	Ecosystem Function and Services	How can protected area networks be designed to increase carbon storage benefits and mitigate climate impacts, with these benefits as incentives to support conservation actions?	yes	yes	16	student	Female	palaeo	No	online.form
8	Ecosystem Function and Services	How does soil biodiversity contribute to the extent and persistence of ecosystem services, including agricultural productivity?	no	yes	16	student	Female	palaeo	No	online.form
9	Climate Change	9. What impact will the melting of polar ice and a reduction in permafrost have on the human use of high-latitude ecosystems, and how will these changes in human use affect biodiversity?	yes	yes	16	student	Female	palaeo	No	online.form
10	Climate Change	10. Which elements of biodiversity in which locations are most vulnerable to climate change, including extreme events?	yes	yes	16	student	Female	palaeo	No	online.form
11	Climate Change	11. How is the resilience of ecosystems to climate change affected by human activities and interventions?	yes	yes	16	student	Female	palaeo	No	online.form
12	Climate Change	12. What factors determine the rates at which coastal ecosystems can respond to sea-level rise, and which of these are amenable to management?	yes	yes	16	student	Female	palaeo	No	online.form
13	Climate Change	13. How will climate change, together with other environmental stressors, alter the distribution and prevalence of diseases of wild species?	no	no	16	student	Female	palaeo	No	online.form
14	Climate Change	14. How will human responses to climate change (e.g., changes in agriculture, resource conflicts, and migration) affect biodiversity?	yes	yes	16	student	Female	palaeo	No	online.form
15	Climate Change	15. How might biodiversity policies and management practices be modified and implemented to accommodate climate change?	yes	yes	16	student	Female	palaeo	No	online.form
16	Climate Change	16. How might emerging carbon markets affect biodiversity through their impacts on the protection, management, and creation of habitats?	yes	yes	16	student	Female	palaeo	No	online.form
17	Climate Change	17. What are the potential effects of feedbacks between climate change and ecosystem dynamics (e.g., drought, forest dieback, and coral bleaching) on the effectiveness of policy measures to sequester carbon and protect biodiversity?	no	no	16	student	Female	palaeo	No	online.form
18	Climate Change	18. How much carbon is sequestered by different ecosystems, including their soils, and how can these ecosystems be managed to contribute most effectively to the mitigation of climate change?	yes	yes	16	student	Female	palaeo	No	online.form
19	Climate Change	19. How, where, and to what extent can natural and seminatural ecosystems contribute to climate change adaptation and mitigation?	no	yes	16	student	Female	palaeo	No	online.form
20	Climate Change	20. How will climate change affect the distribution and impacts of climate-dependent disturbance regimes, such as fire?	yes	yes	16	student	Female	palaeo	No	online.form
21	Climate Change	21. How will climate change affect global food production, and what are the resulting consequences for ecosystems and agrobiodiversity?	yes	yes	16	student	Female	palaeo	No	online.form
22	Climate Change	22. How does biodiversity shape social resilience to the effects of climate change?	no	yes	16	student	Female	palaeo	No	online.form
23	Technological Change	23. How might nanotechnology have positive or negative impacts on biodiversity conservation?	no	no	16	student	Female	palaeo	No	online.form
24	Technological Change	24. How do the type, location, and associated mitigation measures of renewable energy technologies affect biodiversity?	yes	yes	16	student	Female	palaeo	No	online.form
25	Technological Change	25. What are the direct and indirect impacts of genetically modified organisms on biodiversity?	no	no	16	student	Female	palaeo	No	online.form
26	Technological Change	26. What are the implications for land use and biodiversity of the new and emerging “bioeconomy” markets (crops for pharmaceuticals, plastics, adhesives, etc.)?	no	yes	16	student	Female	palaeo	No	online.form
27	Protected Areas	27. How effective are different types of protected areas (e.g., strict nature reserves, hunting reserves, and national parks) at conserving biodiversity and providing ecosystem services?	yes	yes	16	student	Female	palaeo	No	online.form
28	Protected Areas	28. What is the management cost per hectare required to manage protected areas effectively, and how does this vary with management category, geography, and threat?	no	yes	16	student	Female	palaeo	No	online.form
29	Protected Areas	29. What are the human well-being costs and benefits of protected areas, how are these distributed, and how do they vary with governance, resource tenure arrangements, and site characteristics?	no	yes	16	student	Female	palaeo	No	online.form
30	Protected Areas	30. How does the management of protected areas affect conservation beyond the boundaries of the protected area, such as through the displacement of human populations, hunting, or fishing?	yes	yes	16	student	Female	palaeo	No	online.form
31	Ecosystem Management and Restoration	31. What is the trade-off for biodiversity between balancing production of natural resources from intensive management systems, such as plantation forestry and aquaculture, versus harvesting those resources from more natural ecosystems?	yes	yes	16	student	Female	palaeo	No	online.form
32	Ecosystem Management and Restoration	32. What was the condition of ecosystems before significant human disruption, and how can this knowledge be used to improve current and future management?	yes	no	16	student	Female	palaeo	No	online.form
33	Ecosystem Management and Restoration	33. What, and where, are the significant opportunities for large-scale ecosystem restoration that benefits biodiversity and human well-being?	yes	no	16	student	Female	palaeo	No	online.form
34	Ecosystem Management and Restoration	34. How can ecosystem management systems be designed to better emulate natural processes, notably natural disturbance regimes, and to what extent does this improve conservation effectiveness?	no	yes	16	student	Female	palaeo	No	online.form
35	Ecosystem Management and Restoration	35. To what extent, and under what conditions, does the integration of marine, terrestrial, and freshwater ecosystems within conservation plans yield better outcomes than plans based on single realms?	yes	yes	16	student	Female	palaeo	No	online.form
36	Ecosystem Management and Restoration	36. What spatial pattern of human settlement (e.g., clustered vs. dispersed) has the least impact on biodiversity?	yes	yes	16	student	Female	palaeo	No	online.form
37	Ecosystem Management and Restoration	37. What is the contribution of areas that are intensively managed for production of commodities (such as food, timber, or biofuels) to conservation of biodiversity at the landscape scale?	no	yes	16	student	Female	palaeo	No	online.form
38	Ecosystem Management and Restoration	38. How can an understanding of factors affecting household decisions to invest in different naturalresource- based productive activities (e.g., agriculture, fishing, or hunting) be used to predict the biodiversity impacts of household responses to environmental change?	no	yes	16	student	Female	palaeo	No	online.form
39	Terrestrial Ecosystems	39. What are the impacts on biodiversity and ecosystem services of biofuel production and how will these vary by feedstock type, location, objective, and technology applied?	no	yes	16	student	Female	palaeo	No	online.form
40	Terrestrial Ecosystems	40. Under what conditions can agricultural intensification contribute to conserving overall biodiversity by reducing pressure to convert natural ecosystems?	no	yes	16	student	Female	palaeo	No	online.form
41	Terrestrial Ecosystems	41. What are the impacts (on and off site) on agricultural returns and biodiversity of “biodiversity-friendly” agricultural practices, such as organic, minimum tillage, and agroenvironment schemes?	no	yes	16	student	Female	palaeo	No	online.form
42	Terrestrial Ecosystems	42. Under what circumstances can afforestation, reforestation, and reduced emissions from deforestation and degradation (REDD) benefit biodiversity conservation, reduce emissions, and provide sustainable livelihoods?	yes	yes	16	student	Female	palaeo	No	online.form
43	Terrestrial Ecosystems	43. How do different forms of forest governance influence biodiversity conservation outcomes and the implementation of REDD?	no	yes	16	student	Female	palaeo	No	online.form
44	Terrestrial Ecosystems	44. How are arid and semiarid ecosystems affected by the interaction of multiple stressors such as grazing by domestic livestock, soil erosion, and drought?	no	yes	16	student	Female	palaeo	No	online.form
45	Terrestrial Ecosystems	45. What are the contributions of urban nature reserves and other green amenity spaces, such as golf courses, to biodiversity conservation, and how can these be enhanced?	no	yes	16	student	Female	palaeo	No	online.form
46	Marine Ecosystems	46. How will ocean acidification affect marine biodiversity and ecosystem function, and what measures could mitigate these effects?	yes	yes	16	student	Female	palaeo	No	online.form
47	Marine Ecosystems	47. What are the ecological, social, and economic impacts resulting from the expansion of freshwater and marine aquaculture?	yes	yes	16	student	Female	palaeo	No	online.form
48	Marine Ecosystems	48. Which management actions are most effective for ensuring the long-term survival of coral reefs in response to the combined impacts of climate change and other existing stressors?	yes	yes	16	student	Female	palaeo	No	online.form
49	Marine Ecosystems	49. Which management approaches to fisheries are most effective at mitigating the impacts of fish extraction and fishing gear on nontarget species and their habitats?	no	yes	16	student	Female	palaeo	No	online.form
50	Marine Ecosystems	50. How does the effectiveness of marine protected areas vary with biological, physical, and social factors and with connectivity to other protected areas?	no	yes	16	student	Female	palaeo	No	online.form
51	Marine Ecosystems	51. What will be the impacts of climate change on phytoplankton and oceanic productivity, and what will be the feedbacks of these impacts on the climate?	yes	no	16	student	Female	palaeo	No	online.form
52	Marine Ecosystems	52. How will multiple stressors, especially fishing, pollution, sea temperature fluctuations, acidification, and diseases, interact to affect marine ecosystems?	yes	no	16	student	Female	palaeo	No	online.form
53	Marine Ecosystems	53. Which mechanisms are most effective at conserving biodiversity in ocean areas occurring outside the legal jurisdiction of any single country?	no	no	16	student	Female	palaeo	No	online.form
54	Freshwater Ecosystems	54. How can freshwater biodiversity and ecosystem service values best be incorporated in the design of water-provisioning schemes for direct human use and food production?	no	yes	16	student	Female	palaeo	No	online.form
55	Freshwater Ecosystems	55. Which aquatic species and communities are most vulnerable to human impacts, and how would their degradation affect the provision of ecosystem services?	yes	yes	16	student	Female	palaeo	No	online.form
56	Freshwater Ecosystems	56. Where will the impacts of global climate change on hydrology be most extreme, and how might they affect freshwater species and the ability of wetlands and inland waters to deliver ecosystem services?	yes	yes	16	student	Female	palaeo	No	online.form
57	Freshwater Ecosystems	57. Which multinational governance, cross-sector cooperation arrangements, and finance mechanisms will make freshwater ecosystem management more effective and reduce international conflicts over water?	no	yes	16	student	Female	palaeo	No	online.form
58	Freshwater Ecosystems	58. How does investment in restoration of wetlands and riparian areas compare with construction of dams and flood defenses in providing cost-effective improvements in flood management and the storage and retention of water for domestic, industrial, and agricultural use?	no	yes	16	student	Female	palaeo	No	online.form
59	Species Management	59. Under what conditions is trade in captive or wildharvested species beneficial for wild populations of the traded species?	no	yes	16	student	Female	palaeo	No	online.form
60	Species Management	60. What information is required to enable responsible authorities to decide when and how to manage nonnative species?	yes	yes	16	student	Female	palaeo	No	online.form
61	Species Management	61. What is the relative effectiveness of different methods for facilitating movement of a species among disjunct patches of its habitat?	no	yes	16	student	Female	palaeo	No	online.form
62	Species Management	62. What is the cost-effectiveness of different contributions to species conservation programs such as education, captive breeding, and habitat management?	no	yes	16	student	Female	palaeo	No	online.form
63	Species Management	63. What are the ecosystem impacts of efforts to conserve charismatic, flagship, or umbrella species?	yes	yes	16	student	Female	palaeo	No	online.form
64	Species Management	64. What are the likely risks, costs, and benefits of reintroducing and translocating species as a response to climate change?	yes	no	16	student	Female	palaeo	No	online.form
65	Species Management	65. What are the most effective approaches for reversing range and population collapse in top predators, large herbivores, and other species that exert disproportionate effects on ecosystem structure and function?	yes	no	16	student	Female	palaeo	No	online.form
66	Species Management	66. How can we best manage diseases that have the potential to move among wild species, domestic species, and people?	no	yes	16	student	Female	palaeo	No	online.form
67	Organizational Systems and Processes	67. How do the characteristics of the organizations (e.g., government vs. nongovernment) and their funding (e.g., amount and duration of funds) shape the effectiveness of conservation interventions?	no	yes	16	student	Female	palaeo	No	online.form
68	Organizational Systems and Processes	68. What factors affect the extent to which practitioners integrate consideration of human needs and preferences into policy and practice?	no	yes	16	student	Female	palaeo	No	online.form
69	Organizational Systems and Processes	69. What is the cost-effectiveness of different approaches for rapidly expanding professional conservation capacity, and how does this vary with circumstances and among countries?	no	yes	16	student	Female	palaeo	No	online.form
70	Organizational Systems and Processes	70. What is the effectiveness of the different mechanisms used to foster the evaluation and dissemination of conservation interventions?	no	yes	16	student	Female	palaeo	No	online.form
71	Organizational Systems and Processes	71. How effective are the different strategies devised to integrate scientific knowledge into conservation policy and practice?	no	yes	16	student	Female	palaeo	No	online.form
72	Organizational Systems and Processes	72. How effective are the different mechanisms used to promote data sharing and collaboration among individuals, conservationists, and conservation organizations?	no	yes	16	student	Female	palaeo	No	online.form
73	Societal Context and Change	73. What are the impacts on biodiversity of shifting patterns and trends in human demography, economic activity, consumption, and technology?	no	yes	16	student	Female	palaeo	No	online.form
74	Societal Context and Change	74. How does the relationship between economic growth and biodiversity vary across scales, among different types of ecosystems, and with the type of economic activity?	no	yes	16	student	Female	palaeo	No	online.form
75	Societal Context and Change	75. What are the direct and indirect impacts of armed conflict on biodiversity?	no	yes	16	student	Female	palaeo	No	online.form
76	Societal Context and Change	76. What are the biodiversity impacts of changes in energy prices?	no	yes	16	student	Female	palaeo	No	online.form
77	Societal Context and Change	77. How do resource tenure systems shape conservation outcomes in different social and ecological contexts?	no	yes	16	student	Female	palaeo	No	online.form
78	Societal Context and Change	78. What are the impacts of international trade agreements and related policy instruments on biodiversity?	no	yes	16	student	Female	palaeo	No	online.form
79	Societal Context and Change	79. How do economic subsidies affect biodiversity within the recipient country and elsewhere?	no	yes	16	student	Female	palaeo	No	online.form
80	Societal Context and Change	80. How does corruption influence the effectiveness of conservation, and what are the most effective ways of preventing negative consequences?	no	yes	16	student	Female	palaeo	No	online.form
81	Societal Context and Change	81. What are the conservation impacts of improved access to education, employment, and reproductive choice?	no	yes	16	student	Female	palaeo	No	online.form
82	Societal Context and Change	82. What is the relationship between individuals learning about environmental problems and their conservation attitudes, knowledge, beliefs, and behaviors?	no	yes	16	student	Female	palaeo	No	online.form
83	Societal Context and Change	83. What are the impacts of increasing human dissociation from nature on the conservation of biodiversity?	no	yes	16	student	Female	palaeo	No	online.form
84	Societal Context and Change	84. What are the effects of changes in human patterns of food consumption on biodiversity (e.g., shift from bushmeat to domestic meat and from fish to plantbased protein), and how are such human patterns of food consumption shaped by education programs, financial incentives, and other policy instruments?	no	yes	16	student	Female	palaeo	No	online.form
85	Societal Context and Change	85. What factors shape human (in)tolerance of the presence and activities ofwild animals, especially where those animals induce human–wildlife conflict?	no	yes	16	student	Female	palaeo	No	online.form
86	Impacts of Conservation Interventions	86. What have been the impacts on biodiversity of the Convention on Biological Diversity 2010 targets, and what objectives, mechanism, time frame, and means of measurement would be most effective for future targets?	no	yes	16	student	Female	palaeo	No	online.form
87	Impacts of Conservation Interventions	87. How do different values (e.g., use vs. preservation) and the framing of these values (e.g., ecosystem services vs. species) motivate policy makers to assign public resources to conservation programs and policies?	no	yes	16	student	Female	palaeo	No	online.form
88	Impacts of Conservation Interventions	88. What factors shape individual and state compliance with local, national, and international conservation regimes?	no	yes	16	student	Female	palaeo	No	online.form
89	Impacts of Conservation Interventions	89. What are the consequences of investment in improving knowledge (e.g., status, nature of threat, and effectiveness of interventions) versus expenditure on conservation action, and how does this differ among conservation issues?	no	yes	16	student	Female	palaeo	No	online.form
90	Impacts of Conservation Interventions	90. What are the impacts on biodiversity and human well-being of differing approaches to devolving the responsibility for natural resource management?	no	yes	16	student	Female	palaeo	No	online.form
91	Impacts of Conservation Interventions	91. What are the impacts of different conservation incentive programs on biodiversity and human wellbeing?	no	yes	16	student	Female	palaeo	No	online.form
92	Impacts of Conservation Interventions	92. How does public involvement, especially of marginalized groups, in conservation decision making shape the effectiveness of conservation interventions?	no	yes	16	student	Female	palaeo	No	online.form
93	Impacts of Conservation Interventions	93. What are the impacts of free, prior, and informed consent policies on the emergence, evolution, and performance of conservation interventions?	no	yes	16	student	Female	palaeo	No	online.form
94	Impacts of Conservation Interventions	94. How does providing information to resource users affect individual behavior and support for collective restrictions, and how does the effect vary with different means of providing the information?	no	yes	16	student	Female	palaeo	No	online.form
95	Impacts of Conservation Interventions	95. What are the conservation impacts of corporate social responsibility regimes that are biodiversityoriented?	no	yes	16	student	Female	palaeo	No	online.form
96	Impacts of Conservation Interventions	96. What are the social impacts of conservation interventions, and how and why do these impacts vary among social groups (e.g., elites, poor, women, and indigenous)?	no	yes	16	student	Female	palaeo	No	online.form
97	Impacts of Conservation Interventions	97. What factors shape the likelihood and extent of formal recognition of customary rights and traditional institutions as the basis for conservation policy and practices, and what are the impacts of this formal recognition on conservation outcomes?	no	yes	16	student	Female	palaeo	No	online.form
98	Impacts of Conservation Interventions	98. What are the most cost-effectivemeans of encouraging broad, long-lasting, and active societal support and action for conservation in different contexts and among different actors?	no	yes	16	student	Female	palaeo	No	online.form
99	Impacts of Conservation Interventions	99. What has been the effect of environmental impact assessments on biodiversity conservation?	no	yes	16	student	Female	palaeo	No	online.form
100	Impacts of Conservation Interventions	100. What mechanisms best promote the use of local ideas and knowledge in conservation programs in ways that enhance biodiversity outcomes?	no	yes	16	student	Female	palaeo	No	online.form
1	Ecosystem Function and Services	Do critical thresholds exist at which the loss of species diversity, or the loss of particular species, disrupts ecosystem functions and services, and how can these thresholds be predicted?	yes	yes	17	postdoc	Female	palaeo	No	online.form
2	Ecosystem Function and Services	What is the effectiveness of different methods for the assessment of ecosystem services?	yes	yes	17	postdoc	Female	palaeo	No	online.form
3	Ecosystem Function and Services	How can biodiversity considerations be integrated into economic policies to reflect the monetary and nonmonetary value of biodiversity, ecosystem processes, goods, and services?	yes	yes	17	postdoc	Female	palaeo	No	online.form
4	Ecosystem Function and Services	How can ecosystems be managed to increase protection of humans and biodiversity from extreme events?	no	yes	17	postdoc	Female	palaeo	No	online.form
5	Ecosystem Function and Services	How, where, and when has biodiversity loss affected human welfare?	no	yes	17	postdoc	Female	palaeo	No	online.form
6	Ecosystem Function and Services	What strategies for distributing the material benefits derived from biodiversity most effectively foster environmental stewardship and biodiversity conservation?	yes	yes	17	postdoc	Female	palaeo	No	online.form
7	Ecosystem Function and Services	How can protected area networks be designed to increase carbon storage benefits and mitigate climate impacts, with these benefits as incentives to support conservation actions?	no	yes	17	postdoc	Female	palaeo	No	online.form
8	Ecosystem Function and Services	How does soil biodiversity contribute to the extent and persistence of ecosystem services, including agricultural productivity?	yes	yes	17	postdoc	Female	palaeo	No	online.form
9	Climate Change	9. What impact will the melting of polar ice and a reduction in permafrost have on the human use of high-latitude ecosystems, and how will these changes in human use affect biodiversity?	yes	yes	17	postdoc	Female	palaeo	No	online.form
10	Climate Change	10. Which elements of biodiversity in which locations are most vulnerable to climate change, including extreme events?	yes	yes	17	postdoc	Female	palaeo	No	online.form
11	Climate Change	11. How is the resilience of ecosystems to climate change affected by human activities and interventions?	yes	yes	17	postdoc	Female	palaeo	No	online.form
12	Climate Change	12. What factors determine the rates at which coastal ecosystems can respond to sea-level rise, and which of these are amenable to management?	yes	yes	17	postdoc	Female	palaeo	No	online.form
13	Climate Change	13. How will climate change, together with other environmental stressors, alter the distribution and prevalence of diseases of wild species?	yes	yes	17	postdoc	Female	palaeo	No	online.form
14	Climate Change	14. How will human responses to climate change (e.g., changes in agriculture, resource conflicts, and migration) affect biodiversity?	no	yes	17	postdoc	Female	palaeo	No	online.form
15	Climate Change	15. How might biodiversity policies and management practices be modified and implemented to accommodate climate change?	yes	yes	17	postdoc	Female	palaeo	No	online.form
16	Climate Change	16. How might emerging carbon markets affect biodiversity through their impacts on the protection, management, and creation of habitats?	no	yes	17	postdoc	Female	palaeo	No	online.form
17	Climate Change	17. What are the potential effects of feedbacks between climate change and ecosystem dynamics (e.g., drought, forest dieback, and coral bleaching) on the effectiveness of policy measures to sequester carbon and protect biodiversity?	yes	yes	17	postdoc	Female	palaeo	No	online.form
18	Climate Change	18. How much carbon is sequestered by different ecosystems, including their soils, and how can these ecosystems be managed to contribute most effectively to the mitigation of climate change?	yes	yes	17	postdoc	Female	palaeo	No	online.form
19	Climate Change	19. How, where, and to what extent can natural and seminatural ecosystems contribute to climate change adaptation and mitigation?	yes	yes	17	postdoc	Female	palaeo	No	online.form
20	Climate Change	20. How will climate change affect the distribution and impacts of climate-dependent disturbance regimes, such as fire?	yes	yes	17	postdoc	Female	palaeo	No	online.form
21	Climate Change	21. How will climate change affect global food production, and what are the resulting consequences for ecosystems and agrobiodiversity?	no	yes	17	postdoc	Female	palaeo	No	online.form
22	Climate Change	22. How does biodiversity shape social resilience to the effects of climate change?	yes	yes	17	postdoc	Female	palaeo	No	online.form
23	Technological Change	23. How might nanotechnology have positive or negative impacts on biodiversity conservation?	yes	yes	17	postdoc	Female	palaeo	No	online.form
24	Technological Change	24. How do the type, location, and associated mitigation measures of renewable energy technologies affect biodiversity?	no	yes	17	postdoc	Female	palaeo	No	online.form
25	Technological Change	25. What are the direct and indirect impacts of genetically modified organisms on biodiversity?	yes	yes	17	postdoc	Female	palaeo	No	online.form
26	Technological Change	26. What are the implications for land use and biodiversity of the new and emerging “bioeconomy” markets (crops for pharmaceuticals, plastics, adhesives, etc.)?	no	yes	17	postdoc	Female	palaeo	No	online.form
27	Protected Areas	27. How effective are different types of protected areas (e.g., strict nature reserves, hunting reserves, and national parks) at conserving biodiversity and providing ecosystem services?	yes	yes	17	postdoc	Female	palaeo	No	online.form
28	Protected Areas	28. What is the management cost per hectare required to manage protected areas effectively, and how does this vary with management category, geography, and threat?	no	yes	17	postdoc	Female	palaeo	No	online.form
29	Protected Areas	29. What are the human well-being costs and benefits of protected areas, how are these distributed, and how do they vary with governance, resource tenure arrangements, and site characteristics?	no	yes	17	postdoc	Female	palaeo	No	online.form
30	Protected Areas	30. How does the management of protected areas affect conservation beyond the boundaries of the protected area, such as through the displacement of human populations, hunting, or fishing?	no	yes	17	postdoc	Female	palaeo	No	online.form
31	Ecosystem Management and Restoration	31. What is the trade-off for biodiversity between balancing production of natural resources from intensive management systems, such as plantation forestry and aquaculture, versus harvesting those resources from more natural ecosystems?	no	yes	17	postdoc	Female	palaeo	No	online.form
32	Ecosystem Management and Restoration	32. What was the condition of ecosystems before significant human disruption, and how can this knowledge be used to improve current and future management?	yes	yes	17	postdoc	Female	palaeo	No	online.form
33	Ecosystem Management and Restoration	33. What, and where, are the significant opportunities for large-scale ecosystem restoration that benefits biodiversity and human well-being?	yes	yes	17	postdoc	Female	palaeo	No	online.form
34	Ecosystem Management and Restoration	34. How can ecosystem management systems be designed to better emulate natural processes, notably natural disturbance regimes, and to what extent does this improve conservation effectiveness?	yes	yes	17	postdoc	Female	palaeo	No	online.form
35	Ecosystem Management and Restoration	35. To what extent, and under what conditions, does the integration of marine, terrestrial, and freshwater ecosystems within conservation plans yield better outcomes than plans based on single realms?	yes	yes	17	postdoc	Female	palaeo	No	online.form
36	Ecosystem Management and Restoration	36. What spatial pattern of human settlement (e.g., clustered vs. dispersed) has the least impact on biodiversity?	no	yes	17	postdoc	Female	palaeo	No	online.form
37	Ecosystem Management and Restoration	37. What is the contribution of areas that are intensively managed for production of commodities (such as food, timber, or biofuels) to conservation of biodiversity at the landscape scale?	no	yes	17	postdoc	Female	palaeo	No	online.form
38	Ecosystem Management and Restoration	38. How can an understanding of factors affecting household decisions to invest in different naturalresource- based productive activities (e.g., agriculture, fishing, or hunting) be used to predict the biodiversity impacts of household responses to environmental change?	no	yes	17	postdoc	Female	palaeo	No	online.form
39	Terrestrial Ecosystems	39. What are the impacts on biodiversity and ecosystem services of biofuel production and how will these vary by feedstock type, location, objective, and technology applied?	no	yes	17	postdoc	Female	palaeo	No	online.form
40	Terrestrial Ecosystems	40. Under what conditions can agricultural intensification contribute to conserving overall biodiversity by reducing pressure to convert natural ecosystems?	no	yes	17	postdoc	Female	palaeo	No	online.form
41	Terrestrial Ecosystems	41. What are the impacts (on and off site) on agricultural returns and biodiversity of “biodiversity-friendly” agricultural practices, such as organic, minimum tillage, and agroenvironment schemes?	no	yes	17	postdoc	Female	palaeo	No	online.form
42	Terrestrial Ecosystems	42. Under what circumstances can afforestation, reforestation, and reduced emissions from deforestation and degradation (REDD) benefit biodiversity conservation, reduce emissions, and provide sustainable livelihoods?	yes	yes	17	postdoc	Female	palaeo	No	online.form
43	Terrestrial Ecosystems	43. How do different forms of forest governance influence biodiversity conservation outcomes and the implementation of REDD?	no	yes	17	postdoc	Female	palaeo	No	online.form
44	Terrestrial Ecosystems	44. How are arid and semiarid ecosystems affected by the interaction of multiple stressors such as grazing by domestic livestock, soil erosion, and drought?	yes	yes	17	postdoc	Female	palaeo	No	online.form
45	Terrestrial Ecosystems	45. What are the contributions of urban nature reserves and other green amenity spaces, such as golf courses, to biodiversity conservation, and how can these be enhanced?	no	yes	17	postdoc	Female	palaeo	No	online.form
46	Marine Ecosystems	46. How will ocean acidification affect marine biodiversity and ecosystem function, and what measures could mitigate these effects?	yes	yes	17	postdoc	Female	palaeo	No	online.form
47	Marine Ecosystems	47. What are the ecological, social, and economic impacts resulting from the expansion of freshwater and marine aquaculture?	no	yes	17	postdoc	Female	palaeo	No	online.form
48	Marine Ecosystems	48. Which management actions are most effective for ensuring the long-term survival of coral reefs in response to the combined impacts of climate change and other existing stressors?	yes	yes	17	postdoc	Female	palaeo	No	online.form
49	Marine Ecosystems	49. Which management approaches to fisheries are most effective at mitigating the impacts of fish extraction and fishing gear on nontarget species and their habitats?	no	yes	17	postdoc	Female	palaeo	No	online.form
50	Marine Ecosystems	50. How does the effectiveness of marine protected areas vary with biological, physical, and social factors and with connectivity to other protected areas?	no	yes	17	postdoc	Female	palaeo	No	online.form
51	Marine Ecosystems	51. What will be the impacts of climate change on phytoplankton and oceanic productivity, and what will be the feedbacks of these impacts on the climate?	yes	yes	17	postdoc	Female	palaeo	No	online.form
52	Marine Ecosystems	52. How will multiple stressors, especially fishing, pollution, sea temperature fluctuations, acidification, and diseases, interact to affect marine ecosystems?	yes	yes	17	postdoc	Female	palaeo	No	online.form
53	Marine Ecosystems	53. Which mechanisms are most effective at conserving biodiversity in ocean areas occurring outside the legal jurisdiction of any single country?	no	yes	17	postdoc	Female	palaeo	No	online.form
54	Freshwater Ecosystems	54. How can freshwater biodiversity and ecosystem service values best be incorporated in the design of water-provisioning schemes for direct human use and food production?	no	yes	17	postdoc	Female	palaeo	No	online.form
55	Freshwater Ecosystems	55. Which aquatic species and communities are most vulnerable to human impacts, and how would their degradation affect the provision of ecosystem services?	no	yes	17	postdoc	Female	palaeo	No	online.form
56	Freshwater Ecosystems	56. Where will the impacts of global climate change on hydrology be most extreme, and how might they affect freshwater species and the ability of wetlands and inland waters to deliver ecosystem services?	yes	yes	17	postdoc	Female	palaeo	No	online.form
57	Freshwater Ecosystems	57. Which multinational governance, cross-sector cooperation arrangements, and finance mechanisms will make freshwater ecosystem management more effective and reduce international conflicts over water?	no	yes	17	postdoc	Female	palaeo	No	online.form
58	Freshwater Ecosystems	58. How does investment in restoration of wetlands and riparian areas compare with construction of dams and flood defenses in providing cost-effective improvements in flood management and the storage and retention of water for domestic, industrial, and agricultural use?	no	yes	17	postdoc	Female	palaeo	No	online.form
59	Species Management	59. Under what conditions is trade in captive or wildharvested species beneficial for wild populations of the traded species?	no	yes	17	postdoc	Female	palaeo	No	online.form
60	Species Management	60. What information is required to enable responsible authorities to decide when and how to manage nonnative species?	yes	yes	17	postdoc	Female	palaeo	No	online.form
61	Species Management	61. What is the relative effectiveness of different methods for facilitating movement of a species among disjunct patches of its habitat?	yes	yes	17	postdoc	Female	palaeo	No	online.form
62	Species Management	62. What is the cost-effectiveness of different contributions to species conservation programs such as education, captive breeding, and habitat management?	no	yes	17	postdoc	Female	palaeo	No	online.form
63	Species Management	63. What are the ecosystem impacts of efforts to conserve charismatic, flagship, or umbrella species?	yes	yes	17	postdoc	Female	palaeo	No	online.form
64	Species Management	64. What are the likely risks, costs, and benefits of reintroducing and translocating species as a response to climate change?	yes	yes	17	postdoc	Female	palaeo	No	online.form
65	Species Management	65. What are the most effective approaches for reversing range and population collapse in top predators, large herbivores, and other species that exert disproportionate effects on ecosystem structure and function?	yes	yes	17	postdoc	Female	palaeo	No	online.form
66	Species Management	66. How can we best manage diseases that have the potential to move among wild species, domestic species, and people?	no	yes	17	postdoc	Female	palaeo	No	online.form
67	Organizational Systems and Processes	67. How do the characteristics of the organizations (e.g., government vs. nongovernment) and their funding (e.g., amount and duration of funds) shape the effectiveness of conservation interventions?	no	no	17	postdoc	Female	palaeo	No	online.form
68	Organizational Systems and Processes	68. What factors affect the extent to which practitioners integrate consideration of human needs and preferences into policy and practice?	no	no	17	postdoc	Female	palaeo	No	online.form
69	Organizational Systems and Processes	69. What is the cost-effectiveness of different approaches for rapidly expanding professional conservation capacity, and how does this vary with circumstances and among countries?	no	yes	17	postdoc	Female	palaeo	No	online.form
70	Organizational Systems and Processes	70. What is the effectiveness of the different mechanisms used to foster the evaluation and dissemination of conservation interventions?	no	yes	17	postdoc	Female	palaeo	No	online.form
71	Organizational Systems and Processes	71. How effective are the different strategies devised to integrate scientific knowledge into conservation policy and practice?	no	yes	17	postdoc	Female	palaeo	No	online.form
72	Organizational Systems and Processes	72. How effective are the different mechanisms used to promote data sharing and collaboration among individuals, conservationists, and conservation organizations?	no	no	17	postdoc	Female	palaeo	No	online.form
73	Societal Context and Change	73. What are the impacts on biodiversity of shifting patterns and trends in human demography, economic activity, consumption, and technology?	no	yes	17	postdoc	Female	palaeo	No	online.form
74	Societal Context and Change	74. How does the relationship between economic growth and biodiversity vary across scales, among different types of ecosystems, and with the type of economic activity?	no	yes	17	postdoc	Female	palaeo	No	online.form
75	Societal Context and Change	75. What are the direct and indirect impacts of armed conflict on biodiversity?	yes	yes	17	postdoc	Female	palaeo	No	online.form
76	Societal Context and Change	76. What are the biodiversity impacts of changes in energy prices?	no	yes	17	postdoc	Female	palaeo	No	online.form
77	Societal Context and Change	77. How do resource tenure systems shape conservation outcomes in different social and ecological contexts?	no	yes	17	postdoc	Female	palaeo	No	online.form
78	Societal Context and Change	78. What are the impacts of international trade agreements and related policy instruments on biodiversity?	no	yes	17	postdoc	Female	palaeo	No	online.form
79	Societal Context and Change	79. How do economic subsidies affect biodiversity within the recipient country and elsewhere?	no	yes	17	postdoc	Female	palaeo	No	online.form
80	Societal Context and Change	80. How does corruption influence the effectiveness of conservation, and what are the most effective ways of preventing negative consequences?	no	yes	17	postdoc	Female	palaeo	No	online.form
81	Societal Context and Change	81. What are the conservation impacts of improved access to education, employment, and reproductive choice?	no	no	17	postdoc	Female	palaeo	No	online.form
82	Societal Context and Change	82. What is the relationship between individuals learning about environmental problems and their conservation attitudes, knowledge, beliefs, and behaviors?	no	no	17	postdoc	Female	palaeo	No	online.form
83	Societal Context and Change	83. What are the impacts of increasing human dissociation from nature on the conservation of biodiversity?	no	no	17	postdoc	Female	palaeo	No	online.form
84	Societal Context and Change	84. What are the effects of changes in human patterns of food consumption on biodiversity (e.g., shift from bushmeat to domestic meat and from fish to plantbased protein), and how are such human patterns of food consumption shaped by education programs, financial incentives, and other policy instruments?	no	yes	17	postdoc	Female	palaeo	No	online.form
85	Societal Context and Change	85. What factors shape human (in)tolerance of the presence and activities ofwild animals, especially where those animals induce human–wildlife conflict?	no	yes	17	postdoc	Female	palaeo	No	online.form
86	Impacts of Conservation Interventions	86. What have been the impacts on biodiversity of the Convention on Biological Diversity 2010 targets, and what objectives, mechanism, time frame, and means of measurement would be most effective for future targets?	no	yes	17	postdoc	Female	palaeo	No	online.form
87	Impacts of Conservation Interventions	87. How do different values (e.g., use vs. preservation) and the framing of these values (e.g., ecosystem services vs. species) motivate policy makers to assign public resources to conservation programs and policies?	no	yes	17	postdoc	Female	palaeo	No	online.form
88	Impacts of Conservation Interventions	88. What factors shape individual and state compliance with local, national, and international conservation regimes?	no	yes	17	postdoc	Female	palaeo	No	online.form
89	Impacts of Conservation Interventions	89. What are the consequences of investment in improving knowledge (e.g., status, nature of threat, and effectiveness of interventions) versus expenditure on conservation action, and how does this differ among conservation issues?	no	yes	17	postdoc	Female	palaeo	No	online.form
90	Impacts of Conservation Interventions	90. What are the impacts on biodiversity and human well-being of differing approaches to devolving the responsibility for natural resource management?	no	yes	17	postdoc	Female	palaeo	No	online.form
91	Impacts of Conservation Interventions	91. What are the impacts of different conservation incentive programs on biodiversity and human wellbeing?	no	yes	17	postdoc	Female	palaeo	No	online.form
92	Impacts of Conservation Interventions	92. How does public involvement, especially of marginalized groups, in conservation decision making shape the effectiveness of conservation interventions?	no	yes	17	postdoc	Female	palaeo	No	online.form
93	Impacts of Conservation Interventions	93. What are the impacts of free, prior, and informed consent policies on the emergence, evolution, and performance of conservation interventions?	no	yes	17	postdoc	Female	palaeo	No	online.form
94	Impacts of Conservation Interventions	94. How does providing information to resource users affect individual behavior and support for collective restrictions, and how does the effect vary with different means of providing the information?	no	yes	17	postdoc	Female	palaeo	No	online.form
95	Impacts of Conservation Interventions	95. What are the conservation impacts of corporate social responsibility regimes that are biodiversityoriented?	no	yes	17	postdoc	Female	palaeo	No	online.form
96	Impacts of Conservation Interventions	96. What are the social impacts of conservation interventions, and how and why do these impacts vary among social groups (e.g., elites, poor, women, and indigenous)?	no	yes	17	postdoc	Female	palaeo	No	online.form
97	Impacts of Conservation Interventions	97. What factors shape the likelihood and extent of formal recognition of customary rights and traditional institutions as the basis for conservation policy and practices, and what are the impacts of this formal recognition on conservation outcomes?	no	yes	17	postdoc	Female	palaeo	No	online.form
98	Impacts of Conservation Interventions	98. What are the most cost-effectivemeans of encouraging broad, long-lasting, and active societal support and action for conservation in different contexts and among different actors?	no	yes	17	postdoc	Female	palaeo	No	online.form
99	Impacts of Conservation Interventions	99. What has been the effect of environmental impact assessments on biodiversity conservation?	no	yes	17	postdoc	Female	palaeo	No	online.form
100	Impacts of Conservation Interventions	100. What mechanisms best promote the use of local ideas and knowledge in conservation programs in ways that enhance biodiversity outcomes?	no	yes	17	postdoc	Female	palaeo	No	online.form
1	Ecosystem Function and Services	Do critical thresholds exist at which the loss of species diversity, or the loss of particular species, disrupts ecosystem functions and services, and how can these thresholds be predicted?	yes	yes	18	student	Male	conservation	Yes	online.form
2	Ecosystem Function and Services	What is the effectiveness of different methods for the assessment of ecosystem services?	no	yes	18	student	Male	conservation	Yes	online.form
3	Ecosystem Function and Services	How can biodiversity considerations be integrated into economic policies to reflect the monetary and nonmonetary value of biodiversity, ecosystem processes, goods, and services?	yes	yes	18	student	Male	conservation	Yes	online.form
4	Ecosystem Function and Services	How can ecosystems be managed to increase protection of humans and biodiversity from extreme events?	yes	yes	18	student	Male	conservation	Yes	online.form
5	Ecosystem Function and Services	How, where, and when has biodiversity loss affected human welfare?	yes	yes	18	student	Male	conservation	Yes	online.form
6	Ecosystem Function and Services	What strategies for distributing the material benefits derived from biodiversity most effectively foster environmental stewardship and biodiversity conservation?	yes	yes	18	student	Male	conservation	Yes	online.form
7	Ecosystem Function and Services	How can protected area networks be designed to increase carbon storage benefits and mitigate climate impacts, with these benefits as incentives to support conservation actions?	yes	yes	18	student	Male	conservation	Yes	online.form
8	Ecosystem Function and Services	How does soil biodiversity contribute to the extent and persistence of ecosystem services, including agricultural productivity?	yes	yes	18	student	Male	conservation	Yes	online.form
9	Climate Change	9. What impact will the melting of polar ice and a reduction in permafrost have on the human use of high-latitude ecosystems, and how will these changes in human use affect biodiversity?	yes	yes	18	student	Male	conservation	Yes	online.form
10	Climate Change	10. Which elements of biodiversity in which locations are most vulnerable to climate change, including extreme events?	yes	yes	18	student	Male	conservation	Yes	online.form
[truncated: 5,390 more rows]
